# Supplementary material for: Spatially resolved multiomics on the neuronal effects induced by spaceflight
Source: Research Square preprint supplement (doi:10.21203/rs.3.rs-2865086/v1), 2023-05-31
Supplement: Supplementary file 1 [file 4a73adf9e74e4667c56a7244.xlsx]

## Sheet: Sheet1
Supplementary Table 2: Multiomics clusters annotations. Functional annotations of the 18 (0-17) multiomics clusters identified in the multiomics brain dataset according to functions. Cluster Annotation column denotes the shorter names for these cluster annotations.
Cluster ID	Cluster Annotation	Cluster Functions
0	Neurogenesis I	Neuronal activity and synaptic transmission in immature neural cells and telencephalon projecting neurons
1	Synaptic Transmission I	Synaptic transmission in di- and mesencephalon neurons
2	Neuronal activity, Synaptic Transmission I	Neuronal activity and synaptic transmission in cholinergic, monoaminergic and peptidergic neurons
3	Myelination	Myelination in oligodendrocytes
4	Astrocytes	Astrocyte functions: regulation of neurotransmission and neurovasculature
5	Glutamatergic Synaptic Transmission I	(Glutamatergic) synaptic transmission in telencephalon interneurons
6	Glutamatergic Synaptic Transmission II	(Glutamatergic) synaptic transmission in cholinergic, monoaminergic and peptidergic neurons
7	Glial development	Glial development
8	Glutamatergic Synaptic Transmission III	(Glutamatergic) synaptic transmission in di- and mesencephalon neurons
9	Neurogenesis II	Development of neuronal projections in neural crest-like glia
10	Microglia	Immune functions in Microglia
11	GABAergic Synaptic Transmission	Neuronal activity and (GABAergic) synaptic transmission in telencephalon interneurons
12	Neurovasculature	Vasculature (mostly brain vascular endothelial cells)
13	Neuronal activity, synaptic transmission II	Neuronal activity and synaptic transmission in di- and mesencephalon neurons
14	Neuroendocrine activity	Synaptic transmission in cholinergic, monoaminergic and peptidergic neurons of hypothalamus and the neuroendocrine system
15	Neuronal activity, synaptic transmission III	Neuronal activity and synaptic transmission in di- and mesencephalon neurons
16	Glutamatergic synaptic transmission IV	(Glutamatergic) synaptic transmission in di- and mesencephalon neurons
17	Synaptic transmission II	Synaptic transmission in cholinergic, monoaminergic and peptidergic neurons
