# Supplementary material for: Spatially resolved multiomics on the neuronal effects induced by spaceflight
Source: Research Square preprint supplement (doi:10.21203/rs.3.rs-2865086/v1), 2023-05-31
Supplement: Supplementary file 1 [file f23c0d3310a8207aa663c981.pdf]

## Supplementary Information

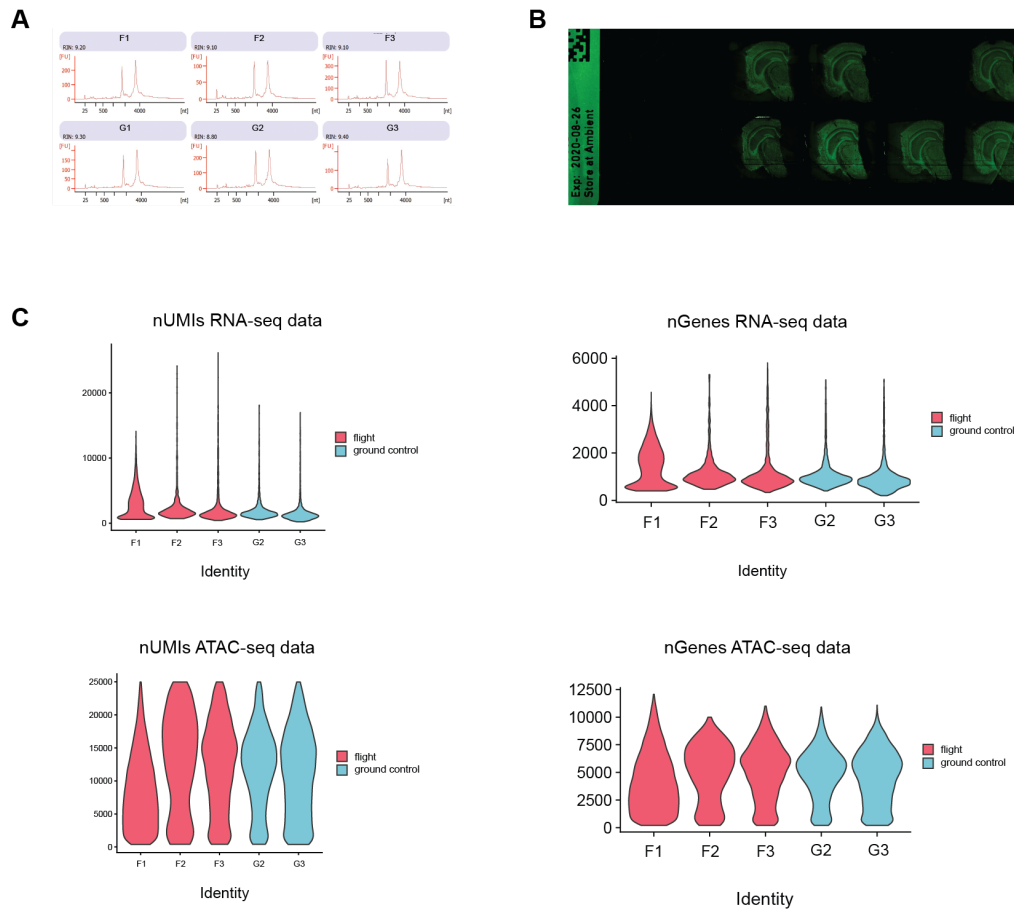

**Supplementary Figure 1: A**, Bioanalyzer traces showing RIN values for all brain samples. **B**, Fluorescent footprints of brain tissue section obtained from Visium Tissue Optimization protocol by 10x Genomics (for detailed protocol see: UserGuide\_RevB, CG000238), each section footprint represents different times tested during permeabilization step, empty position represents negative control, section untreated with permeabilization mix. **C**, Distributions of unique molecules/genes per nucleus per sample in single nuclei multiomics dataset (RNA-seq, ATAC-seq) visualized as violin plots colored by sample condition.

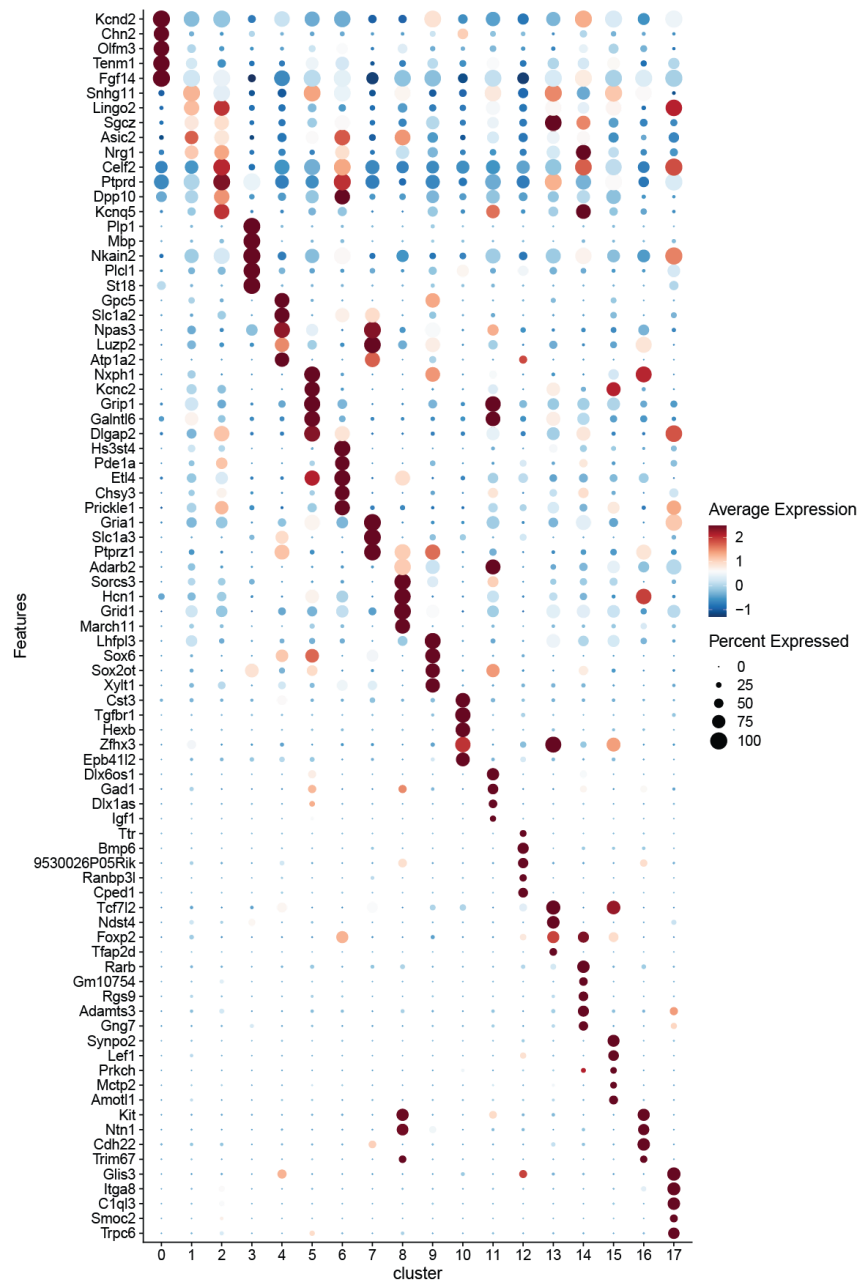

**Supplementary Figure 2:** Marker genes for each multiomics cluster visualized as Dot Plot.



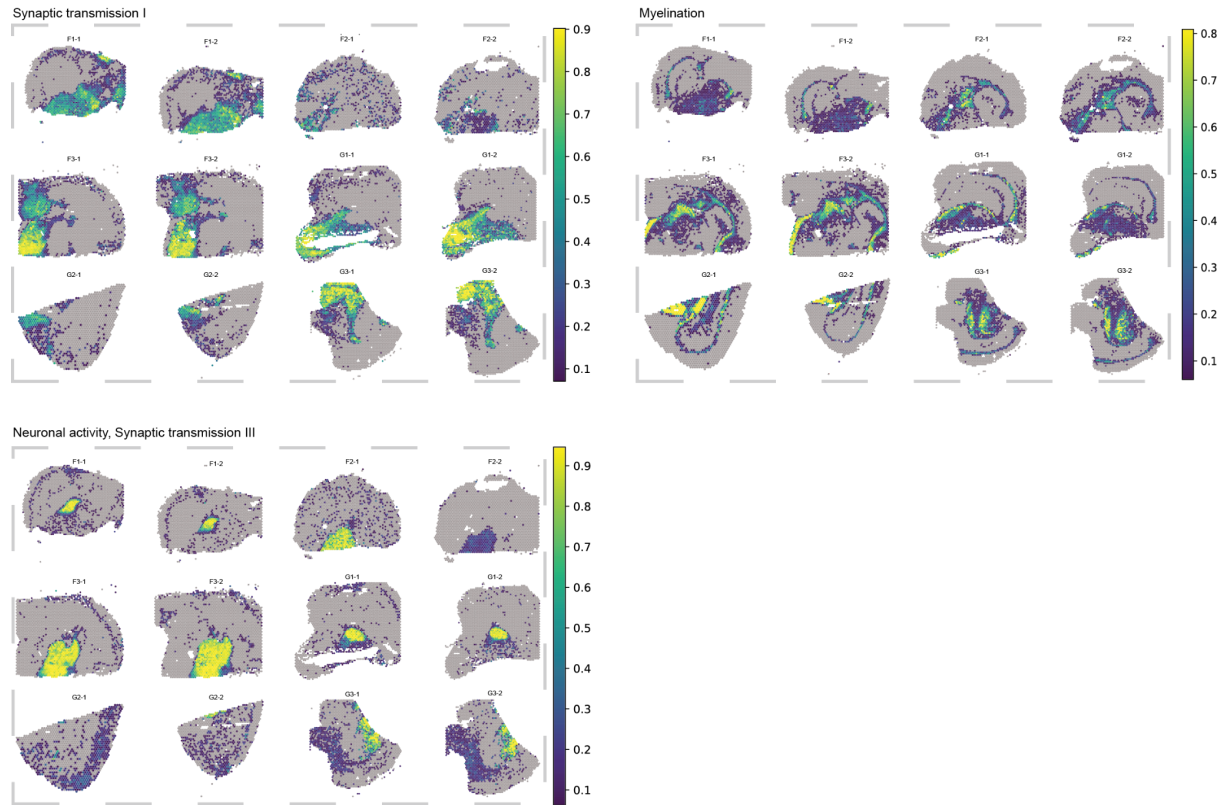

**Supplementary Figure 5:** Spatial localization of multiomics clusters 1, 3 and 15 (Synaptic Transmission I, Myelination and Neuronal activity, Synaptic Transmission III) visualized on all brain sections.

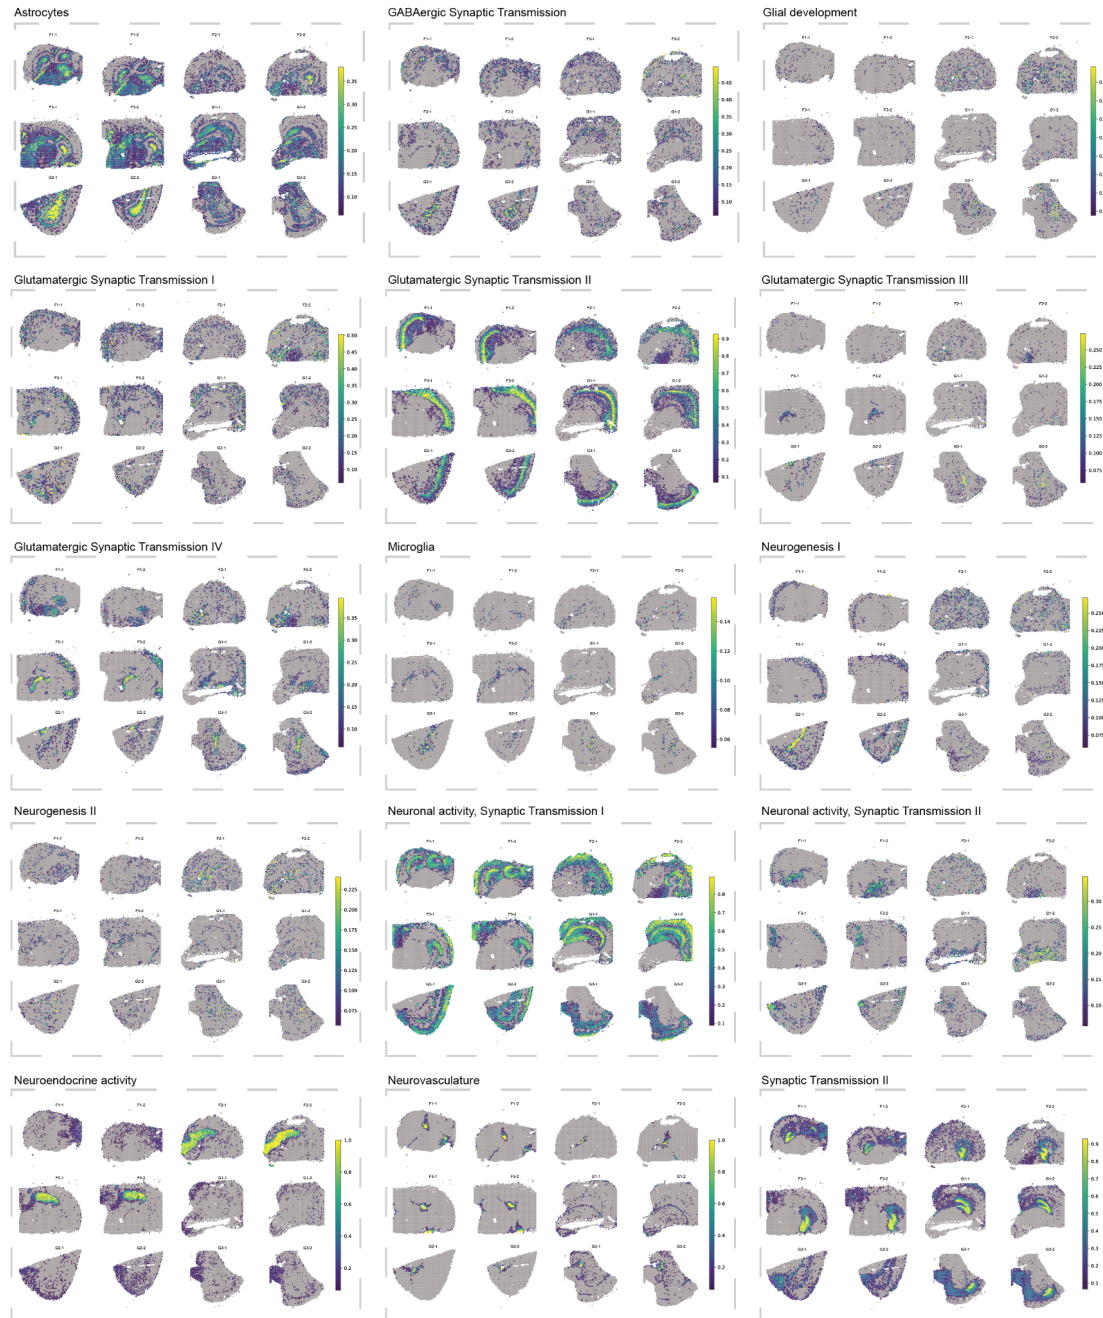

**Supplementary Figure 6:** Spatial localization of the other multiomics clusters visualized on all brain sections.

# Glycolysis\_gluconeogenesis - ST

Heatmap of log2 FC flight vs ground

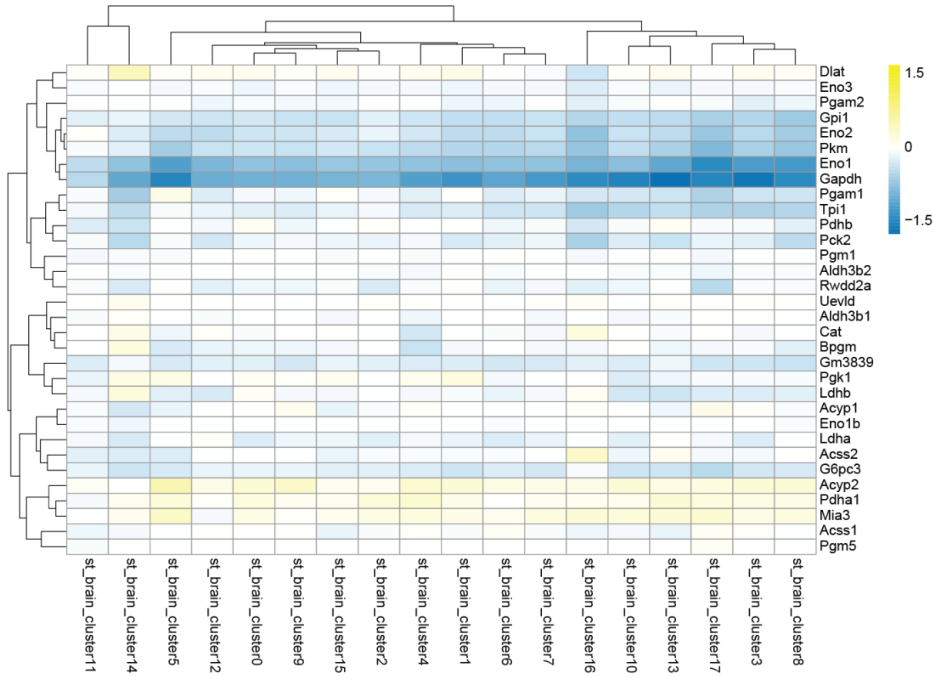

# Glycolysis\_gluconeogenesis - multiomics

Heatmap of log2 FC flight vs ground

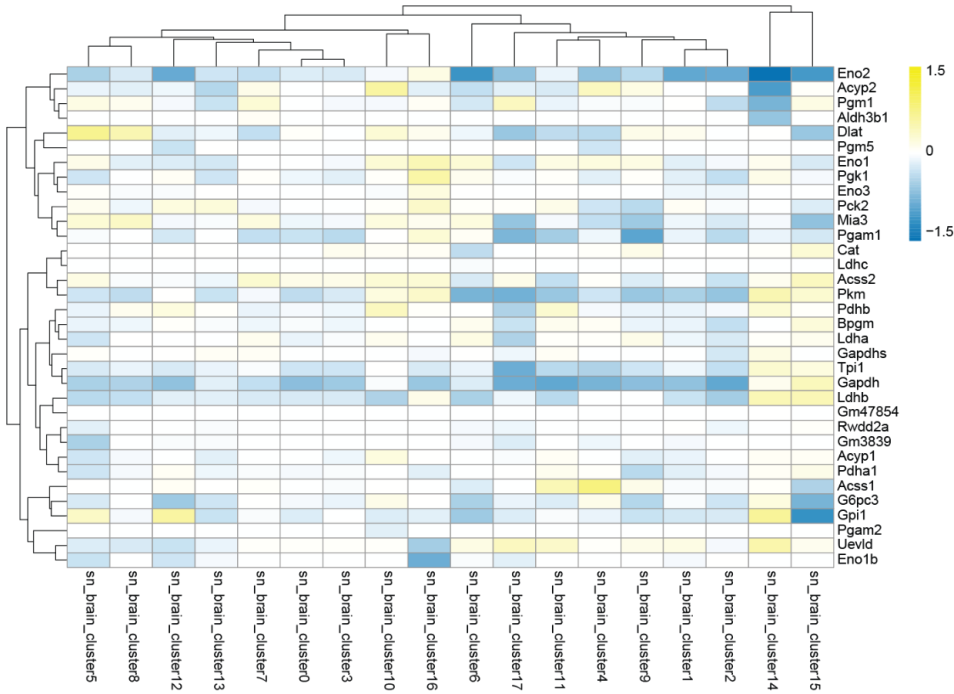

**Supplementary Figure 7:** Heatmap showing log<sub>2</sub> FC between flight and ground control samples in glycolysis and gluconeogenesis pathways in both ST and multiomics datasets.

## Fructose and mannose metabolism - ST

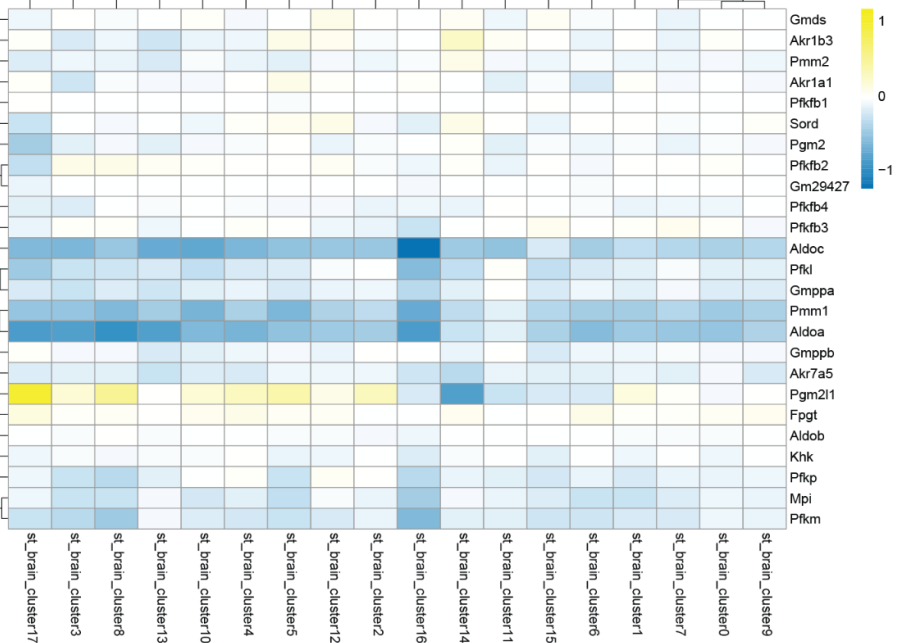

Fructose and mannose metabolism - multiomics

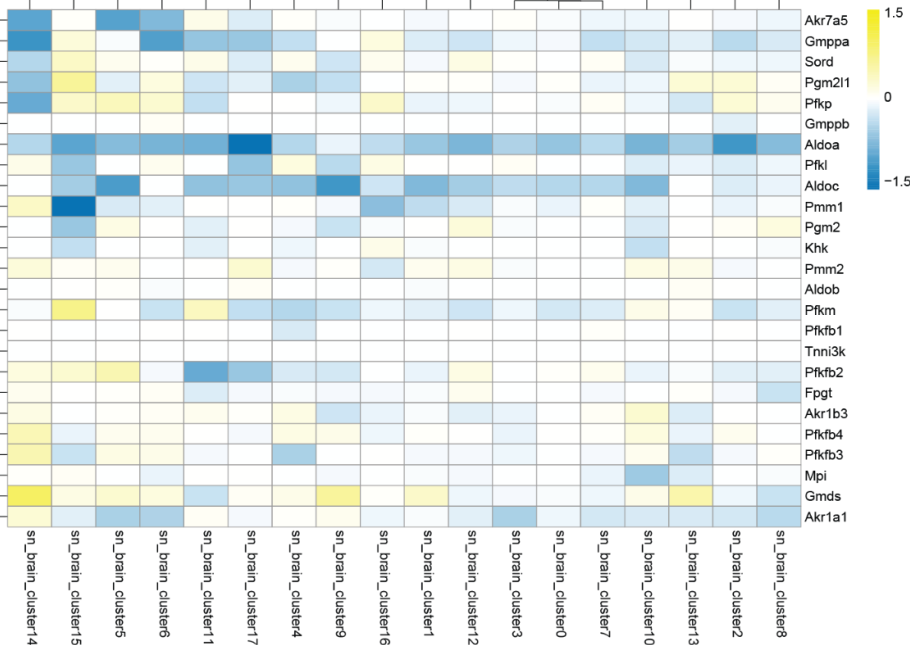



**Supplementary Figure 8:** Heatmap showing log<sub>2</sub> FC between flight and ground control samples in fructose and mannose metabolism pathway in both ST and multiomics datasets.

**Supplementary Table 1: Multiomics cluster marker genes.** Marker genes identified for each of the 18 clusters identified in the multiomics clusters of RR3 brain data.

**Supplementary Table 2: Multiomics clusters annotations.** Functional annotations of the 18 (0-17) multiomics clusters identified in the multiomics brain dataset according to functions. Cluster Annotation column denotes the shorter names for these cluster annotations.

**Supplementary Table 3: Differentially expressed genes (DEGs) for multiomics clusters.** DEGs identified for the 18 multiomics clusters in the spaceflight samples of RR3 brain data.

**Supplementary Table 4: ST clusters annotation.** Categorization of the 18 (0-17) ST clusters identified in the spatial dataset according to their spatial location and function.

**Supplementary Table 5: ST cluster marker genes.** Marker genes identified for the 18 spatial (ST) clusters in RR3 brain data.

**Supplementary Table 6: DEGs for ST clusters.** Differentially expressed genes for spaceflight samples found across the 18 ST RR3 brain clusters.

**Supplementary Table 7: Deconvolution results using Stereoscope.** ST clusters that matched with celltype proportions (multiomics clusters) found by deconvolution using Stereoscope.

**Supplementary Table 8: Motif analysis.** Top 10 motifs analysed for multiomics clusters using ATACseq peaks.

**Supplementary Table 9: Metabolic analysis results for ST dataset.** FGSEA results with adjusted p-values for spatial (ST) RR3 brain clusters.

**Supplementary Table 10: Metabolic analysis results for multiomics dataset.** FGSEA results with adjusted p-values for multiomics (snRNA-seq and snATAC-seq combined) RR3 brain clusters.
