# Supplementary material for: Spatially resolved multiomics on the neuronal effects induced by spaceflight
Source: Research Square preprint supplement (doi:10.21203/rs.3.rs-2865086/v1), 2023-05-31
Supplement: Supplementary file 2 [file 6465a956e3c11cceffdbf369.xlsx]

## Sheet: Sheet1
Supplementary Table 4: ST clusters annotation. Categorization of the 18 (0-17) ST clusters identified in the spatial dataset according to their spatial location and function.
Cluster ID	Cluster Annotation	Functions
0	Midbrain neurons	GABAergic synapses, neurodevelopment in midbrain
1	Cortical neurons, top layers	Neuronal projection development, K channels in somatosensory, motor, visual cortex (top layers)
2	Neuroendocrine neurons	Neuroendocrine functions and dopaminergic neurogenesis in hypothalamus and pituitary
3	Amygdalar and piriform neurons	Axon guidance and neuronal development in piriform cortex and cortical amygdalar areas
4	White matter	Myelination in white matter (corpus callosum, stria terminalis and cerebral peduncles)
5	Thalamic neurons	Oxidative stress (mitochondrial peroxisomes, metabolism) and neuronal development and functions in thalamus
6	Hippocampal CA1 neurons, pyramidal layer	Neuronal and synaptic development (including transcription and post-transcriptional modifications) and signaling in hippocampus CA1 region, pyramidal layer
7	Auditory and entorhinal neurons	Neuronal development and neuronal activity in auditory and entorhinal cortex
8	Hippocampal CA3 neurons	Synapses and metabolism in hippocampus CA3 region
9	Cortical neurons, bottom layers	Axon guidance and cell migration in somatosensory, motor, visual cortex (bottom layers)
10	Hippocampal CA1 neurons, stratum radiatum	Neuronal and synaptic development in hippocampus CA1 region, stratum radiatum
11	Dentate gyrus neurons	Cell development and migration in dentate gyrus
12	Corpus callosum	Neuronal and oligodendrocyte development and functions in corpus callosum
13	Neurovasculature	Neurovasculature
14	Caudate/putamen neurons	Dopaminergic signaling in caudate/putamen and medial amygdala
15	Retrosplenial neurons	Neuronal development in retrosplenial cortex
16	Choroid plexus and subventricular structures	Neurons and glia around ventricles and in choroid plexus
17	Choroid plexus	Transport, motility and cytoskeleton in choroid plexus
