# Supplementary material for: Spatially resolved multiomics on the neuronal effects induced by spaceflight
Source: Research Square preprint supplement (doi:10.21203/rs.3.rs-2865086/v1), 2023-05-31
Supplement: Supplementary file 3 [file 66bc8998ee38aa0894de1a3a.xlsx]

## Sheet: Sheet1
Supplementary Table 6: DEGs for ST clusters. Differentially expressed genes for spaceflight samples found across the 18 ST RR3 brain clusters.
primerid	coef	p_val	fdr	cluster
Olfm1	0.3697	5e-07	0.0051	2
Pou3f1	0.5727	4.4e-06	0.019	6
Atp2b1	0.7529	4.9e-06	0.019	6
Epha4	0.6781	5.5e-06	0.019	6
Satb2	0.26	9.1e-06	0.024	6
Ncald	0.6329	1.00E-06	0.009	8
Nnat	-0.861	1.70E-06	0.009	8
Rhob	0.4878	7.50E-06	0.027	8
Adcy1	0.7067	2.00E-05	0.039	8
Arpc2	0.4608	2.20E-05	0.039	8
Pnck	-0.3509	2.40E-05	0.039	8
Cpne7	-0.913	2.60E-05	0.039	8
Nbea	0.3263	2.90E-05	0.039	8
Mef2a	0.3564	3.50E-05	0.04	8
Itpr1	0.2455	4.00E-05	0.04	8
Fam19a1	0.343	4.10E-05	0.04	8
Ly6h	-0.4457	5.10E-05	0.043	8
Pink1	-0.1039	5.20E-05	0.043	8
Sec14l1	0.2976	5.60E-05	0.043	8
Rapgef5	0.2986	6.40E-05	0.046	8
Ier5	0.2168	6.80E-05	0.046	8
Arap2	0.1898	7.90E-05	0.048	8
Ubl3	0.3445	7.90E-05	0.048	8
Snph	-0.1696	9.00E-05	0.049	8
Skil	0.255	9.60E-05	0.049	8
Srsf5	0.2869	9.60E-05	0.049	8
Ppp1r1b	0.4548	6.2e-06	0.032	9
Hbb-bs	0.5671	6.6e-06	0.032	9
Cry1	-0.0583	2.4e-05	0.032	9
Anp32e	0.3455	3.3e-05	0.032	9
Cops7a	0.3976	4.4e-05	0.032	9
Lhfp	0.1895	4.6e-05	0.032	9
Gadd45g	-0.2909	5.2e-05	0.032	9
Aldh7a1	-0.0462	5.3e-05	0.032	9
Gadd45b	-0.2752	5.3e-05	0.032	9
Slc17a6	0.1427	5.6e-05	0.032	9
Rapgef4	0.5165	6e-05	0.032	9
Ly6h	-0.2687	6.4e-05	0.032	9
Zfp91	0.3287	6.6e-05	0.032	9
Olig1	0.3519	7e-05	0.032	9
Fam43a	0.1333	7.1e-05	0.032	9
Tspan2	0.2772	7.1e-05	0.032	9
Tmem136	0.114	7.6e-05	0.032	9
Hint2	-0.2241	8.1e-05	0.032	9
Nrbp2	-0.1778	8.2e-05	0.032	9
B2m	0.4073	8.3e-05	0.032	9
Selenop	0.5421	8.7e-05	0.032	9
Hs1bp3	-0.0238	9.2e-05	0.032	9
Ugp2	0.3007	9.2e-05	0.032	9
Car7	-0.1124	9.6e-05	0.032	9
Tgfa	0.1279	9.7e-05	0.032	9
Sertad1	-0.2109	9.9e-05	0.032	9
Camk1d	0.3677	0.0001	0.032	9
Mrpl38	-0.1104	0.0001	0.032	9
Ablim3	-0.0295	0.00011	0.032	9
Arrb2	-0.2145	0.00011	0.032	9
Fat3	0.1897	0.00011	0.032	9
Smpd3	-0.077	0.00011	0.032	9
Aldh18a1	-0.0191	0.00012	0.032	9
Chkb	-0.0772	0.00012	0.032	9
Fads6	0.0456	0.00012	0.032	9
Nfic	0.3796	0.00012	0.032	9
Ugcg	0.4397	0.00012	0.032	9
Flna	-0.1307	0.00013	0.032	9
Hace1	0.2392	0.00013	0.032	9
Stk40	-0.1115	0.00013	0.032	9
Cdkn2aipnl	-0.0744	0.00014	0.032	9
Fxn	-0.0501	0.00014	0.032	9
Lrrc58	0.5065	0.00014	0.032	9
Szrd1	-0.0483	0.00015	0.032	9
Adam22	0.4038	0.00016	0.032	9
Eif4ebp2	-0.048	0.00016	0.032	9
Matn2	-0.0507	0.00016	0.032	9
Rab3b	-0.2191	0.00016	0.032	9
Rpp25	-0.0857	0.00016	0.032	9
Tnfrsf21	0.3511	0.00016	0.032	9
Kctd3	0.3233	0.00018	0.032	9
Nrsn2	-0.2234	0.00018	0.032	9
Slc2a13	0.2888	0.00018	0.032	9
Actr3b	0.4172	0.00019	0.032	9
Numb	0.2348	0.00019	0.032	9
P2ry12	0.1131	0.00019	0.032	9
Riox1	-0.044	0.00019	0.032	9
6430548M08Rik	0.3535	0.00021	0.032	9
Isyna1	-0.1697	0.00021	0.032	9
Pard6a	-0.0562	0.00021	0.032	9
Rab31	0.177	0.00021	0.032	9
Adam23	0.4853	0.00022	0.032	9
Slc5a6	-0.0607	0.00022	0.032	9
Srrd	-0.062	0.00022	0.032	9
Ugt8a	0.2227	0.00022	0.032	9
Usp12	0.1862	0.00022	0.032	9
Commd9	-0.1745	0.00023	0.032	9
Tapbp	-0.063	0.00024	0.032	9
Tspyl2	-0.0995	0.00024	0.032	9
Kcnt2	0.1417	0.00025	0.032	9
Slc33a1	0.1461	0.00025	0.032	9
Carmil3	-0.0383	0.00026	0.032	9
Kcnv1	0.3471	0.00026	0.032	9
Tspan31	-0.1322	0.00026	0.032	9
Rassf1	-0.0759	0.00028	0.032	9
Armc5	-0.0361	0.00029	0.032	9
Asl	-0.048	0.00029	0.032	9
Tbc1d10b	0.2612	0.00029	0.032	9
Cbln4	0.0661	0.0003	0.032	9
Mest	-0.0702	0.0003	0.032	9
Mrpl1	0.1142	0.0003	0.032	9
Tmem163	0.102	0.0003	0.032	9
Atrip	-0.081	0.00031	0.032	9
Caskin2	-0.04	0.00031	0.032	9
Slmap	0.273	0.00031	0.032	9
Timm22	0.3667	0.00031	0.032	9
Tmem150c	-0.049	0.00031	0.032	9
D430041D05Rik	0.3819	0.00032	0.032	9
Ergic1	0.2912	0.00032	0.032	9
Mosmo	0.2492	0.00032	0.032	9
Pvr	-0.0511	0.00032	0.032	9
Spr	-0.2297	0.00032	0.032	9
Plpp7	-0.0433	0.00033	0.032	9
Slc35d1	-0.0341	0.00033	0.032	9
Mroh1	-0.1096	0.00034	0.032	9
Nmt2	0.3084	0.00034	0.032	9
Rap1gds1	0.4832	0.00034	0.032	9
Arhgef12	0.3523	0.00035	0.032	9
Kcnc1	0.3224	0.00035	0.032	9
Frmpd4	0.2523	0.00036	0.032	9
Pck2	-0.0502	0.00036	0.032	9
Pid1	0.1272	0.00036	0.032	9
Rfng	-0.0842	0.00036	0.032	9
Terf2ip	0.2414	0.00036	0.032	9
Tmem138	-0.0441	0.00036	0.032	9
Wscd2	-0.0358	0.00036	0.032	9
Agfg1	0.2987	0.00037	0.032	9
Pitpnc1	0.3893	0.00037	0.032	9
Lrrc73	-0.1379	0.00039	0.032	9
Ptpn1	-0.032	0.00039	0.032	9
Scarb2	0.3549	0.00039	0.032	9
Unc50	0.2513	0.00039	0.032	9
Cnpy2	-0.0411	0.0004	0.032	9
Plekhn1	-0.179	0.0004	0.032	9
Plgrkt	-0.016	0.0004	0.032	9
Slitrk1	0.4659	0.0004	0.032	9
Kif21b	-0.1756	0.00041	0.032	9
Pld2	-0.0633	0.00041	0.032	9
Sh3gl3	0.1827	0.00041	0.032	9
Zfp385a	-0.0062	0.00041	0.032	9
Fosl2	-0.1443	0.00042	0.032	9
Gas6	0.2714	0.00042	0.032	9
Penk	0.249	0.00042	0.032	9
Pygo2	-0.0998	0.00042	0.032	9
Cpne7	-0.212	0.00043	0.032	9
Emc7	0.4022	0.00043	0.032	9
Imp3	-0.1008	0.00043	0.032	9
Mogs	-0.0716	0.00043	0.032	9
Oprk1	0.1237	0.00043	0.032	9
Pdcd10	0.2365	0.00043	0.032	9
Srsf10	-0.0121	0.00043	0.032	9
Bcl7c	-0.0506	0.00044	0.032	9
Sec14l1	0.4524	0.00044	0.032	9
Ythdf1	-0.0705	0.00044	0.032	9
Aamdc	-0.1327	0.00045	0.032	9
Abcf1	-0.0904	0.00045	0.032	9
Dnajc21	0.1411	0.00045	0.032	9
Hba-a2	0.4422	0.00045	0.032	9
Nfil3	-0.0939	0.00045	0.032	9
Sema7a	0.5351	0.00045	0.032	9
Hdhd3	-0.0318	0.00046	0.032	9
Nprl2	-0.1826	0.00046	0.032	9
Pak7	0.3121	0.00046	0.032	9
Stim2	0.2695	0.00046	0.032	9
Tmtc1	0.1465	0.00046	0.032	9
Traf7	-0.1779	0.00046	0.032	9
2610507B11Rik	0.2844	0.00047	0.032	9
Bola1	-0.0728	0.00047	0.032	9
Fcor	-0.0182	0.00047	0.032	9
Tbata	-0.0496	0.00047	0.032	9
Acsl3	0.3417	0.00048	0.032	9
Camk2d	0.2826	0.00048	0.032	9
Rbm22	-0.0388	0.00048	0.032	9
Zmym2	0.2632	0.00048	0.032	9
Bcat2	-0.0361	0.00049	0.032	9
Grsf1	0.2421	0.00049	0.032	9
Nipsnap2	0.2742	0.00049	0.032	9
Slu7	0.1715	0.00049	0.032	9
Adgrl2	0.2492	0.00051	0.032	9
Gad2	0.2734	0.00051	0.032	9
Lrsam1	-0.0278	0.00051	0.032	9
Mcrip2	-0.1284	0.00051	0.032	9
Vhl	-0.0467	0.00051	0.032	9
Ccdc184	-0.0992	0.00052	0.032	9
Ctcf	-0.0922	0.00052	0.032	9
Dip2b	0.3499	0.00052	0.032	9
Pou6f2	0.0424	0.00052	0.032	9
Anks6	-0.0973	0.00053	0.032	9
Chchd5	-0.0554	0.00053	0.032	9
Orai2	0.1491	0.00053	0.032	9
Tmem196	0.2741	0.00053	0.032	9
Alcam	0.4242	0.00054	0.032	9
Retreg2	0.3016	0.00054	0.032	9
1110008F13Rik	0.2415	0.00055	0.032	9
Brms1l	0.2193	0.00055	0.032	9
Cic	0.0171	0.00055	0.032	9
Iffo1	-0.0864	0.00055	0.032	9
Msantd4	0.2168	0.00055	0.032	9
Naa20	0.4632	0.00055	0.032	9
Kcnh1	0.3236	0.00056	0.033	9
Sumf2	0.0423	0.00057	0.033	9
Trpm2	-0.0594	0.00057	0.033	9
Klhl29	0.1576	0.00058	0.033	9
Acta1	-0.0264	0.00059	0.033	9
Kcnq3	0.4503	0.00059	0.033	9
Osbpl3	-0.0204	0.00059	0.033	9
Rab40c	-0.1704	0.0006	0.033	9
Tmem215	0.0516	0.0006	0.033	9
Xpr1	0.3289	0.0006	0.033	9
Ap3m1	-0.037	0.00061	0.033	9
BC005624	0.2271	0.00061	0.033	9
Sdhd	0.4121	0.00061	0.033	9
5730409E04Rik	-0.0239	0.00062	0.033	9
Kremen1	0.1255	0.00062	0.033	9
Snx9	0.0707	0.00062	0.033	9
Arxes1	-0.0322	0.00063	0.033	9
Cyfip1	0.1889	0.00063	0.033	9
Msto1	-0.0443	0.00063	0.033	9
Cab39	0.3523	0.00064	0.033	9
Mrps15	-0.1503	0.00064	0.033	9
Sf3b4	0.1971	0.00064	0.033	9
Zc3h7b	0.305	0.00064	0.033	9
Ebf4	-0.0632	0.00065	0.033	9
Gdpd1	0.193	0.00065	0.033	9
Gtdc1	0.2382	0.00065	0.033	9
Haus7	-0.0186	0.00065	0.033	9
Rnd2	-0.0249	0.00065	0.033	9
Mlst8	-0.0493	0.00066	0.033	9
Prodh	-0.0401	0.00066	0.033	9
Trmt1	-0.1753	0.00066	0.033	9
Zxdc	-0.0274	0.00066	0.033	9
Cyb5b	0.3041	0.00067	0.033	9
Iqsec3	0.0943	0.00067	0.033	9
Rbm14	-0.0357	0.00067	0.033	9
Dalrd3	-0.1313	0.00068	0.033	9
Bpnt1	0.1683	0.00069	0.033	9
Ggps1	0.1638	0.00069	0.033	9
Mpped2	0.2205	0.00069	0.033	9
Acadsb	-0.0979	0.0007	0.033	9
Camkk2	0.3933	0.0007	0.033	9
Creld1	-0.1555	0.0007	0.033	9
Pex5l	0.3359	0.0007	0.033	9
Ado	0.1522	0.00071	0.033	9
Dmap1	-0.1461	0.00071	0.033	9
Htr2a	0.1437	0.00071	0.033	9
Pnpla6	-0.0306	0.00071	0.033	9
Acyp2	0.3153	0.00072	0.033	9
Cfap69	-0.0465	0.00072	0.033	9
Grb2	0.32	0.00072	0.033	9
Rnf32	-0.0675	0.00072	0.033	9
Coro1c	-0.059	0.00074	0.033	9
Cs	0.3728	0.00074	0.033	9
Dleu7	-0.0278	0.00075	0.033	9
Eipr1	-0.0816	0.00075	0.033	9
Gpr37	0.2552	0.00075	0.033	9
Lztr1	0.0909	0.00075	0.033	9
Pip5k1a	0.2036	0.00075	0.033	9
Teddm2	-0.0317	0.00076	0.033	9
Ntan1	-0.1686	0.00077	0.033	9
Pim3	-0.1257	0.00077	0.033	9
Trim39	-0.0664	0.00078	0.033	9
Hexb	0.3109	0.00079	0.033	9
Pitpnm3	0.2224	0.00079	0.033	9
Ccdc107	-0.1428	0.0008	0.033	9
Eif2s3x	0.364	0.0008	0.033	9
Fkbp14	-0.0196	0.0008	0.033	9
Luzp2	0.277	0.0008	0.033	9
Aktip	0.459	0.00081	0.033	9
Fsd1	-0.1923	0.00081	0.033	9
Gfm1	0.1648	0.00081	0.033	9
Il11ra1	-0.0406	0.00081	0.033	9
Vamp3	-0.029	0.00081	0.033	9
Arfgef1	0.2481	0.00083	0.033	9
Hapln4	0.0541	0.00084	0.033	9
Ifngr2	0.1344	0.00084	0.033	9
Ccng2	0.1685	0.00085	0.033	9
Dpm2	-0.1543	0.00085	0.033	9
Drd1	0.0914	0.00085	0.033	9
Med16	-0.0617	0.00085	0.033	9
Papd5	0.1567	0.00085	0.033	9
Igsf11	0.0818	0.00086	0.033	9
Tns3	0.0951	0.00086	0.033	9
Zfp655	-0.027	0.00086	0.033	9
Dld	0.4985	0.00087	0.033	9
Pdzd11	-0.0809	0.00087	0.033	9
Atf6	0.3384	0.00088	0.033	9
Polr1a	-0.0218	0.00088	0.033	9
Btbd3	0.2694	0.00089	0.033	9
Enpp2	0.3842	0.00089	0.033	9
Pde4b	0.3818	0.00089	0.033	9
Tm7sf3	0.1201	0.00089	0.033	9
Tnpo1	0.1488	0.00089	0.033	9
Adra2c	0.1329	0.0009	0.033	9
Fam98a	-0.1322	0.0009	0.033	9
Rab15	0.2832	0.0009	0.033	9
Tmem28	-0.0132	0.0009	0.033	9
Ube2k	0.3902	0.0009	0.033	9
Gnl2	-0.0389	0.00091	0.033	9
Sf1	-0.0579	0.00091	0.033	9
Gart	-0.0515	0.00092	0.033	9
Glrx3	0.0222	0.00092	0.033	9
Mrps24	-0.0385	0.00092	0.033	9
Pth1r	-0.0247	0.00092	0.033	9
Becn1	0.34	0.00093	0.033	9
Fam135a	-0.0235	0.00093	0.033	9
Fh1	0.3142	0.00093	0.033	9
Gm13306	0.0428	0.00093	0.033	9
Gm13889	-0.0713	0.00093	0.033	9
Lamp5	0.2356	0.00093	0.033	9
Myh10	0.3525	0.00093	0.033	9
Sox2	0.1568	0.00093	0.033	9
Erc1	0.11	0.00094	0.033	9
Fam234b	-0.1058	0.00094	0.033	9
Gclm	0.2191	0.00094	0.033	9
Abce1	0.2814	0.00095	0.033	9
Fnbp1	0.2253	0.00095	0.033	9
Llph	-0.0625	0.00095	0.033	9
Sema3f	-0.0246	0.00095	0.033	9
Bpgm	0.0063	0.00096	0.033	9
Extl2	0.2687	0.00096	0.033	9
Gpr88	0.141	0.00096	0.033	9
Mat2a	-0.0242	0.00096	0.033	9
Agpat5	0.1888	0.00097	0.033	9
Itpkc	-0.0356	0.00097	0.033	9
Zxdb	0.1417	0.00097	0.033	9
Phf23	-0.0024	0.00098	0.033	9
Zmat5	-0.068	0.00098	0.033	9
Znhit2	-0.1256	0.00098	0.033	9
Borcs7	0.2425	0.00099	0.033	9
Gatb	-0.0455	0.00099	0.033	9
Maneal	0.1737	0.00099	0.033	9
Cadps2	0.3614	0.001	0.033	9
Camkk1	0.2647	0.001	0.033	9
Crocc	-0.1231	0.001	0.033	9
Gtf2h4	-0.0597	0.001	0.033	9
Ipo7	0.2883	0.001	0.033	9
Kcnh7	0.4993	0.001	0.033	9
Mical2	0.3889	0.001	0.033	9
Rora	0.2576	0.001	0.033	9
Tmem101	-0.0118	0.001	0.033	9
Vgf	0.477	0.001	0.033	9
Zbtb2	-0.0299	0.001	0.033	9
Zfp593	-0.0276	0.001	0.033	9
Zhx2	0.0454	0.001	0.033	9
Abcb9	-0.0746	0.0011	0.033	9
Atg3	0.2233	0.0011	0.033	9
Bloc1s3	0.0459	0.0011	0.033	9
Capn5	-0.0861	0.0011	0.033	9
Ccdc91	-0.0064	0.0011	0.033	9
Colgalt1	-0.0926	0.0011	0.033	9
Dhx35	-0.049	0.0011	0.033	9
Dvl3	0.154	0.0011	0.033	9
Fbxo41	-0.116	0.0011	0.033	9
Hars2	-0.0054	0.0011	0.033	9
Hbb-bt	0.1396	0.0011	0.033	9
Irf2	0.1213	0.0011	0.033	9
Klc4	-0.0651	0.0011	0.033	9
Mfsd12	-0.0461	0.0011	0.033	9
Naa16	-0.0223	0.0011	0.033	9
Ncoa5	-0.064	0.0011	0.033	9
Necab3	-0.0074	0.0011	0.033	9
Opalin	-0.1203	0.0011	0.033	9
Oxa1l	-0.0576	0.0011	0.033	9
Pex14	0.2123	0.0011	0.033	9
Pigq	-0.1001	0.0011	0.033	9
Pnck	-0.1974	0.0011	0.033	9
Psen2	-0.0464	0.0011	0.033	9
Rbfa	-0.1084	0.0011	0.033	9
Rgma	0.2321	0.0011	0.033	9
Rims1	0.3369	0.0011	0.033	9
Rragd	0.303	0.0011	0.033	9
Slc20a1	0.2721	0.0011	0.033	9
Slc38a2	0.3124	0.0011	0.033	9
St6gal2	0.2745	0.0011	0.033	9
Tmem33	0.4063	0.0011	0.033	9
Tril	0.1038	0.0011	0.033	9
Unk	-0.0732	0.0011	0.033	9
Abhd16a	0.2765	0.0012	0.033	9
Adck5	-0.0915	0.0012	0.033	9
Apc2	-0.0693	0.0012	0.033	9
Arfgap1	-0.0493	0.0012	0.033	9
Brinp3	0.1588	0.0012	0.033	9
Car10	0.3302	0.0012	0.033	9
Ccser2	0.2179	0.0012	0.033	9
Cntrl	-0.0198	0.0012	0.033	9
Cwc25	-0.0287	0.0012	0.033	9
Dgkq	-0.0817	0.0012	0.033	9
Fibp	-0.0737	0.0012	0.033	9
Gcsh	0.2116	0.0012	0.033	9
Gnpat	0.1395	0.0012	0.033	9
Mat2b	0.3856	0.0012	0.033	9
Nol4	0.2422	0.0012	0.033	9
Nr2f2	0.085	0.0012	0.033	9
Pnma3	-0.0337	0.0012	0.033	9
Ppp6r3	0.0013	0.0012	0.033	9
Ptpn23	-0.1293	0.0012	0.033	9
Rab18	0.4011	0.0012	0.033	9
Rgs4	0.4704	0.0012	0.033	9
Rtca	0.1713	0.0012	0.033	9
Sgip1	0.4975	0.0012	0.033	9
Spcs1	0.3244	0.0012	0.033	9
St8sia5	-0.1173	0.0012	0.033	9
Tbc1d22a	-0.0515	0.0012	0.033	9
Timmdc1	0.0656	0.0012	0.033	9
Trhde	0.1714	0.0012	0.033	9
Wipi2	-0.0595	0.0012	0.033	9
Xndc1	-0.0231	0.0012	0.033	9
Yaf2	0.3889	0.0012	0.033	9
Zfp689	-0.0148	0.0012	0.033	9
Aimp2	-0.0634	0.0013	0.033	9
Akr7a5	-0.1149	0.0013	0.033	9
Bcan	-0.0282	0.0013	0.033	9
Cuta	-0.0335	0.0013	0.033	9
Cutc	-0.0183	0.0013	0.033	9
Donson	-0.0576	0.0013	0.033	9
Eif2b2	-0.0625	0.0013	0.033	9
Eprs	-0.0621	0.0013	0.033	9
Fam174a	0.3911	0.0013	0.033	9
Fbxl3	0.2141	0.0013	0.033	9
Gabra4	0.2644	0.0013	0.033	9
Glrx	0.2317	0.0013	0.033	9
Gtf2ird2	-0.0293	0.0013	0.033	9
Hba-a1	0.2132	0.0013	0.033	9
Hivep2	0.4095	0.0013	0.033	9
Map6d1	0.1295	0.0013	0.033	9
Mzf1	-0.0206	0.0013	0.033	9
Nt5c	-0.3823	0.0013	0.033	9
Ntmt1	-0.1049	0.0013	0.033	9
Pkdcc	-0.0304	0.0013	0.033	9
Pole4	0.2619	0.0013	0.033	9
Ppfia1	-0.0521	0.0013	0.033	9
Qk	0.5277	0.0013	0.033	9
Rab1b	-0.0229	0.0013	0.033	9
Sema6d	0.1557	0.0013	0.033	9
Svip	0.1722	0.0013	0.033	9
Tarbp2	-0.0917	0.0013	0.033	9
Tm9sf4	-0.0442	0.0013	0.033	9
Tpbg	0.197	0.0013	0.033	9
Tubg2	-0.0961	0.0013	0.033	9
Usp32	0.4245	0.0013	0.033	9
Yif1a	0.0713	0.0013	0.033	9
Zfp865	-0.0805	0.0013	0.033	9
Alkbh8	0.1423	0.0014	0.033	9
Amacr	0.0724	0.0014	0.033	9
Atp2b2	0.3566	0.0014	0.033	9
Atrn	0.2771	0.0014	0.033	9
Borcs5	-0.0185	0.0014	0.034	9
Chic1	-0.0443	0.0014	0.033	9
Enkd1	-0.0449	0.0014	0.034	9
Fads3	-0.1332	0.0014	0.033	9
Fbxw2	0.1964	0.0014	0.033	9
Golim4	0.0557	0.0014	0.033	9
Igfbp7	0.1075	0.0014	0.033	9
Kif1c	0.1143	0.0014	0.033	9
Lrrn1	0.2433	0.0014	0.034	9
Mcu	0.1088	0.0014	0.034	9
Mettl16	-0.0304	0.0014	0.033	9
Myh7b	-0.0241	0.0014	0.033	9
Nhs	0.0555	0.0014	0.033	9
Nsa2	0.206	0.0014	0.033	9
Pgls	-0.1002	0.0014	0.034	9
Ppil2	-0.1579	0.0014	0.033	9
Pum3	-0.0295	0.0014	0.033	9
Rap1a	0.2458	0.0014	0.033	9
Rapgef5	0.2322	0.0014	0.033	9
Rmnd5a	0.333	0.0014	0.034	9
Rxra	-0.0053	0.0014	0.033	9
Sap30	0.0513	0.0014	0.033	9
Spata2l	-0.1323	0.0014	0.033	9
Xpo5	-0.0163	0.0014	0.033	9
Adam33	-0.025	0.0015	0.034	9
Anp32b	0.188	0.0015	0.034	9
B9d1	-0.0918	0.0015	0.034	9
Cep126	0.1026	0.0015	0.034	9
Chid1	-0.0268	0.0015	0.034	9
Cryzl1	0.2534	0.0015	0.034	9
Dmpk	-0.0545	0.0015	0.034	9
Edem2	-0.0971	0.0015	0.034	9
Gpat4	-0.0852	0.0015	0.034	9
Gtf3c5	-0.0142	0.0015	0.034	9
Hdac6	-0.1086	0.0015	0.034	9
Hddc3	-0.0003	0.0015	0.034	9
Mapk11	-0.2054	0.0015	0.034	9
Myh7	-0.0246	0.0015	0.034	9
Pank3	0.1628	0.0015	0.034	9
Plekhj1	-0.1214	0.0015	0.034	9
Rbck1	-0.051	0.0015	0.034	9
Rce1	-0.0544	0.0015	0.034	9
Samd14	-0.056	0.0015	0.034	9
Sc5d	0.1773	0.0015	0.034	9
Scp2	0.3188	0.0015	0.034	9
Slc25a19	-0.138	0.0015	0.034	9
Tceal8	0.0058	0.0015	0.034	9
Tmem132a	-0.2533	0.0015	0.034	9
Tmem178b	0.4369	0.0015	0.034	9
Tmem229b	-0.0414	0.0015	0.034	9
Tspan14	0.1094	0.0015	0.034	9
Xab2	-0.0792	0.0015	0.034	9
Arntl	0.1651	0.0016	0.034	9
C1qb	-0.0406	0.0016	0.034	9
Ccdc36	0.2415	0.0016	0.034	9
Cisd2	0.2571	0.0016	0.034	9
Coro7	-0.1423	0.0016	0.034	9
Cxadr	-0.09	0.0016	0.034	9
D10Jhu81e	-0.1287	0.0016	0.034	9
Depdc5	-0.0166	0.0016	0.034	9
Ech1	-0.1285	0.0016	0.034	9
Epas1	0.2245	0.0016	0.034	9
Epm2aip1	0.2917	0.0016	0.034	9
Fundc2	0.0668	0.0016	0.034	9
Lsm14b	0.202	0.0016	0.034	9
Map3k13	0.0858	0.0016	0.034	9
Mecr	-0.106	0.0016	0.034	9
Mob3a	-0.0181	0.0016	0.034	9
Mrnip	-0.0246	0.0016	0.034	9
Ninj1	-0.06	0.0016	0.034	9
Nudt14	-0.0323	0.0016	0.034	9
Pag1	0.0685	0.0016	0.034	9
Pgam5	0.3012	0.0016	0.034	9
Rundc3b	0.1781	0.0016	0.034	9
Scmh1	-0.1094	0.0016	0.034	9
Shisa5	0.0271	0.0016	0.034	9
Slc4a4	0.3763	0.0016	0.034	9
Syvn1	0.1435	0.0016	0.034	9
Tmem199	0.1782	0.0016	0.034	9
Trpm7	0.1481	0.0016	0.034	9
Tspan5	0.3936	0.0016	0.034	9
Ttyh1	0.3768	0.0016	0.034	9
Tubg1	-0.2486	0.0016	0.034	9
Zfp821	-0.1346	0.0016	0.034	9
AI854703	-0.0363	0.0017	0.034	9
Ahdc1	0.1832	0.0017	0.034	9
Akap5	0.1967	0.0017	0.034	9
Ccer2	-0.0265	0.0017	0.034	9
Coq7	-0.0618	0.0017	0.034	9
Ecsit	-0.1021	0.0017	0.034	9
Emc8	-0.0806	0.0017	0.034	9
Frmpd3	0.1072	0.0017	0.034	9
Gatad1	0.3567	0.0017	0.034	9
Gmppb	-0.0586	0.0017	0.034	9
Gpr158	0.2546	0.0017	0.034	9
Hmbox1	0.0122	0.0017	0.034	9
Hspa12a	0.2681	0.0017	0.034	9
Map3k4	-0.01	0.0017	0.034	9
Mrpl54	-0.2449	0.0017	0.034	9
Mrps21	-0.1656	0.0017	0.034	9
Os9	0.0079	0.0017	0.034	9
Ptpdc1	-0.0402	0.0017	0.034	9
Rictor	0.2193	0.0017	0.034	9
Satb2	0.3227	0.0017	0.034	9
Sccpdh	0.2136	0.0017	0.034	9
Shc2	-0.0236	0.0017	0.034	9
Sorcs3	0.2003	0.0017	0.034	9
Tmem121	-0.0239	0.0017	0.034	9
Tmem245	0.2396	0.0017	0.034	9
Tmem259	0.0357	0.0017	0.034	9
Trim11	-0.0694	0.0017	0.034	9
Ttll1	-0.12	0.0017	0.034	9
Ttr	0.7536	0.0017	0.034	9
Vps50	0.2801	0.0017	0.034	9
Zbtb10	-0.0206	0.0017	0.034	9
Zfp644	0.2549	0.0017	0.034	9
2410002F23Rik	-0.1627	0.0018	0.034	9
Acat1	0.5012	0.0018	0.034	9
Arhgef2	-0.1376	0.0018	0.034	9
Btbd10	0.4446	0.0018	0.034	9
Btbd9	-0.0663	0.0018	0.034	9
Cndp2	-0.0712	0.0018	0.034	9
Cnot10	-0.0155	0.0018	0.034	9
Cstf3	-0.0357	0.0018	0.034	9
Eef1d	-0.0355	0.0018	0.034	9
Exoc6b	-0.0548	0.0018	0.034	9
Fbxo3	0.2435	0.0018	0.034	9
Fbxo32	0.1272	0.0018	0.034	9
Hnmt	0.1497	0.0018	0.034	9
Lemd3	0.2896	0.0018	0.034	9
Mrpl9	0.0968	0.0018	0.034	9
Nacad	-0.0379	0.0018	0.034	9
Ndufs1	0.4396	0.0018	0.034	9
Nelfcd	-0.1423	0.0018	0.034	9
Nol4l	0.1204	0.0018	0.034	9
Npm3	-0.0317	0.0018	0.034	9
Ppm1l	0.3639	0.0018	0.034	9
Ptpro	-0.0286	0.0018	0.034	9
Slc12a9	-0.0499	0.0018	0.034	9
Slc1a2	0.3616	0.0018	0.034	9
Snd1	-0.0133	0.0018	0.034	9
Strn	0.2138	0.0018	0.034	9
Tagln2	-0.0224	0.0018	0.034	9
Tsnax	0.2939	0.0018	0.034	9
Ube2v2	0.4196	0.0018	0.034	9
Vps45	-0.1078	0.0018	0.034	9
Zfp335	-0.1158	0.0018	0.034	9
Auts2	0.379	0.0019	0.034	9
Cnot11	-0.0352	0.0019	0.034	9
Coq10a	-0.1226	0.0019	0.034	9
Cotl1	-0.0304	0.0019	0.034	9
Dnmt3a	0.2298	0.0019	0.034	9
Dvl2	-0.1278	0.0019	0.034	9
Fam184a	0.0722	0.0019	0.034	9
Fbxo34	0.2475	0.0019	0.034	9
Gatm	0.3282	0.0019	0.034	9
Gpr19	-0.0447	0.0019	0.034	9
H1f0	-0.0249	0.0019	0.034	9
Hhip	0.0402	0.0019	0.034	9
Idh2	-0.0993	0.0019	0.034	9
Morn4	-0.1332	0.0019	0.034	9
Nefl	0.436	0.0019	0.034	9
Nol3	-0.072	0.0019	0.034	9
Nolc1	-0.0627	0.0019	0.034	9
Pdcd6	0.0035	0.0019	0.034	9
Rab3ip	-0.0735	0.0019	0.034	9
Ralb	0.0792	0.0019	0.034	9
Slc5a5	-0.0322	0.0019	0.034	9
Spon1	0.23	0.0019	0.034	9
Sssca1	-0.1221	0.0019	0.034	9
Tle2	-0.0687	0.0019	0.034	9
Ttc7b	0.3388	0.0019	0.034	9
Vamp7	0.1353	0.0019	0.034	9
Yjefn3	-0.0862	0.0019	0.034	9
Zfp692	-0.1204	0.0019	0.034	9
4930430F08Rik	0.0776	0.002	0.034	9
Ank	0.5109	0.002	0.034	9
Brd3os	-0.0017	0.002	0.034	9
Cadps	0.2409	0.002	0.034	9
Cars2	-0.0486	0.002	0.034	9
Cers5	-0.0116	0.002	0.034	9
Crat	-0.1094	0.002	0.034	9
Creld2	-0.0908	0.002	0.034	9
Fars2	-0.0232	0.002	0.034	9
Klf3	0.0739	0.002	0.034	9
Man1b1	-0.0875	0.002	0.034	9
Ncoa2	0.3391	0.002	0.034	9
Nsd3	0.2085	0.002	0.034	9
Olfm3	0.3376	0.002	0.034	9
Polr3b	-0.0269	0.002	0.034	9
Prpf4b	0.013	0.002	0.034	9
Rilpl1	-0.0882	0.002	0.034	9
Smpd4	-0.2041	0.002	0.034	9
Tbrg1	0.0584	0.002	0.034	9
Terf1	-0.0164	0.002	0.034	9
Tmem38a	0.0172	0.002	0.034	9
Tnfrsf25	-0.0963	0.002	0.034	9
Trim23	0.2809	0.002	0.034	9
Ufsp2	0.2063	0.002	0.034	9
Zfr2	-0.1815	0.002	0.034	9
Anapc7	-0.1345	0.0021	0.034	9
Apmap	-0.0416	0.0021	0.034	9
Bex1	-0.3581	0.0021	0.034	9
Ccdc28b	-0.1725	0.0021	0.034	9
Chpt1	0.2554	0.0021	0.034	9
Clasrp	-0.2429	0.0021	0.034	9
Clint1	0.2046	0.0021	0.034	9
Clvs1	0.1499	0.0021	0.034	9
Ddx41	-0.1115	0.0021	0.034	9
Dpysl4	-0.098	0.0021	0.034	9
Eif5	0.4246	0.0021	0.034	9
Epdr1	0.3445	0.0021	0.034	9
Hid1	-0.1141	0.0021	0.034	9
Hsd17b10	-0.0198	0.0021	0.034	9
Josd1	-0.1425	0.0021	0.034	9
Mlc1	0.0117	0.0021	0.034	9
Nudt9	-0.0798	0.0021	0.034	9
Pdss2	-0.0165	0.0021	0.034	9
Plekha5	0.1921	0.0021	0.034	9
Poc1a	-0.0438	0.0021	0.034	9
Prickle2	0.2923	0.0021	0.034	9
Psme4	-0.0525	0.0021	0.034	9
Ptpn11	0.2679	0.0021	0.034	9
Rcc1	-0.0134	0.0021	0.034	9
Sec22b	0.2748	0.0021	0.034	9
Sh3kbp1	0.1155	0.0021	0.034	9
Slc12a2	0.1544	0.0021	0.034	9
Slc39a6	-0.0279	0.0021	0.034	9
Snx11	-0.0973	0.0021	0.034	9
Spred2	0.2889	0.0021	0.034	9
Stt3b	0.2112	0.0021	0.034	9
Trmt112	-0.1369	0.0021	0.034	9
Ttc17	-0.0458	0.0021	0.034	9
Ubl4a	-0.1098	0.0021	0.034	9
Unc119	-0.0646	0.0021	0.034	9
Ap1m1	-0.0362	0.0022	0.034	9
Arl6ip6	0.0818	0.0022	0.034	9
Axin2	0.1229	0.0022	0.034	9
Cdk11b	-0.0472	0.0022	0.034	9
Fahd2a	-0.0511	0.0022	0.034	9
Fbf1	-0.1594	0.0022	0.034	9
Gorasp2	0.0646	0.0022	0.034	9
Grk6	-0.0479	0.0022	0.034	9
Hdac8	-0.0374	0.0022	0.034	9
Kcnk3	-0.0714	0.0022	0.034	9
Ksr1	-0.0459	0.0022	0.034	9
Large1	0.4295	0.0022	0.034	9
Lmbrd2	0.5015	0.0022	0.034	9
Lrrtm3	0.2229	0.0022	0.034	9
Mrpl58	-0.1741	0.0022	0.034	9
Mterf4	-0.0148	0.0022	0.034	9
Naa10	-0.092	0.0022	0.034	9
Pqlc2	-0.034	0.0022	0.034	9
Ptges3l	-0.0405	0.0022	0.034	9
Rgs5	0.1655	0.0022	0.034	9
Sfxn4	-0.0731	0.0022	0.034	9
Sppl2b	-0.0901	0.0022	0.034	9
Tfam	0.1465	0.0022	0.034	9
Uhrf1bp1l	0.2995	0.0022	0.034	9
Vamp1	0.1614	0.0022	0.034	9
Vps8	-0.0877	0.0022	0.034	9
Ythdf3	0.2753	0.0022	0.034	9
Zdhhc12	-0.024	0.0022	0.034	9
Zscan21	-0.0757	0.0022	0.034	9
Arsb	0.3703	0.0023	0.034	9
BC005561	0.0755	0.0023	0.034	9
Dlg4	-0.1046	0.0023	0.034	9
Dnlz	-0.1525	0.0023	0.034	9
Eif1ad	-0.0497	0.0023	0.034	9
Eif3g	-0.0846	0.0023	0.034	9
Fgd1	-0.0218	0.0023	0.034	9
Gpr34	0.0599	0.0023	0.034	9
Kcnj10	0.5525	0.0023	0.034	9
Leprot	0.1146	0.0023	0.034	9
Lman1	0.1302	0.0023	0.034	9
Max	0.2309	0.0023	0.034	9
Myo9b	-0.1537	0.0023	0.034	9
Nup35	-0.0206	0.0023	0.034	9
Osbp	0.1483	0.0023	0.034	9
Pacs1	-0.0257	0.0023	0.034	9
Plcl1	0.1117	0.0023	0.034	9
Prrg2	-0.0199	0.0023	0.034	9
Reps1	-0.0465	0.0023	0.034	9
Sdccag3	-0.0276	0.0023	0.034	9
Sesn2	-0.0172	0.0023	0.034	9
Slc25a26	-0.0239	0.0023	0.034	9
Slc9a6	0.2989	0.0023	0.034	9
Slx1b	-0.0105	0.0023	0.034	9
Spout1	-0.1058	0.0023	0.034	9
Stoml2	-0.0794	0.0023	0.034	9
Sv2c	0.0564	0.0023	0.034	9
Tapt1	0.2335	0.0023	0.034	9
Tmf1	0.1668	0.0023	0.034	9
Ttc33	0.2301	0.0023	0.034	9
Yipf2	-0.0688	0.0023	0.034	9
Zc3h3	-0.0844	0.0023	0.034	9
Zmynd19	-0.0017	0.0023	0.034	9
1810043G02Rik	-0.1042	0.0024	0.034	9
Aqp11	-0.0252	0.0024	0.034	9
Cables1	0.0846	0.0024	0.035	9
Cys1	-0.0113	0.0024	0.034	9
Dcaf17	0.0714	0.0024	0.034	9
Ddx55	-0.0286	0.0024	0.034	9
Exosc5	-0.0763	0.0024	0.034	9
Golga2	0.0225	0.0024	0.034	9
Gpr26	0.4647	0.0024	0.034	9
Hopx	-0.0071	0.0024	0.034	9
Insig2	0.2031	0.0024	0.034	9
Msmo1	0.3076	0.0024	0.034	9
Necab2	-0.0746	0.0024	0.034	9
Nkain4	-0.1091	0.0024	0.034	9
Pam16	-0.1111	0.0024	0.034	9
Pank4	0.1145	0.0024	0.034	9
Pnkp	-0.0826	0.0024	0.034	9
Rab8b	0.1255	0.0024	0.034	9
Sf3a2	-0.0393	0.0024	0.034	9
Tet2	0.1339	0.0024	0.034	9
Uros	0.0798	0.0024	0.034	9
Ankrd13c	0.4324	0.0025	0.035	9
Aurkaip1	0.0851	0.0025	0.035	9
Cd320	0.0007	0.0025	0.035	9
Crk	0.3136	0.0025	0.035	9
Cstf1	-0.0349	0.0025	0.035	9
Dgkh	0.3976	0.0025	0.035	9
Dpp7	-0.0809	0.0025	0.035	9
Fam171a1	-0.0209	0.0025	0.035	9
Fgf13	0.3012	0.0025	0.035	9
Fgf14	0.1245	0.0025	0.035	9
Gstt1	-0.0453	0.0025	0.035	9
Gyg	-0.0237	0.0025	0.035	9
Klhl15	0.1665	0.0025	0.035	9
Pomc	-0.0429	0.0025	0.035	9
Ptcd2	-0.0492	0.0025	0.035	9
Ptpn3	0.1458	0.0025	0.035	9
Rnf7	0.2351	0.0025	0.035	9
Rp2	0.0472	0.0025	0.035	9
Scfd1	0.098	0.0025	0.035	9
Scrn3	0.1206	0.0025	0.035	9
Tcaim	-0.0158	0.0025	0.035	9
Zfp512b	-0.0007	0.0025	0.035	9
Bmpr1a	0.1931	0.0026	0.035	9
Fam3a	-0.0496	0.0026	0.035	9
Foxp4	-0.0769	0.0026	0.035	9
Gns	0.0128	0.0026	0.035	9
Impdh2	-0.0767	0.0026	0.035	9
Mak16	-0.0059	0.0026	0.035	9
Mrpl20	0.016	0.0026	0.035	9
Mthfsd	-0.0893	0.0026	0.035	9
Nedd9	0.0314	0.0026	0.035	9
Nek7	0.1665	0.0026	0.035	9
Ntn5	-0.1274	0.0026	0.035	9
Ppil3	0.0942	0.0026	0.035	9
Shkbp1	-0.0686	0.0026	0.035	9
Spag9	0.5043	0.0026	0.035	9
Tmed2	0.4126	0.0026	0.035	9
Tmem170b	0.2227	0.0026	0.035	9
Tmem25	-0.0877	0.0026	0.035	9
Tor1b	-0.09	0.0026	0.035	9
Trp53inp2	0.2601	0.0026	0.035	9
Wnk2	-0.0804	0.0026	0.035	9
0610037L13Rik	-0.0968	0.0027	0.035	9
Blvrb	-0.0887	0.0027	0.035	9
Cnppd1	-0.1024	0.0027	0.036	9
Dck	0.2378	0.0027	0.035	9
Fam207a	-0.0443	0.0027	0.035	9
Fam8a1	0.0221	0.0027	0.036	9
Fgf12	0.3801	0.0027	0.035	9
Kcnip4	0.18	0.0027	0.035	9
Kctd1	0.4197	0.0027	0.036	9
Man1a2	0.1916	0.0027	0.035	9
Mtmr2	0.0948	0.0027	0.035	9
Mybbp1a	-0.0795	0.0027	0.035	9
Pias4	-0.0291	0.0027	0.035	9
Praf2	0.0405	0.0027	0.035	9
Ptgr2	0.0993	0.0027	0.036	9
Rfc1	-0.0084	0.0027	0.035	9
Rrp7a	-0.0051	0.0027	0.035	9
Snapc4	-0.1003	0.0027	0.035	9
Spsb3	-0.1828	0.0027	0.035	9
Strip1	0.029	0.0027	0.035	9
Taf5	-0.0141	0.0027	0.035	9
Tpra1	-0.0083	0.0027	0.036	9
Zfp280d	0.2172	0.0027	0.036	9
Zfp612	0.0142	0.0027	0.036	9
Ap3s1	0.4156	0.0028	0.036	9
C4b	-0.0533	0.0028	0.036	9
Ccdc86	0.0009	0.0028	0.036	9
Crcp	-0.0774	0.0028	0.036	9
Dynlt3	0.2588	0.0028	0.036	9
Inha	-0.1253	0.0028	0.036	9
Klhl3	-0.0574	0.0028	0.036	9
Ltk	-0.0186	0.0028	0.036	9
Mrrf	-0.0178	0.0028	0.036	9
Nxt2	0.108	0.0028	0.036	9
Patj	0.0208	0.0028	0.036	9
Pop5	-0.0637	0.0028	0.036	9
Pxn	-0.0763	0.0028	0.036	9
Sh2d5	-0.0643	0.0028	0.036	9
Snn	0.2595	0.0028	0.036	9
Trp53bp2	-0.0042	0.0028	0.036	9
Vac14	-0.023	0.0028	0.036	9
Zfp263	-0.0024	0.0028	0.036	9
Zfp326	0.1327	0.0028	0.036	9
2610044O15Rik8	-0.0007	0.0029	0.036	9
Abcd1	-0.0111	0.0029	0.036	9
Acaa1a	-0.1047	0.0029	0.036	9
Amph	0.3194	0.0029	0.036	9
Cdk5	-0.071	0.0029	0.036	9
Cog4	-0.1365	0.0029	0.036	9
Cul1	0.1552	0.0029	0.036	9
Emc4	0.1128	0.0029	0.036	9
Golga3	-0.0207	0.0029	0.036	9
Hcfc1	0.1793	0.0029	0.036	9
Hspb1	-0.0451	0.0029	0.036	9
Kat7	-0.0447	0.0029	0.036	9
Lonp2	-0.0136	0.0029	0.036	9
Mapk4	0.1761	0.0029	0.036	9
Med1	0.1568	0.0029	0.036	9
Miga2	-0.1134	0.0029	0.036	9
Pdp1	0.3262	0.0029	0.036	9
Pex7	0.1155	0.0029	0.036	9
Riok1	-0.0124	0.0029	0.036	9
Sarm1	-0.0269	0.0029	0.036	9
Scd1	0.2675	0.0029	0.036	9
Sf3b6	0.3354	0.0029	0.036	9
Ssb	0.356	0.0029	0.036	9
Tdrd7	0.191	0.0029	0.036	9
Tpd52l2	-0.0605	0.0029	0.036	9
Wdr20	0.085	0.0029	0.036	9
Zfp106	0.3365	0.0029	0.036	9
Abcf2	-0.009	0.003	0.036	9
Acsf3	-0.0229	0.003	0.036	9
Adam9	0.204	0.003	0.037	9
Ap1g1	0.1746	0.003	0.036	9
C77080	0.0814	0.003	0.036	9
Cdc5l	-0.0573	0.003	0.036	9
Fam160b2	0.1006	0.003	0.036	9
Hibadh	0.2305	0.003	0.036	9
Ifi27	-0.1885	0.003	0.037	9
Mettl26	-0.043	0.003	0.036	9
Oat	0.2715	0.003	0.037	9
Pgam2	-0.0172	0.003	0.037	9
Psme1	-0.1204	0.003	0.037	9
Slc25a25	-0.0571	0.003	0.037	9
Taf1c	-0.0562	0.003	0.036	9
Tsc22d3	0.3237	0.003	0.036	9
Anks3	-0.1766	0.0031	0.037	9
Asb8	0.0347	0.0031	0.037	9
Ccdc126	0.0735	0.0031	0.037	9
Cfh	0.0431	0.0031	0.037	9
Chd9	0.1595	0.0031	0.037	9
Cops5	0.0608	0.0031	0.037	9
Ctr9	0.0061	0.0031	0.037	9
Dennd2a	-0.0033	0.0031	0.037	9
Dock3	0.3339	0.0031	0.037	9
Glb1	-0.0295	0.0031	0.037	9
Il34	-0.0679	0.0031	0.037	9
Inafm1	-0.0133	0.0031	0.037	9
Mgat4b	-0.0364	0.0031	0.037	9
Phtf2	-0.0364	0.0031	0.037	9
Pla2g6	-0.0508	0.0031	0.037	9
Psmg3	-0.0601	0.0031	0.037	9
Slc35f6	-0.0722	0.0031	0.037	9
Sox12	-0.0181	0.0031	0.037	9
Sstr2	0.3838	0.0031	0.037	9
Tbcc	-0.076	0.0031	0.037	9
Tnk2	0.3896	0.0031	0.037	9
Tomm34	0.2829	0.0031	0.037	9
Ttbk1	-0.0198	0.0031	0.037	9
Unkl	0.0949	0.0031	0.037	9
Wwtr1	0.0453	0.0031	0.037	9
2700081O15Rik	-0.0486	0.0032	0.037	9
Acsbg1	-0.0056	0.0032	0.037	9
Ano3	0.6197	0.0032	0.037	9
Bhlhe41	0.1507	0.0032	0.037	9
Bicd2	-0.041	0.0032	0.037	9
Csf1r	-0.0003	0.0032	0.037	9
Drg1	0.0184	0.0032	0.037	9
Eml1	-0.0146	0.0032	0.037	9
Gpsm1	-0.0683	0.0032	0.037	9
Mib1	0.5145	0.0032	0.037	9
Mnt	-0.0476	0.0032	0.037	9
Ovol2	-0.0172	0.0032	0.037	9
Rusc2	0.2065	0.0032	0.037	9
Sdc4	0.081	0.0032	0.037	9
Sec23ip	0.1355	0.0032	0.037	9
Slc2a1	0.2202	0.0032	0.037	9
Slc39a12	0.1657	0.0032	0.037	9
Snx5	0.2197	0.0032	0.037	9
Sorbs2	0.273	0.0032	0.037	9
Zfyve27	-0.0658	0.0032	0.037	9
AI837181	-0.0031	0.0033	0.037	9
Acox1	0.0828	0.0033	0.037	9
Armc9	-0.0421	0.0033	0.037	9
Ciapin1	-0.0384	0.0033	0.037	9
Ctsl	0.3139	0.0033	0.037	9
Gad1	0.3638	0.0033	0.037	9
Gpr85	0.1436	0.0033	0.037	9
Hsd17b12	0.1616	0.0033	0.037	9
Ilk	0.0032	0.0033	0.037	9
Kcnc2	0.2533	0.0033	0.037	9
Kcnd2	0.2855	0.0033	0.037	9
Kdm6b	-0.0753	0.0033	0.037	9
Nap1l4	0.2427	0.0033	0.037	9
Nop16	-0.0409	0.0033	0.037	9
Nsmce1	-0.0292	0.0033	0.037	9
Plxnb2	-0.086	0.0033	0.037	9
Prr3	-0.0466	0.0033	0.037	9
Rab4b	-0.0211	0.0033	0.037	9
Skiv2l	-0.1359	0.0033	0.037	9
Slc16a11	-0.022	0.0033	0.037	9
Smarcb1	-0.1297	0.0033	0.037	9
St7l	0.0917	0.0033	0.037	9
Stx5a	-0.2216	0.0033	0.037	9
Tcf7l2	0.0631	0.0033	0.037	9
Ube2h	0.2571	0.0033	0.037	9
Usp22	0.3577	0.0033	0.037	9
Xxylt1	0.0972	0.0033	0.037	9
Zfp946	0.0518	0.0033	0.037	9
Adamts10	-0.0696	0.0034	0.038	9
Fam120a	0.3181	0.0034	0.037	9
Fsd1l	0.1369	0.0034	0.038	9
Mcm4	-0.0346	0.0034	0.038	9
Mta1	0.0349	0.0034	0.038	9
Nptx2	0.1715	0.0034	0.038	9
Ppp1r14b	-0.055	0.0034	0.038	9
Ppp3cc	0.1498	0.0034	0.037	9
Ptges3	0.5117	0.0034	0.038	9
Raf1	0.1667	0.0034	0.038	9
Tbrg4	-0.032	0.0034	0.037	9
Tmem168	0.0612	0.0034	0.038	9
Tubgcp2	-0.0908	0.0034	0.038	9
Alad	-0.0346	0.0035	0.038	9
Arrdc3	0.3027	0.0035	0.038	9
Cops3	0.264	0.0035	0.038	9
Cyb5r3	-0.0582	0.0035	0.038	9
Gnal	0.1407	0.0035	0.038	9
Hmgb3	0.1585	0.0035	0.038	9
Kmt5b	0.1482	0.0035	0.038	9
Lmtk2	0.6961	0.0035	0.038	9
Mgp	-0.0223	0.0035	0.038	9
Mrpl51	-0.0991	0.0035	0.038	9
Msra	0.0041	0.0035	0.038	9
Oard1	-0.06	0.0035	0.038	9
Pnp	-0.0097	0.0035	0.038	9
Ppih	-0.0366	0.0035	0.038	9
Ppp1r12a	0.3578	0.0035	0.038	9
Prmt5	-0.1361	0.0035	0.038	9
Rgs20	0.2034	0.0035	0.038	9
Sall2	-0.0019	0.0035	0.038	9
Uvrag	0.0937	0.0035	0.038	9
Abhd17b	0.2089	0.0036	0.038	9
Arid5b	0.0967	0.0036	0.038	9
Atg4c	0.0496	0.0036	0.038	9
Brat1	0.0592	0.0036	0.038	9
Ccdc22	-0.1104	0.0036	0.038	9
Cnot1	0.0501	0.0036	0.038	9
Cry2	0.0329	0.0036	0.038	9
Dennd1a	-0.018	0.0036	0.038	9
Eefsec	-0.078	0.0036	0.038	9
Fam169a	0.2534	0.0036	0.038	9
Fkbp1b	-0.0412	0.0036	0.038	9
Gphn	0.2457	0.0036	0.038	9
Hsdl1	-0.0114	0.0036	0.038	9
Hyou1	0.4515	0.0036	0.038	9
Kcnip2	-0.0864	0.0036	0.038	9
Kdm4b	-0.0854	0.0036	0.038	9
Kptn	-0.0211	0.0036	0.038	9
Lrrc57	0.1326	0.0036	0.038	9
Mafg	-0.1075	0.0036	0.038	9
Map4k3	0.3079	0.0036	0.038	9
Mfsd13a	-0.0474	0.0036	0.038	9
Mpc1	0.3118	0.0036	0.038	9
Mtfp1	-0.0289	0.0036	0.038	9
Myo1b	0.1158	0.0036	0.038	9
Neurod2	0.2539	0.0036	0.038	9
Nova1	0.2525	0.0036	0.038	9
Pdlim7	-0.0884	0.0036	0.038	9
Pdp2	0.0316	0.0036	0.038	9
Pik3ip1	-0.0017	0.0036	0.038	9
Prkd3	0.0627	0.0036	0.038	9
Rad1	-0.0123	0.0036	0.038	9
Rad23b	0.3707	0.0036	0.038	9
Rdh11	0.0922	0.0036	0.038	9
Rhpn1	-0.0221	0.0036	0.038	9
Scg2	0.6975	0.0036	0.038	9
Tm2d3	-0.0819	0.0036	0.038	9
Adgrg1	0.0346	0.0037	0.038	9
Aftph	0.2218	0.0037	0.038	9
Ap3b1	-0.0645	0.0037	0.038	9
Arhgap15	0.1307	0.0037	0.038	9
As3mt	0.0624	0.0037	0.038	9
BC017158	-0.0299	0.0037	0.038	9
BC037034	-0.1067	0.0037	0.038	9
Chchd7	-0.0239	0.0037	0.038	9
Dcaf11	-0.2177	0.0037	0.038	9
Dip2a	0.1603	0.0037	0.038	9
Fabp7	0.1022	0.0037	0.038	9
Hdac7	-0.0398	0.0037	0.038	9
Hspa4l	0.501	0.0037	0.038	9
Ift172	-0.1266	0.0037	0.038	9
Kcnip3	-0.1204	0.0037	0.038	9
Mfn1	-0.0383	0.0037	0.038	9
Nme5	-0.0369	0.0037	0.038	9
Prkag2	0.0973	0.0037	0.038	9
Rxfp1	-0.0484	0.0037	0.038	9
Smarcc1	0.1509	0.0037	0.038	9
Spcs3	0.3324	0.0037	0.038	9
Strap	0.4015	0.0037	0.038	9
Zfp101	-0.0119	0.0037	0.038	9
Zfp580	0.0175	0.0037	0.038	9
Zfp668	-0.033	0.0037	0.038	9
2310022B05Rik	-0.0226	0.0038	0.038	9
Aldh1l1	-0.043	0.0038	0.038	9
Atg9a	0.0245	0.0038	0.038	9
Atp6v0a2	-0.0195	0.0038	0.038	9
Babam1	-0.0299	0.0038	0.038	9
Bcor	-0.037	0.0038	0.038	9
Cd200	0.3409	0.0038	0.038	9
Cep83	0.1213	0.0038	0.038	9
Cetn2	0.1953	0.0038	0.038	9
Crtc3	-0.0149	0.0038	0.038	9
Dcaf15	-0.0697	0.0038	0.038	9
Fam104a	-0.0295	0.0038	0.038	9
Gramd1b	0.2471	0.0038	0.038	9
Hip1	-0.0091	0.0038	0.038	9
Lrp11	0.6067	0.0038	0.038	9
Ly86	0.0521	0.0038	0.038	9
Matn4	-0.0228	0.0038	0.038	9
Myh9	0.1762	0.0038	0.038	9
Nckipsd	-0.1188	0.0038	0.038	9
Ostm1	0.0245	0.0038	0.038	9
Pim2	-0.056	0.0038	0.038	9
Rhov	-0.0672	0.0038	0.038	9
Sap130	-0.0021	0.0038	0.038	9
Slc7a10	-0.1181	0.0038	0.038	9
Tmem208	-0.0898	0.0038	0.038	9
Ube2d1	0.1731	0.0038	0.038	9
1700021F05Rik	-0.002	0.0039	0.038	9
B4galt4	-0.0184	0.0039	0.038	9
Clip4	0.0045	0.0039	0.038	9
Dbnl	-0.0448	0.0039	0.038	9
Dpp3	-0.0593	0.0039	0.038	9
Ermn	0.1645	0.0039	0.038	9
Hs2st1	0.2212	0.0039	0.038	9
Ift140	-0.0233	0.0039	0.038	9
Kcnj2	0.0468	0.0039	0.038	9
Medag	0.0624	0.0039	0.038	9
Mrpl23	-0.0689	0.0039	0.038	9
Naxe	-0.084	0.0039	0.038	9
Nip7	0.0733	0.0039	0.038	9
Ranbp2	0.0087	0.0039	0.038	9
Sdhc	0.4734	0.0039	0.038	9
Skiv2l2	-0.0042	0.0039	0.038	9
Ube2w	0.2655	0.0039	0.038	9
Vps26a	0.1946	0.0039	0.038	9
Xylt2	-0.0507	0.0039	0.038	9
Zfp282	-0.0429	0.0039	0.038	9
AI593442	0.6173	0.004	0.038	9
Abhd14a	-0.0431	0.004	0.038	9
Aptx	-0.0043	0.004	0.038	9
Arhgap5	0.3241	0.004	0.038	9
Atp11c	0.0048	0.004	0.038	9
Clic1	-0.0471	0.004	0.038	9
Ctdspl	-0.0223	0.004	0.038	9
Dcaf5	0.1573	0.004	0.038	9
Fam241b	0.1974	0.004	0.038	9
Fgfr1	-0.0093	0.004	0.038	9
Ggct	-0.1112	0.004	0.038	9
Gpcpd1	0.1953	0.004	0.038	9
Gtf3c2	0.0367	0.004	0.038	9
Gtpbp1	-0.0009	0.004	0.038	9
Hexim2	-0.0252	0.004	0.038	9
Kcnab3	-0.0366	0.004	0.038	9
Kcnd1	-0.0187	0.004	0.038	9
Lnx1	0.0863	0.004	0.038	9
Ly6c1	0.0095	0.004	0.038	9
Malsu1	-0.0468	0.004	0.038	9
Mto1	-0.0629	0.004	0.038	9
Nr1d2	0.237	0.004	0.038	9
Orc5	0.0477	0.004	0.038	9
R3hdm2	0.1331	0.004	0.038	9
Sacm1l	0.2239	0.004	0.038	9
Sar1b	0.2721	0.004	0.038	9
Slc50a1	-0.1354	0.004	0.038	9
Slc6a1	0.3647	0.004	0.038	9
Taf8	-0.0167	0.004	0.038	9
Uba2	0.2364	0.004	0.038	9
Wbp1	-0.1052	0.004	0.038	9
Wdr33	0.0051	0.004	0.038	9
Zfp365	0.3972	0.004	0.038	9
Arvcf	-0.0314	0.0041	0.038	9
Cox20	-0.0818	0.0041	0.038	9
Herc3	0.4954	0.0041	0.038	9
Incenp	-0.0361	0.0041	0.038	9
Ints9	-0.0147	0.0041	0.038	9
Med29	-0.1175	0.0041	0.038	9
Mindy4	-0.0087	0.0041	0.038	9
Mtfr1l	0.0278	0.0041	0.038	9
Mvd	-0.0603	0.0041	0.038	9
Ndor1	-0.0464	0.0041	0.038	9
Ostc	0.1909	0.0041	0.038	9
Phtf1	0.099	0.0041	0.038	9
Pkn1	-0.07	0.0041	0.038	9
Polg	-0.069	0.0041	0.038	9
Rae1	-0.0921	0.0041	0.038	9
Rgs8	0.0327	0.0041	0.038	9
Rhobtb2	0.0205	0.0041	0.038	9
Sirt7	-0.1694	0.0041	0.038	9
Stoml1	-0.2296	0.0041	0.038	9
Sypl	0.1583	0.0041	0.038	9
Tedc2	-0.0177	0.0041	0.038	9
Tex10	0.0874	0.0041	0.038	9
Tnip2	-0.0274	0.0041	0.038	9
Trappc6a	-0.0907	0.0041	0.038	9
Zbtb33	0.1029	0.0041	0.038	9
Zbtb38	0.2107	0.0041	0.038	9
2410131K14Rik	-0.0281	0.0042	0.038	9
4930452B06Rik	-0.027	0.0042	0.038	9
Apopt1	0.1149	0.0042	0.038	9
Camk2n2	0.2922	0.0042	0.038	9
Cdc42ep2	-0.0447	0.0042	0.038	9
Cep350	0.0726	0.0042	0.038	9
Ctnnbl1	-0.0143	0.0042	0.038	9
Dis3l2	-0.0825	0.0042	0.038	9
Elac1	-0.0234	0.0042	0.038	9
Ercc4	-0.0199	0.0042	0.038	9
Fndc5	0.1703	0.0042	0.038	9
Gcnt4	0.0534	0.0042	0.038	9
Izumo4	-0.2058	0.0042	0.038	9
Map3k7	0.1223	0.0042	0.038	9
Mpv17l	0.2568	0.0042	0.038	9
Nol9	0.0632	0.0042	0.038	9
Pgpep1	-0.0276	0.0042	0.038	9
Psmb2	-0.1322	0.0042	0.038	9
Rela	-0.055	0.0042	0.038	9
Rnf169	-0.0346	0.0042	0.038	9
Slc15a4	0.0046	0.0042	0.038	9
Slc38a7	-0.0799	0.0042	0.038	9
Tmem44	-0.0446	0.0042	0.038	9
Trim41	0.0152	0.0042	0.038	9
Ufd1	0.0172	0.0042	0.038	9
Usp6nl	0.0606	0.0042	0.038	9
Zfp560	-0.0094	0.0042	0.038	9
Adrm1	-0.204	0.0043	0.038	9
Ankrd13a	-0.0797	0.0043	0.038	9
Arfgef2	0.1694	0.0043	0.038	9
Ascc1	-0.0578	0.0043	0.038	9
Ccdc167	-0.0926	0.0043	0.038	9
Cpeb1	-0.0993	0.0043	0.038	9
Daam2	-0.0295	0.0043	0.038	9
Dcps	-0.0111	0.0043	0.038	9
Ehd3	0.2925	0.0043	0.038	9
Fbxl17	0.1854	0.0043	0.038	9
Galk1	-0.0162	0.0043	0.038	9
Gtf2b	-0.0068	0.0043	0.038	9
Hdac3	0.1918	0.0043	0.038	9
Hipk2	0.1415	0.0043	0.038	9
Ifnar1	0.1462	0.0043	0.038	9
Itga1	0.043	0.0043	0.038	9
Med9	-0.0524	0.0043	0.038	9
Nck2	0.1453	0.0043	0.038	9
Pcdh9	0.4776	0.0043	0.038	9
Pglyrp1	-0.0687	0.0043	0.038	9
Raph1	0.3766	0.0043	0.038	9
Rbpj	-0.0164	0.0043	0.038	9
Rin1	-0.0808	0.0043	0.038	9
Slc30a4	0.2419	0.0043	0.038	9
Tars2	-0.1106	0.0043	0.038	9
Tsen2	-0.0642	0.0043	0.038	9
Vps36	0.1098	0.0043	0.038	9
Abhd14b	-0.0079	0.0044	0.038	9
BC003965	-0.0494	0.0044	0.038	9
Cabin1	-0.1203	0.0044	0.038	9
Cobl	0.24	0.0044	0.038	9
Cttnbp2nl	0.0678	0.0044	0.038	9
Erbin	0.2214	0.0044	0.038	9
Fam214b	0.1227	0.0044	0.038	9
Hmgn2	-0.039	0.0044	0.038	9
Hr	0.1016	0.0044	0.038	9
Kcnc4	-0.0263	0.0044	0.038	9
Map2k5	-0.0314	0.0044	0.038	9
Mrpl24	-0.073	0.0044	0.038	9
Nefm	0.2969	0.0044	0.038	9
Nyap2	0.1969	0.0044	0.038	9
Oplah	-0.0572	0.0044	0.038	9
Paip1	0.4168	0.0044	0.038	9
Ptprt	0.2098	0.0044	0.038	9
Rbm33	-0.0134	0.0044	0.038	9
Sfi1	-0.1396	0.0044	0.038	9
Sptlc1	-0.0794	0.0044	0.038	9
2610021A01Rik	0.0768	0.0045	0.038	9
Ankrd40	0.2727	0.0045	0.038	9
Arf4	0.4791	0.0045	0.038	9
Brd9	-0.1126	0.0045	0.038	9
Cask	0.1869	0.0045	0.038	9
Cggbp1	0.2331	0.0045	0.038	9
Clic4	0.1185	0.0045	0.038	9
Desi1	-0.1142	0.0045	0.038	9
Farsa	-0.0749	0.0045	0.038	9
Gdap1l1	-0.1177	0.0045	0.038	9
Gemin7	-0.1021	0.0045	0.038	9
Kctd6	0.1149	0.0045	0.038	9
Kif3b	0.2143	0.0045	0.038	9
Mettl23	-0.0247	0.0045	0.038	9
Mien1	0.0059	0.0045	0.038	9
Ncoa7	0.2312	0.0045	0.038	9
Pop7	-0.1096	0.0045	0.038	9
Prpsap1	-0.1067	0.0045	0.038	9
Rab34	-0.0159	0.0045	0.038	9
Slitrk3	0.1335	0.0045	0.038	9
Ssr1	0.4317	0.0045	0.038	9
Tgfbrap1	0.12	0.0045	0.038	9
Tmem123	0.0539	0.0045	0.038	9
Tmem243	0.0559	0.0045	0.038	9
Tnfaip8l1	-0.0071	0.0045	0.038	9
Ube2g1	0.3039	0.0045	0.038	9
Uimc1	0.056	0.0045	0.038	9
Vrk1	-0.0135	0.0045	0.038	9
Zdhhc17	0.2828	0.0045	0.038	9
Arhgef9	0.3685	0.0046	0.038	9
Aspscr1	-0.0514	0.0046	0.038	9
B4galt3	-0.0745	0.0046	0.038	9
Cckbr	-0.0727	0.0046	0.038	9
Ccnt2	0.0646	0.0046	0.038	9
Chchd4	0.1576	0.0046	0.038	9
Ddb2	-0.0045	0.0046	0.038	9
Eef1akmt1	-0.0362	0.0046	0.038	9
Gfra2	-0.0004	0.0046	0.038	9
Gprc5b	0.1906	0.0046	0.038	9
Hmbs	-0.0281	0.0046	0.038	9
Lactb2	0.0482	0.0046	0.038	9
Lpar1	0.0889	0.0046	0.038	9
Lrrc8a	0.091	0.0046	0.038	9
Neto1	0.1625	0.0046	0.038	9
Nxph3	-0.0182	0.0046	0.038	9
Orc2	0.0985	0.0046	0.038	9
Paqr8	0.1641	0.0046	0.038	9
Plod3	0.0178	0.0046	0.038	9
Rad52	-0.0348	0.0046	0.038	9
Rspo2	0.0766	0.0046	0.038	9
Scyl1	-0.0313	0.0046	0.038	9
Sorcs1	0.1221	0.0046	0.038	9
Tnrc6b	0.3021	0.0046	0.038	9
Trnp1	0.1582	0.0046	0.038	9
Ubap2	-0.0419	0.0046	0.038	9
Vcpip1	0.3989	0.0046	0.038	9
Zscan18	-0.01	0.0046	0.038	9
Ankrd13d	-0.1086	0.0047	0.038	9
B4galt2	-0.1088	0.0047	0.038	9
Bud23	-0.0762	0.0047	0.038	9
Dusp26	-0.0418	0.0047	0.038	9
Epha7	0.2053	0.0047	0.038	9
Ermard	-0.0012	0.0047	0.038	9
Fads1	0.039	0.0047	0.038	9
Flot1	-0.1228	0.0047	0.038	9
Foxk1	0.1002	0.0047	0.038	9
Mcee	-0.0664	0.0047	0.038	9
Med24	-0.1995	0.0047	0.038	9
Mrps18c	-0.0338	0.0047	0.038	9
Net1	0.148	0.0047	0.038	9
Pla2g4e	-0.045	0.0047	0.038	9
Prmt8	0.2282	0.0047	0.038	9
Sacs	0.1478	0.0047	0.038	9
Scn1a	0.4114	0.0047	0.038	9
Ssrp1	-0.1062	0.0047	0.038	9
Tnfaip6	0.0851	0.0047	0.038	9
Ubac1	0.1122	0.0047	0.038	9
Zfyve1	0.1124	0.0047	0.038	9
Zic1	0.0478	0.0047	0.038	9
Aldh6a1	0.1311	0.0048	0.038	9
Aqp4	0.0918	0.0048	0.038	9
Borcs8	-0.1539	0.0048	0.038	9
C1qa	-0.0262	0.0048	0.038	9
Cep44	0.024	0.0048	0.038	9
Cnep1r1	0.1934	0.0048	0.038	9
Comt	0.4403	0.0048	0.038	9
Dazap2	0.3201	0.0048	0.038	9
Dph6	0.0291	0.0048	0.038	9
Gucd1	-0.0106	0.0048	0.038	9
Hnrnpl	0.4317	0.0048	0.038	9
Ist1	-0.0151	0.0048	0.038	9
Khsrp	0.2929	0.0048	0.038	9
Lmf1	-0.0425	0.0048	0.038	9
Manea	0.1591	0.0048	0.038	9
Mettl7a1	0.1096	0.0048	0.038	9
Ncln	-0.2832	0.0048	0.038	9
Nmb	0.1333	0.0048	0.038	9
Pabpc4	0.0907	0.0048	0.038	9
Pcnx2	0.0581	0.0048	0.038	9
Rad23a	0.0162	0.0048	0.038	9
Rnf157	0.3179	0.0048	0.038	9
Rtraf	-0.0077	0.0048	0.038	9
Sbsn	-0.0229	0.0048	0.038	9
Sipa1l1	0.6043	0.0048	0.038	9
Slc35c2	-0.0315	0.0048	0.038	9
Sugp1	-0.0729	0.0048	0.038	9
Supt3	-0.0209	0.0048	0.038	9
Tcp11l2	0.1012	0.0048	0.038	9
Tmem184c	0.2752	0.0048	0.038	9
Trp53	0.0681	0.0048	0.038	9
Unc45a	-0.0667	0.0048	0.038	9
Uvssa	0.035	0.0048	0.038	9
Zbtb48	-0.0635	0.0048	0.038	9
Zfp113	0.0422	0.0048	0.038	9
Zfp358	-0.0152	0.0048	0.038	9
1500009C09Rik	-0.0535	0.0049	0.038	9
Actr1a	-0.0581	0.0049	0.038	9
Atp11b	0.2032	0.0049	0.038	9
Ccdc181	-0.044	0.0049	0.038	9
Cd302	0.097	0.0049	0.038	9
Dpp10	0.3923	0.0049	0.038	9
Dus3l	-0.1315	0.0049	0.038	9
Ebag9	0.1059	0.0049	0.038	9
Fdps	-0.0404	0.0049	0.038	9
Fgfr1op	-0.076	0.0049	0.038	9
Ndfip2	0.613	0.0049	0.038	9
Nus1	0.3699	0.0049	0.038	9
Nvl	0.0144	0.0049	0.038	9
Phf1	-0.07	0.0049	0.038	9
Pigk	-0.0134	0.0049	0.038	9
Pitrm1	-0.034	0.0049	0.038	9
Raly	-0.0383	0.0049	0.038	9
S1pr5	0.0575	0.0049	0.038	9
Ssr4	-0.0298	0.0049	0.038	9
Vwa5b2	-0.0927	0.0049	0.038	9
Zfp444	-0.0553	0.0049	0.038	9
Zfp653	-0.0008	0.0049	0.038	9
Akap17b	-0.0152	0.005	0.038	9
Bloc1s6	0.0682	0.005	0.038	9
Camk2g	0.2793	0.005	0.038	9
Chga	0.3303	0.005	0.038	9
Col11a2	-0.0338	0.005	0.038	9
Col6a2	-0.0802	0.005	0.038	9
Comtd1	-0.1007	0.005	0.038	9
Ddi2	0.1789	0.005	0.038	9
Fam107a	0.3243	0.005	0.038	9
Fam135b	0.2037	0.005	0.038	9
Fbrs	-0.0187	0.005	0.038	9
Fbxo8	0.0653	0.005	0.038	9
Fpgt	0.0811	0.005	0.038	9
Fxyd5	-0.1476	0.005	0.038	9
Ggh	0.0599	0.005	0.038	9
Gm16286	0.0597	0.005	0.038	9
Hebp1	-0.0292	0.005	0.038	9
Lpcat4	0.5066	0.005	0.038	9
Lta4h	-0.0016	0.005	0.038	9
Mkln1	0.3746	0.005	0.038	9
Pou3f3	0.4	0.005	0.038	9
Psma3	0.3525	0.005	0.038	9
Pstk	0.0217	0.005	0.038	9
Rab6b	0.1302	0.005	0.038	9
Sap18	-0.0126	0.005	0.038	9
Sntb2	0.1623	0.005	0.038	9
Sos2	0.1069	0.005	0.038	9
Ttpal	-0.0752	0.005	0.038	9
Ttyh2	0.1176	0.005	0.038	9
Wdr82	0.3209	0.005	0.038	9
Zfp472	0.0234	0.005	0.038	9
Clk2	-0.0525	0.0051	0.038	9
Dand5	-0.0634	0.0051	0.038	9
Entpd6	-0.0793	0.0051	0.038	9
Hecw2	0.2317	0.0051	0.038	9
Inpp4a	0.3463	0.0051	0.038	9
Lig3	-0.0126	0.0051	0.038	9
Lrp10	-0.0173	0.0051	0.038	9
Map3k11	-0.0393	0.0051	0.038	9
Mgat2	0.1138	0.0051	0.038	9
Mrps23	-0.0566	0.0051	0.038	9
Mut	0.132	0.0051	0.038	9
Nbr1	0.0565	0.0051	0.038	9
Oser1	-0.0107	0.0051	0.038	9
Pold3	-0.0712	0.0051	0.038	9
Qrich1	0.2141	0.0051	0.038	9
Rnf19a	-0.0123	0.0051	0.038	9
Rnpepl1	-0.065	0.0051	0.038	9
Sema6c	-0.0611	0.0051	0.038	9
Slc35e2	0.183	0.0051	0.038	9
Tmem29	-0.0438	0.0051	0.038	9
Wdr81	-0.0839	0.0051	0.038	9
Zfp367	0.1219	0.0051	0.038	9
A730017C20Rik	-0.0612	0.0052	0.039	9
Alg10b	0.1681	0.0052	0.039	9
Arid3b	-0.0407	0.0052	0.039	9
Astn2	0.0721	0.0052	0.039	9
Col5a1	-0.1022	0.0052	0.039	9
Cox19	-0.1388	0.0052	0.039	9
Ctps	0.0187	0.0052	0.039	9
Ddx39	-0.0235	0.0052	0.039	9
Dgat2	-0.0049	0.0052	0.039	9
Dirc2	0.2146	0.0052	0.039	9
Elp5	-0.0499	0.0052	0.039	9
Etfa	0.152	0.0052	0.039	9
Itgb8	0.1469	0.0052	0.039	9
Man2c1	-0.1798	0.0052	0.038	9
Mthfs	0.0382	0.0052	0.039	9
Oscp1	-0.0274	0.0052	0.039	9
Prss23	0.1339	0.0052	0.039	9
Sdf2	0.1985	0.0052	0.039	9
Slc25a44	0.1961	0.0052	0.039	9
Spef1	-0.0201	0.0052	0.039	9
Spg20	0.1025	0.0052	0.039	9
Sri	0.197	0.0052	0.039	9
Tbce	-0.0244	0.0052	0.039	9
Uhmk1	0.3596	0.0052	0.039	9
Xiap	0.4371	0.0052	0.039	9
1700001L19Rik	-0.016	0.0053	0.039	9
Angptl6	-0.0646	0.0053	0.039	9
Fdx1	0.0898	0.0053	0.039	9
Gmpr2	-0.096	0.0053	0.039	9
Gopc	0.2735	0.0053	0.039	9
Gstp1	-0.1083	0.0053	0.039	9
Htr1a	0.0424	0.0053	0.039	9
Mxi1	0.0251	0.0053	0.039	9
Ndufa1	0.533	0.0053	0.039	9
Pdcl	0.1151	0.0053	0.039	9
Rabepk	0.0051	0.0053	0.039	9
Rbbp7	0.3786	0.0053	0.039	9
Surf1	0.0134	0.0053	0.039	9
Zmym3	-0.0155	0.0053	0.039	9
Acp1	0.2329	0.0054	0.039	9
Cmas	0.2425	0.0054	0.039	9
Coa6	0.0996	0.0054	0.039	9
Commd10	0.074	0.0054	0.039	9
Cyp4f13	-0.0324	0.0054	0.039	9
Etnppl	0.0661	0.0054	0.039	9
Gjb1	-0.0128	0.0054	0.039	9
Guf1	-0.0192	0.0054	0.039	9
Itgb3bp	-0.0154	0.0054	0.039	9
Lsm8	0.1582	0.0054	0.039	9
Nhlrc1	0.0902	0.0054	0.039	9
Prmt9	-0.0501	0.0054	0.039	9
Setd7	0.3499	0.0054	0.039	9
Slc6a8	0.0006	0.0054	0.039	9
Traf2	-0.0601	0.0054	0.039	9
Tusc3	0.3576	0.0054	0.039	9
Vkorc1	-0.0612	0.0054	0.039	9
Vwa5a	0.0403	0.0054	0.039	9
1110065P20Rik	0.0484	0.0055	0.039	9
Ahi1	-0.0052	0.0055	0.039	9
Bok	0.0322	0.0055	0.039	9
Chmp4b	0.8037	0.0055	0.039	9
Ctps2	-0.1249	0.0055	0.039	9
Grpel1	0.0536	0.0055	0.039	9
Gtf2f1	-0.1628	0.0055	0.039	9
Htr5a	0.0364	0.0055	0.039	9
Itgb5	-0.033	0.0055	0.039	9
Prmt2	-0.0289	0.0055	0.039	9
Ptpn4	0.2435	0.0055	0.039	9
Rab10	0.4584	0.0055	0.039	9
Rab12	0.2733	0.0055	0.039	9
Rbm12	-0.0299	0.0055	0.039	9
Rnf26	-0.0226	0.0055	0.039	9
Senp5	0.1101	0.0055	0.039	9
Slc39a13	-0.0293	0.0055	0.039	9
Slc4a7	-0.0321	0.0055	0.039	9
Zfp524	-0.0483	0.0055	0.039	9
1700003E16Rik	-0.0263	0.0056	0.039	9
1810041L15Rik	0.0054	0.0056	0.039	9
Bax	-0.2403	0.0056	0.039	9
Bckdhb	-0.0225	0.0056	0.039	9
Camkv	-0.1081	0.0056	0.039	9
Cbfa2t2	0.194	0.0056	0.039	9
Cplx3	-0.0381	0.0056	0.039	9
Dazap1	-0.1827	0.0056	0.039	9
Dennd6b	-0.2118	0.0056	0.039	9
Dusp28	-0.0696	0.0056	0.039	9
Dynll1	-0.259	0.0056	0.039	9
Eml3	-0.0259	0.0056	0.039	9
Exosc10	-0.071	0.0056	0.039	9
Iqce	-0.0873	0.0056	0.039	9
Larp4	0.1458	0.0056	0.039	9
Lbh	-0.0009	0.0056	0.039	9
Nat9	-0.0812	0.0056	0.039	9
Ncapd3	0.0695	0.0056	0.039	9
Nt5m	-0.0061	0.0056	0.039	9
Nudt16l1	-0.0634	0.0056	0.039	9
Opcml	0.6876	0.0056	0.039	9
Plekha2	0.0827	0.0056	0.039	9
Poldip2	0.0078	0.0056	0.039	9
Polr3h	-0.0948	0.0056	0.039	9
Ppox	-0.069	0.0056	0.039	9
Pygb	-0.0445	0.0056	0.039	9
Rai2	0.0462	0.0056	0.039	9
Supt16	0.2867	0.0056	0.039	9
Supt20	-0.0595	0.0056	0.039	9
Tbcel	0.1248	0.0056	0.039	9
Tmem62	-0.0105	0.0056	0.039	9
Traf3	-0.0202	0.0056	0.039	9
Unc5d	0.0934	0.0056	0.039	9
1500011K16Rik	0.0222	0.0057	0.039	9
Baiap2l1	-0.061	0.0057	0.039	9
Cacng4	0.1228	0.0057	0.039	9
Crebrf	0.1356	0.0057	0.039	9
E2f3	0.095	0.0057	0.039	9
Edc4	-0.0167	0.0057	0.039	9
Epha10	-0.0854	0.0057	0.039	9
Fam19a5	0.1973	0.0057	0.039	9
Fndc4	-0.0796	0.0057	0.039	9
Ikzf5	0.1289	0.0057	0.039	9
Jmjd1c	0.1678	0.0057	0.039	9
Leng8	-0.0602	0.0057	0.039	9
Lrrc17	0.3413	0.0057	0.039	9
Lrrc75a	-0.0649	0.0057	0.039	9
Pcdh7	0.4709	0.0057	0.039	9
Pdk2	-0.056	0.0057	0.039	9
Rab28	0.404	0.0057	0.039	9
Rasal1	-0.1628	0.0057	0.039	9
Rgs14	0.0973	0.0057	0.039	9
Sec11c	0.1264	0.0057	0.039	9
Slc48a1	0.0692	0.0057	0.039	9
Tln1	-0.0517	0.0057	0.039	9
1110038F14Rik	-0.0667	0.0058	0.039	9
Atad3a	-0.0192	0.0058	0.039	9
E130311K13Rik	0.0465	0.0058	0.039	9
Fbxl4	0.1344	0.0058	0.039	9
Gfm2	0.0004	0.0058	0.039	9
Gm2000	-0.0013	0.0058	0.039	9
Kpnb1	0.3728	0.0058	0.039	9
Ldlrad4	-0.075	0.0058	0.039	9
Lrrc1	-0.0276	0.0058	0.039	9
Mars	-0.1323	0.0058	0.039	9
Me1	0.1935	0.0058	0.039	9
Nell2	0.5075	0.0058	0.039	9
Nfasc	0.1793	0.0058	0.039	9
Pdrg1	-0.1116	0.0058	0.039	9
Phka2	-0.0397	0.0058	0.039	9
Ppp1r3c	-0.0184	0.0058	0.039	9
Ptges2	-0.0489	0.0058	0.039	9
Rab4a	-0.1094	0.0058	0.039	9
Rabgef1	0.1414	0.0058	0.039	9
Rara	0.0645	0.0058	0.039	9
S100pbp	0.0367	0.0058	0.039	9
Sybu	0.3908	0.0058	0.039	9
Ubl3	0.5469	0.0058	0.039	9
Usp45	0.1631	0.0058	0.039	9
Vps52	-0.044	0.0058	0.039	9
Zfp236	0.0989	0.0058	0.039	9
Zmym5	0.1376	0.0058	0.039	9
Arpc2	0.4429	0.0059	0.039	9
Asb3	-0.013	0.0059	0.039	9
Brinp1	0.3191	0.0059	0.039	9
Cmpk1	0.4272	0.0059	0.039	9
Ctdp1	-0.0194	0.0059	0.039	9
Dnajb12	0.2649	0.0059	0.039	9
Edem3	0.0922	0.0059	0.039	9
Ints10	-0.0451	0.0059	0.039	9
Kat2b	0.0642	0.0059	0.039	9
Mal2	0.5769	0.0059	0.039	9
Mrpl30	0.0048	0.0059	0.039	9
Nt5c3	0.2574	0.0059	0.039	9
Pnrc2	0.1478	0.0059	0.039	9
Prr13	0.0292	0.0059	0.039	9
Prrg3	-0.0171	0.0059	0.039	9
Psma5	0.4025	0.0059	0.039	9
Rilpl2	-0.0194	0.0059	0.039	9
Sestd1	0.1262	0.0059	0.039	9
Stx2	-0.0585	0.0059	0.039	9
Tomm5	-0.0046	0.0059	0.039	9
Trove2	0.2641	0.0059	0.039	9
Aars2	-0.0358	0.006	0.039	9
Abcb6	-0.0611	0.006	0.039	9
Anapc16	-0.0378	0.006	0.04	9
Arid1b	0.702	0.006	0.039	9
Atp13a3	0.2571	0.006	0.04	9
Cacul1	0.1049	0.006	0.04	9
Cds2	0.4663	0.006	0.039	9
Fam216a	0.2024	0.006	0.04	9
Hook2	-0.0081	0.006	0.039	9
Npas4	-0.2765	0.006	0.04	9
Rsf1	0.1336	0.006	0.04	9
Spin2c	0.0314	0.006	0.039	9
Srsf12	-0.0036	0.006	0.039	9
Stat5b	-0.017	0.006	0.04	9
Thsd7a	0.0297	0.006	0.04	9
Tmem106c	-0.0256	0.006	0.039	9
1700037C18Rik	-0.0389	0.0061	0.04	9
3110082I17Rik	0.057	0.0061	0.04	9
Arnt2	0.2669	0.0061	0.04	9
Bmpr2	0.3784	0.0061	0.04	9
C330007P06Rik	0.1268	0.0061	0.04	9
Cxxc1	-0.1358	0.0061	0.04	9
Eftud2	-0.1593	0.0061	0.04	9
Exosc7	-0.0628	0.0061	0.04	9
Fosb	-0.2484	0.0061	0.04	9
Gpx3	-0.0208	0.0061	0.04	9
Hmg20b	-0.0475	0.0061	0.04	9
Kmt2b	-0.1222	0.0061	0.04	9
Lrrc45	-0.177	0.0061	0.04	9
Mgme1	0.0356	0.0061	0.04	9
Nt5dc3	0.1902	0.0061	0.04	9
Papss1	0.2453	0.0061	0.04	9
Paqr9	0.1966	0.0061	0.04	9
Plxna3	-0.0591	0.0061	0.04	9
Snx32	-0.1422	0.0061	0.04	9
Wdr35	-0.0252	0.0061	0.04	9
Zmpste24	0.0876	0.0061	0.04	9
AU022252	-0.0192	0.0062	0.04	9
Ccdc85a	0.1649	0.0062	0.04	9
Coa7	-0.0178	0.0062	0.04	9
Fkbp15	-0.0179	0.0062	0.04	9
Gbf1	-0.0347	0.0062	0.04	9
Gcc2	0.2226	0.0062	0.04	9
Gcnt2	0.0822	0.0062	0.04	9
Gm12166	-0.0966	0.0062	0.04	9
Gm7879	0.0674	0.0062	0.04	9
Nploc4	0.0129	0.0062	0.04	9
Ost4	0.2685	0.0062	0.04	9
Prpsap2	0.127	0.0062	0.04	9
Rprd2	0.1361	0.0062	0.04	9
Susd4	0.2644	0.0062	0.04	9
Taf9b	0.0694	0.0062	0.04	9
Timm10b	0.0122	0.0062	0.04	9
Tmem120a	-0.0667	0.0062	0.04	9
Tmem70	0.1613	0.0062	0.04	9
Yipf4	0.3369	0.0062	0.04	9
Zfp81	0.075	0.0062	0.04	9
Arl5a	0.2355	0.0063	0.04	9
Brwd1	0.2484	0.0063	0.04	9
Clec2l	-0.1762	0.0063	0.04	9
Cox7c	0.2024	0.0063	0.04	9
Dab2ip	0.33	0.0063	0.04	9
Fbxw11	0.3497	0.0063	0.04	9
Fmr1	0.1957	0.0063	0.04	9
Gpaa1	-0.0517	0.0063	0.04	9
Hmces	-0.0834	0.0063	0.04	9
Jam3	0.012	0.0063	0.04	9
Notch1	0.0589	0.0063	0.04	9
Pigyl	-0.1957	0.0063	0.04	9
Ptprj	0.1252	0.0063	0.04	9
Sec14l5	0.0082	0.0063	0.04	9
Slc25a42	0.0905	0.0063	0.04	9
Tbc1d30	0.1411	0.0063	0.04	9
Tpcn1	0.0701	0.0063	0.04	9
Zfp39	0.0396	0.0063	0.04	9
Zkscan17	0.0013	0.0063	0.04	9
Ago3	-0.0106	0.0064	0.04	9
Ankrd39	-0.0269	0.0064	0.04	9
Apex1	0.1384	0.0064	0.04	9
Btaf1	-0.0138	0.0064	0.04	9
Chmp5	0.2867	0.0064	0.04	9
Elovl5	0.1942	0.0064	0.04	9
Erc2	0.3252	0.0064	0.04	9
Fam162a	-0.0221	0.0064	0.04	9
Frat1	0.0787	0.0064	0.04	9
Ibtk	0.0349	0.0064	0.04	9
Meis3	-0.132	0.0064	0.04	9
Ophn1	-0.0264	0.0064	0.04	9
Rasl10a	-0.0653	0.0064	0.04	9
Selenof	0.5817	0.0064	0.04	9
Smim15	0.2654	0.0064	0.04	9
Srgap3	0.2649	0.0064	0.04	9
Tfip11	-0.0349	0.0064	0.04	9
Tmbim1	0.0146	0.0064	0.04	9
Tsr3	-0.0678	0.0064	0.04	9
Ubqln1	0.4145	0.0064	0.04	9
2010111I01Rik	-0.0923	0.0065	0.04	9
Acsl1	0.0097	0.0065	0.04	9
Aff4	0.3286	0.0065	0.04	9
Atxn1l	0.0969	0.0065	0.04	9
Blnk	-0.0385	0.0065	0.04	9
Cenps	-0.0445	0.0065	0.04	9
Eif4g3	0.6726	0.0065	0.04	9
Etf1	0.1707	0.0065	0.04	9
Fam114a2	0.0831	0.0065	0.04	9
Farsb	-0.0406	0.0065	0.04	9
Gamt	-0.0321	0.0065	0.04	9
Map7d2	0.4706	0.0065	0.04	9
Me3	0.177	0.0065	0.04	9
Osbpl8	0.1828	0.0065	0.04	9
Rbm18	0.0321	0.0065	0.04	9
Resp18	-0.0291	0.0065	0.04	9
Shank2	0.2239	0.0065	0.04	9
Sorl1	0.5246	0.0065	0.04	9
Stk25	0.5577	0.0065	0.04	9
Tor3a	-0.0245	0.0065	0.04	9
Wipi1	-0.0188	0.0065	0.04	9
Zfp518a	0.056	0.0065	0.04	9
Anapc15	-0.0519	0.0066	0.04	9
Bin3	-0.0227	0.0066	0.04	9
Ddt	-0.1487	0.0066	0.04	9
Eng	-0.0479	0.0066	0.04	9
Gpatch2l	0.0342	0.0066	0.04	9
Lamp2	0.1749	0.0066	0.04	9
Letmd1	-0.0743	0.0066	0.041	9
Mbtps1	0.0458	0.0066	0.04	9
Mospd1	0.0006	0.0066	0.04	9
Naxd	-0.1347	0.0066	0.04	9
Nup50	0.0095	0.0066	0.04	9
Paqr4	-0.0065	0.0066	0.04	9
Paqr6	-0.0328	0.0066	0.04	9
Plpbp	0.324	0.0066	0.04	9
Polr1b	-0.0411	0.0066	0.04	9
Ppil4	0.016	0.0066	0.04	9
Ppp1r2	0.3524	0.0066	0.04	9
Rhoa	0.4933	0.0066	0.04	9
Siva1	-0.0768	0.0066	0.04	9
Syt3	-0.1351	0.0066	0.04	9
Usp31	0.2419	0.0066	0.04	9
Ackr1	0.1461	0.0067	0.041	9
Dnajc19	-0.0118	0.0067	0.041	9
Emc2	0.065	0.0067	0.041	9
Emc9	-0.1029	0.0067	0.041	9
Fbxw5	-0.1884	0.0067	0.041	9
Gfap	-0.0515	0.0067	0.041	9
Mettl27	-0.013	0.0067	0.041	9
Mpv17	0.174	0.0067	0.041	9
Slc22a8	0.0378	0.0067	0.041	9
Stk10	-0.0386	0.0067	0.041	9
Acaca	0.0044	0.0068	0.041	9
Akap8	-0.0688	0.0068	0.041	9
Akap9	0.1486	0.0068	0.041	9
Amn1	0.08	0.0068	0.041	9
Ankrd34a	0.0242	0.0068	0.041	9
Clcn3	0.5317	0.0068	0.041	9
Exoc2	0.1231	0.0068	0.041	9
F11r	0.0321	0.0068	0.041	9
Igfbp4	-0.0716	0.0068	0.041	9
Kpna1	0.2513	0.0068	0.041	9
Lgr4	0.0736	0.0068	0.041	9
Map1s	0.0414	0.0068	0.041	9
Msantd2	0.0156	0.0068	0.041	9
Naa60	0.0183	0.0068	0.041	9
Nat14	-0.0206	0.0068	0.041	9
Pcdhb17	0.0799	0.0068	0.041	9
Pdik1l	0.0574	0.0068	0.041	9
Slirp	0.254	0.0068	0.041	9
Tcerg1	0.1986	0.0068	0.041	9
Alkbh7	-0.0721	0.0069	0.041	9
Arel1	0.2182	0.0069	0.041	9
Arhgef1	-0.1431	0.0069	0.041	9
Atrnl1	0.035	0.0069	0.041	9
Cdc16	0.0074	0.0069	0.041	9
Chrna4	-0.0045	0.0069	0.041	9
Coq2	0.0725	0.0069	0.041	9
Dennd5b	0.3802	0.0069	0.041	9
Nr1d1	0.1929	0.0069	0.041	9
Otud6b	0.1605	0.0069	0.041	9
Otud7a	0.1309	0.0069	0.041	9
Polr2i	-0.1138	0.0069	0.041	9
Rpgr	-0.0441	0.0069	0.041	9
Setd6	-0.0113	0.0069	0.041	9
Smim10l1	0.317	0.0069	0.041	9
Tmc7	0.0478	0.0069	0.041	9
Wdr91	-0.0694	0.0069	0.041	9
Zyx	-0.0597	0.0069	0.041	9
1700037H04Rik	-0.0192	0.007	0.041	9
Dtd1	0.2062	0.007	0.041	9
Fam168b	0.0856	0.007	0.041	9
Fam189a2	-0.0719	0.007	0.041	9
Fuom	-0.1436	0.007	0.041	9
Gspt2	-0.0219	0.007	0.041	9
Hemk1	-0.0472	0.007	0.041	9
Iqgap1	-0.0171	0.007	0.041	9
Mrs2	0.0161	0.007	0.041	9
Pitpnm2	0.0049	0.007	0.041	9
Plp1	0.8877	0.007	0.041	9
Prr36	-0.0106	0.007	0.041	9
Rgmb	0.1822	0.007	0.041	9
Sec14l2	-0.0774	0.007	0.041	9
Secisbp2l	0.2982	0.007	0.041	9
Slc35a4	-0.033	0.007	0.041	9
Slitrk2	0.0822	0.007	0.041	9
Snapc5	0.0037	0.007	0.041	9
Specc1	0.1415	0.007	0.041	9
Srp54a	0.1583	0.007	0.041	9
Tbl3	-0.0355	0.007	0.041	9
Tmem167b	0.1378	0.007	0.041	9
Ubap2l	0.3559	0.007	0.041	9
Adarb1	0.2422	0.0071	0.041	9
Bap1	0.0186	0.0071	0.041	9
Gba2	-0.1307	0.0071	0.041	9
Lsm4	-0.0522	0.0071	0.041	9
Nudcd1	-0.0077	0.0071	0.041	9
Pick1	-0.1793	0.0071	0.041	9
Rnf121	-0.0424	0.0071	0.041	9
Sall1	0.0284	0.0071	0.041	9
Sf3b3	0.0504	0.0071	0.041	9
Spsb1	-0.0444	0.0071	0.041	9
Tmem55b	0.1082	0.0071	0.041	9
Wnk1	0.2921	0.0071	0.041	9
Zfp462	0.0615	0.0071	0.042	9
1700066M21Rik	0.0762	0.0072	0.042	9
2310035C23Rik	0.1683	0.0072	0.042	9
Brwd3	-0.0065	0.0072	0.042	9
Diras1	-0.0616	0.0072	0.042	9
Dlg5	-0.0098	0.0072	0.042	9
Edc3	-0.0074	0.0072	0.042	9
Edil3	0.3932	0.0072	0.042	9
Eif5a2	0.1162	0.0072	0.042	9
Epha4	0.4566	0.0072	0.042	9
Evi5l	-0.0595	0.0072	0.042	9
Ier2	-0.2678	0.0072	0.042	9
Mitd1	0.032	0.0072	0.042	9
Mlec	0.0198	0.0072	0.042	9
Pdgfb	-0.0755	0.0072	0.042	9
Tomm6	-0.042	0.0072	0.042	9
Trak2	0.2613	0.0072	0.042	9
Tsc22d4	0.2607	0.0072	0.042	9
Twnk	-0.0249	0.0072	0.042	9
Vps4b	0.1382	0.0072	0.042	9
Zfp991	0.0375	0.0072	0.042	9
Aldh9a1	-0.0208	0.0073	0.042	9
Arhgap33	-0.0453	0.0073	0.042	9
Atg5	0.1304	0.0073	0.042	9
Bicd1	0.2539	0.0073	0.042	9
Bysl	0.0182	0.0073	0.042	9
Chst2	0.4246	0.0073	0.042	9
Gm5113	-0.0224	0.0073	0.042	9
Inhba	0.0527	0.0073	0.042	9
Kdsr	0.1738	0.0073	0.042	9
Mcph1	-0.0125	0.0073	0.042	9
Mdm4	0.0107	0.0073	0.042	9
Nfrkb	0.004	0.0073	0.042	9
Nrip2	-0.0519	0.0073	0.042	9
Phf10	0.18	0.0073	0.042	9
Rab27b	0.0931	0.0073	0.042	9
Rasal2	0.1906	0.0073	0.042	9
Sap30bp	-0.0665	0.0073	0.042	9
Selenos	0.1781	0.0073	0.042	9
Slc36a1	0.4145	0.0073	0.042	9
Tfg	0.0174	0.0073	0.042	9
Uhrf1bp1	-0.0658	0.0073	0.042	9
Zfp445	0.3237	0.0073	0.042	9
Cacna2d1	0.3329	0.0074	0.042	9
Drg2	-0.0105	0.0074	0.042	9
Fance	-0.0392	0.0074	0.042	9
Fkrp	0.2098	0.0074	0.042	9
Gcdh	-0.015	0.0074	0.042	9
Gm11549	0.2581	0.0074	0.042	9
Gtf3c1	-0.1476	0.0074	0.042	9
Jtb	-0.0172	0.0074	0.042	9
Mthfd2	-0.0055	0.0074	0.042	9
Ppp1r16b	0.1966	0.0074	0.042	9
Rpp21	-0.0654	0.0074	0.042	9
Sec11a	-0.015	0.0074	0.042	9
Smap1	0.2586	0.0074	0.042	9
Sra1	-0.0524	0.0074	0.042	9
Ttc5	0.1328	0.0074	0.042	9
Vps4a	0.2639	0.0074	0.042	9
Zfp248	0.0424	0.0074	0.042	9
2010300C02Rik	0.0329	0.0075	0.042	9
Bcl2l2	0.3576	0.0075	0.042	9
Bcr	0.0183	0.0075	0.042	9
Brf2	-0.0248	0.0075	0.042	9
Celsr3	-0.0831	0.0075	0.042	9
Csnk1g3	0.4662	0.0075	0.042	9
Cul5	0.1543	0.0075	0.042	9
Dzip1l	0.0337	0.0075	0.042	9
Engase	-0.0194	0.0075	0.042	9
Fbxl20	0.1304	0.0075	0.042	9
Gal3st3	0.0906	0.0075	0.042	9
Laptm4b	0.1918	0.0075	0.042	9
Mbd6	-0.0305	0.0075	0.042	9
Ptbp3	0.0798	0.0075	0.042	9
Rbfox3	0.2968	0.0075	0.042	9
Rpain	-0.0222	0.0075	0.042	9
Scamp3	0.0004	0.0075	0.042	9
Snx13	0.0714	0.0075	0.042	9
Ubald1	0.0188	0.0075	0.042	9
Vezf1	0.0305	0.0075	0.042	9
Zfand2a	0.0467	0.0075	0.042	9
Ap3d1	-0.0042	0.0076	0.042	9
Ccz1	0.1396	0.0076	0.042	9
Cdkn2d	0.0031	0.0076	0.042	9
Cst6	-0.1025	0.0076	0.042	9
Dek	0.2292	0.0076	0.042	9
Gid4	0.1699	0.0076	0.042	9
Gsta4	-0.1213	0.0076	0.042	9
Mrps18b	-0.0173	0.0076	0.042	9
Natd1	-0.0158	0.0076	0.042	9
Poglut1	-0.0232	0.0076	0.042	9
Rgs3	-0.0301	0.0076	0.042	9
Rnd1	-0.0011	0.0076	0.042	9
Rnf5	0.3094	0.0076	0.042	9
Rtl6	-0.0195	0.0076	0.042	9
Tmem106b	0.4055	0.0076	0.042	9
Tmpo	0.0527	0.0076	0.042	9
Yme1l1	0.2942	0.0076	0.042	9
Adprm	-0.0214	0.0077	0.042	9
Amer2	0.1421	0.0077	0.042	9
Cdk5r2	0.55	0.0077	0.042	9
Chadl	-0.0511	0.0077	0.042	9
Dvl1	-0.0306	0.0077	0.042	9
Efcab14	0.1633	0.0077	0.042	9
Fhod3	0.0953	0.0077	0.042	9
Gm14305	-0.0618	0.0077	0.042	9
Hivep1	0.0395	0.0077	0.042	9
Hjurp	-0.0235	0.0077	0.042	9
Mta2	-0.0131	0.0077	0.042	9
P3h1	-0.0202	0.0077	0.042	9
Pde9a	0.0875	0.0077	0.042	9
Rhot2	-0.0127	0.0077	0.042	9
Rpap3	0.0926	0.0077	0.042	9
Scyl2	0.1065	0.0077	0.042	9
Slc39a1	0.075	0.0077	0.042	9
Sun1	0.2091	0.0077	0.042	9
Svop	0.0384	0.0077	0.042	9
Tmem132e	-0.0153	0.0077	0.042	9
Wdr34	0.0858	0.0077	0.042	9
Zfp36l2	0.0058	0.0077	0.042	9
Alg3	-0.0365	0.0078	0.042	9
Arhgef15	-0.003	0.0078	0.042	9
Birc6	0.2931	0.0078	0.042	9
Cmc1	0.0699	0.0078	0.042	9
Cul4a	0.2061	0.0078	0.042	9
D1Ertd622e	0.1773	0.0078	0.042	9
Dap3	0.0037	0.0078	0.042	9
Dus2	-0.0264	0.0078	0.042	9
E330009J07Rik	0.1578	0.0078	0.042	9
Epb41l2	0.165	0.0078	0.042	9
Ergic3	-0.1772	0.0078	0.042	9
Fam168a	0.4528	0.0078	0.042	9
Fbxw8	-0.1004	0.0078	0.042	9
Fmn2	0.2411	0.0078	0.042	9
Ifitm10	-0.1463	0.0078	0.042	9
Klhdc4	-0.1004	0.0078	0.042	9
Krt222	0.1347	0.0078	0.042	9
Mid1	0.0492	0.0078	0.042	9
Mrps27	-0.0386	0.0078	0.042	9
Ndufv2	0.2758	0.0078	0.042	9
Nxph1	0.1327	0.0078	0.042	9
Ofd1	-0.0056	0.0078	0.042	9
Rasd2	0.1568	0.0078	0.042	9
Rtcb	0.243	0.0078	0.042	9
Tmem121b	-0.0689	0.0078	0.042	9
Tmsb10	-0.236	0.0078	0.042	9
Tpgs2	0.0341	0.0078	0.042	9
Txndc17	0.0422	0.0078	0.042	9
Wdyhv1	0.0454	0.0078	0.042	9
Ablim2	-0.0162	0.0079	0.042	9
Acadl	0.0364	0.0079	0.042	9
Ankrd28	0.1299	0.0079	0.042	9
Arpp19	0.3578	0.0079	0.042	9
Atf5	0.0065	0.0079	0.042	9
Cfap20	0.2225	0.0079	0.042	9
Cyb5a	0.2208	0.0079	0.042	9
Ift22	-0.114	0.0079	0.042	9
Mtmr6	0.3843	0.0079	0.042	9
N4bp2l2	-0.0076	0.0079	0.042	9
Phlpp1	0.1845	0.0079	0.042	9
Ptpru	-0.1173	0.0079	0.042	9
Rcc1l	-0.029	0.0079	0.042	9
Stk19	-0.0757	0.0079	0.042	9
0610030E20Rik	0	0.008	0.043	9
Abraxas2	0.085	0.008	0.043	9
[truncated: 2,059 more rows]

## Sheet: cluster18
	p_val	avg_logFC	pct.1	pct.2	p_val_adj	cluster	gene
Myl31	3.23842447584157e-55	0.480352975130248	1	0.995	5.92404989365698e-51	18	Myl3
Tnni3	1.73564030622304e-49	0.500010369580627	1	0.998	3.1750068121738e-45	18	Tnni3
Tpm1	2.23402077354064e-41	0.322629772831747	1	0.999	4.08669420103789e-37	18	Tpm1
Mb	5.84252728557353e-41	0.318385875609622	1	0.999	1.06877351634997e-36	18	Mb
Slc25a4	1.89239734585786e-39	0.31355614548069	1	0.997	3.46176246477778e-35	18	Slc25a4
Mgst3	1.28374006282405e-38	0.598380419076097	1	0.891	2.34834569692404e-34	18	Mgst3
Myl21	4.38232005010609e-36	0.323760468932483	1	0.994	8.01657806765907e-32	18	Myl2
Cox4i1	1.14361219585465e-35	0.273236394705188	1	0.996	2.09200978987691e-31	18	Cox4i1
Tnnc1	1.32514497663687e-34	0.337773079560942	1	0.994	2.42408770576182e-30	18	Tnnc1
Etfb	3.60837432036825e-33	0.447017726645456	1	0.953	6.60079914424963e-29	18	Etfb
Tnnt2	1.07617106117324e-31	0.288417069283737	1	0.997	1.9686397222042e-27	18	Tnnt2
S100a1	5.36321124573777e-29	0.385722944479913	1	0.964	9.81092233182811e-25	18	S100a1
Atp5h	1.54446553305316e-28	0.346400005479262	1	0.983	2.82529079961414e-24	18	Atp5h
Chchd10	3.40909199871162e-28	0.276887378053206	1	0.983	6.23625199324316e-24	18	Chchd10
Ech11	3.78494160810147e-27	0.359909966540391	1	0.974	6.92379368370003e-23	18	Ech1
Atp5o.1	4.18607672234633e-27	0.280780405815678	1	0.982	7.65759014818815e-23	18	Atp5o.1
Myh6	5.02605777972971e-26	0.340961589030918	1	1	9.19416749645955e-22	18	Myh6
Cox5b	1.57915482688909e-25	0.26170011557479	1	0.988	2.88874792482822e-21	18	Cox5b
Atp5d	3.59876860243654e-25	0.3021153410449	1	0.97	6.58322740443717e-21	18	Atp5d
Ndufb9	9.52069467718591e-24	0.27164245450299	1	0.978	1.74162067729762e-19	18	Ndufb9
Pgam2	1.13248718576705e-23	0.339918229914462	1	0.945	2.07165880892366e-19	18	Pgam2
Ndufs7	2.12006160009145e-23	0.40687437709351	1	0.942	3.8782286850473e-19	18	Ndufs7
Eno3	3.89772153025916e-23	0.312017801165628	1	0.962	7.13010199530308e-19	18	Eno3
Sdhb	5.63803218586374e-23	0.358552924627883	1	0.965	1.03136522776005e-18	18	Sdhb
Ttll1	8.00165988991873e-23	0.528191733796082	1	0.694	1.46374364366283e-18	18	Ttll1
Csrp3	8.72949913263075e-23	0.324713691099376	1	0.977	1.59688727633214e-18	18	Csrp3
Ndufb8	9.26642642208211e-23	0.262484340608807	1	0.973	1.69510738539148e-18	18	Ndufb8
Uqcrq	1.19747342627078e-22	0.267994505441281	1	0.99	2.19053813867714e-18	18	Uqcrq
Mpc2	3.57337184560994e-22	0.370733108095771	1	0.94	6.53676911717426e-18	18	Mpc2
Mpc11	6.76305602650886e-22	0.346088894657634	1	0.931	1.23716583892927e-17	18	Mpc1
Lrtm12	7.36485559735862e-22	0.372236764341594	0.962	0.515	1.34725303442481e-17	18	Lrtm1
Ndufb11	3.0274283214887e-21	0.302402990563077	1	0.958	5.53807462849929e-17	18	Ndufb11
Fabp31	7.37491904228569e-21	0.26600481560927	1	0.998	1.34909394040532e-16	18	Fabp3
Hspb1	3.20224780521111e-20	0.309153191471436	1	0.88	5.85787191007269e-16	18	Hspb1
Ldhb	4.03407072043831e-20	0.276411951455309	1	0.97	7.37952556889779e-16	18	Ldhb
Cox7b	2.34385995689195e-19	0.260908403643741	1	0.985	4.28762301914244e-15	18	Cox7b
Ndufab1	2.67703031008857e-19	0.264455919229409	1	0.96	4.89709154624503e-15	18	Ndufab1
Cox5a	3.41878028164328e-19	0.302274164437779	1	0.979	6.25397476921006e-15	18	Cox5a
Chchd2	1.14549740047952e-18	0.282247917438173	1	0.966	2.09545839469718e-14	18	Chchd2
Ndufv2	1.68902644030897e-18	0.323905551003034	1	0.94	3.0897360672572e-14	18	Ndufv2
Eci1	5.38593470975249e-18	0.36975716323767	1	0.832	9.85249036455023e-14	18	Eci1
Ndufb2	3.05429295139101e-17	0.294711818785436	1	0.95	5.58721809597958e-13	18	Ndufb2
Ndufs8	4.5073502632718e-17	0.271132435097641	1	0.886	8.2452958366031e-13	18	Ndufs8
Idh2	7.08830782603905e-17	0.255236634877781	1	0.947	1.29666415061732e-12	18	Idh2
Ndufc2	9.65459893099183e-17	0.350036488491813	1	0.874	1.76611578244634e-12	18	Ndufc2
Ndufa12	1.14132539672626e-16	0.32178589207554	1	0.928	2.08782654823135e-12	18	Ndufa12
Ndufs3	5.98190439329252e-16	0.385049400299815	1	0.906	1.094269770665e-11	18	Ndufs3
Fbxl22	2.87545400070749e-15	0.347467589748243	0.951	0.626	5.26006800349421e-11	18	Fbxl22
Prdx5	7.18375434081239e-15	0.343787668076008	1	0.907	1.31412418156481e-10	18	Prdx5
Ndufb6	1.24553206080618e-14	0.290780574844779	1	0.91	2.27845179883274e-10	18	Ndufb6
Map1lc3a	2.05326786506687e-14	0.324940346277341	1	0.928	3.75604290556682e-10	18	Map1lc3a
Ano10	8.36385995473658e-14	0.407415219975213	0.973	0.69	1.53000090151996e-09	18	Ano10
Lars24	9.49478605132076e-14	0.278786521798548	0.902	0.524	1.73688121236811e-09	18	Lars2
Mrpl12	1.05575016914389e-13	0.345434679851938	1	0.835	1.93128378441492e-09	18	Mrpl12
Kcnip2	2.82940017554548e-13	0.252007930065893	0.984	0.682	5.17582174112534e-09	18	Kcnip2
Psmb6	1.42020446213118e-12	0.328860450488649	0.995	0.757	2.59798002257656e-08	18	Psmb6
Swi5	5.80834678017199e-12	0.280392432952784	0.995	0.791	1.06252087649686e-07	18	Swi5
Ndufs4	2.35905432833754e-11	0.303384118130739	1	0.88	4.31541808282786e-07	18	Ndufs4
Idh3b	4.36419393897359e-11	0.251730868237172	1	0.895	7.98341997256439e-07	18	Idh3b
Scand1	8.35478638611467e-11	0.274198829602137	0.929	0.661	1.52834107361196e-06	18	Scand1
Acot13	1.04052324531812e-10	0.26760355331801	1	0.912	1.90342917266044e-06	18	Acot13
Hsd17b10	1.89097772598194e-10	0.286232618025829	0.962	0.717	3.45916555413876e-06	18	Hsd17b10
