# Supplementary material for: Spatially resolved multiomics on the neuronal effects induced by spaceflight
Source: Research Square preprint supplement (doi:10.21203/rs.3.rs-2865086/v1), 2023-05-31
Supplement: Supplementary file 4 [file 6e4abac31f8632f03c15c045.xlsx]

## Sheet: Sheet1
Supplementary Table 7: Deconvolution results using Stereoscope. ST clusters that matched with celltype proportions (multiomics clusters) found by deconvolution using Stereoscope.
multiomics cluster	multiomics functions	matching ST cluster	ST cluster functions
0	Neuronal activity and synaptic transmission in immature neural cells and telencephalon projecting neurons	None	NA
1	Synaptic transmission in di- and mesencephalon neurons	0.2	GABAergic synapses in midbrain, dopaminergic neurogenesis in the neuroendocrine system
2	Neuronal activity and synaptic transmission in cholinergic, monoaminergic and peptidergic neurons	1, 3, 6, 7, 8, 15	Neuronal development in midbrain, piriform cortex, amygdala, hippocampus, entorhinal cortex, retrosplenial cortex
3	Myelination in oligodendrocytes	4.12	Myelination in white matter: corpus callosum, stria terminalis, cerebral peduncles
4	Astrocyte functions: regulation of neurotransmission and neurovasculature	10, 17	Neuronal and synaptic development in hippocampus; and functions of choroid plexus
5	Synaptic transmission in telencephalon interneurons	None	NA
6	(Glutamatergic) synaptic transmission in cholinergic, monoaminergic and peptidergic neurons	9, 12, 15	Axon guidance, cell migration in cortex
7	Glial development	17	Choroid plexus
8	(Glutamatergic) synaptic transmission in di- and mesencephalon neurons	None	NA
9	Development of neuronal processes in neural crest-like glia	None	NA
10	Immune functions in microglia	4, 10, 17	White matter, choroid plexus, synaptic development in hippocampus
11	Neuronal activity and (GABAergic) synaptic transmission in telencephalon interneurons	10	Synaptic development in hippocampus
12	Vasculature (mostly brain vascular endothelial cells)	16, 13, 17	Neurons and glia around ventricles, in neurovasculature and around choroid plexus
13	Neuronal activity and synaptic transmission in di- and mesencephalon neurons	None	NA
14	Synaptic transmission in the neuroendocrine system	14	Dopaminergic signaling in caudate/putamen and amygdala
15	Neuronal activity and synaptic transmission in di- and	5	Neuronal development, functions and stress in thalamus
16	(Glutamatergic) synaptic transmission in di- and mesencephalon neurons	15, 0	Neurodevelopment in midbrain and retrosplenial cortex
17	Synaptic transmission in cholinergic, monoaminergic and peptidergic neurons	11, 8, 6, 3, 10	Cell development, migration and synapse development in hippocampus, piriform cortex, amygdala

## Sheet: cluster18
	p_val	avg_logFC	pct.1	pct.2	p_val_adj	cluster	gene
Myl31	3.23842447584157e-55	0.480352975130248	1	0.995	5.92404989365698e-51	18	Myl3
Tnni3	1.73564030622304e-49	0.500010369580627	1	0.998	3.1750068121738e-45	18	Tnni3
Tpm1	2.23402077354064e-41	0.322629772831747	1	0.999	4.08669420103789e-37	18	Tpm1
Mb	5.84252728557353e-41	0.318385875609622	1	0.999	1.06877351634997e-36	18	Mb
Slc25a4	1.89239734585786e-39	0.31355614548069	1	0.997	3.46176246477778e-35	18	Slc25a4
Mgst3	1.28374006282405e-38	0.598380419076097	1	0.891	2.34834569692404e-34	18	Mgst3
Myl21	4.38232005010609e-36	0.323760468932483	1	0.994	8.01657806765907e-32	18	Myl2
Cox4i1	1.14361219585465e-35	0.273236394705188	1	0.996	2.09200978987691e-31	18	Cox4i1
Tnnc1	1.32514497663687e-34	0.337773079560942	1	0.994	2.42408770576182e-30	18	Tnnc1
Etfb	3.60837432036825e-33	0.447017726645456	1	0.953	6.60079914424963e-29	18	Etfb
Tnnt2	1.07617106117324e-31	0.288417069283737	1	0.997	1.9686397222042e-27	18	Tnnt2
S100a1	5.36321124573777e-29	0.385722944479913	1	0.964	9.81092233182811e-25	18	S100a1
Atp5h	1.54446553305316e-28	0.346400005479262	1	0.983	2.82529079961414e-24	18	Atp5h
Chchd10	3.40909199871162e-28	0.276887378053206	1	0.983	6.23625199324316e-24	18	Chchd10
Ech11	3.78494160810147e-27	0.359909966540391	1	0.974	6.92379368370003e-23	18	Ech1
Atp5o.1	4.18607672234633e-27	0.280780405815678	1	0.982	7.65759014818815e-23	18	Atp5o.1
Myh6	5.02605777972971e-26	0.340961589030918	1	1	9.19416749645955e-22	18	Myh6
Cox5b	1.57915482688909e-25	0.26170011557479	1	0.988	2.88874792482822e-21	18	Cox5b
Atp5d	3.59876860243654e-25	0.3021153410449	1	0.97	6.58322740443717e-21	18	Atp5d
Ndufb9	9.52069467718591e-24	0.27164245450299	1	0.978	1.74162067729762e-19	18	Ndufb9
Pgam2	1.13248718576705e-23	0.339918229914462	1	0.945	2.07165880892366e-19	18	Pgam2
Ndufs7	2.12006160009145e-23	0.40687437709351	1	0.942	3.8782286850473e-19	18	Ndufs7
Eno3	3.89772153025916e-23	0.312017801165628	1	0.962	7.13010199530308e-19	18	Eno3
Sdhb	5.63803218586374e-23	0.358552924627883	1	0.965	1.03136522776005e-18	18	Sdhb
Ttll1	8.00165988991873e-23	0.528191733796082	1	0.694	1.46374364366283e-18	18	Ttll1
Csrp3	8.72949913263075e-23	0.324713691099376	1	0.977	1.59688727633214e-18	18	Csrp3
Ndufb8	9.26642642208211e-23	0.262484340608807	1	0.973	1.69510738539148e-18	18	Ndufb8
Uqcrq	1.19747342627078e-22	0.267994505441281	1	0.99	2.19053813867714e-18	18	Uqcrq
Mpc2	3.57337184560994e-22	0.370733108095771	1	0.94	6.53676911717426e-18	18	Mpc2
Mpc11	6.76305602650886e-22	0.346088894657634	1	0.931	1.23716583892927e-17	18	Mpc1
Lrtm12	7.36485559735862e-22	0.372236764341594	0.962	0.515	1.34725303442481e-17	18	Lrtm1
Ndufb11	3.0274283214887e-21	0.302402990563077	1	0.958	5.53807462849929e-17	18	Ndufb11
Fabp31	7.37491904228569e-21	0.26600481560927	1	0.998	1.34909394040532e-16	18	Fabp3
Hspb1	3.20224780521111e-20	0.309153191471436	1	0.88	5.85787191007269e-16	18	Hspb1
Ldhb	4.03407072043831e-20	0.276411951455309	1	0.97	7.37952556889779e-16	18	Ldhb
Cox7b	2.34385995689195e-19	0.260908403643741	1	0.985	4.28762301914244e-15	18	Cox7b
Ndufab1	2.67703031008857e-19	0.264455919229409	1	0.96	4.89709154624503e-15	18	Ndufab1
Cox5a	3.41878028164328e-19	0.302274164437779	1	0.979	6.25397476921006e-15	18	Cox5a
Chchd2	1.14549740047952e-18	0.282247917438173	1	0.966	2.09545839469718e-14	18	Chchd2
Ndufv2	1.68902644030897e-18	0.323905551003034	1	0.94	3.0897360672572e-14	18	Ndufv2
Eci1	5.38593470975249e-18	0.36975716323767	1	0.832	9.85249036455023e-14	18	Eci1
Ndufb2	3.05429295139101e-17	0.294711818785436	1	0.95	5.58721809597958e-13	18	Ndufb2
Ndufs8	4.5073502632718e-17	0.271132435097641	1	0.886	8.2452958366031e-13	18	Ndufs8
Idh2	7.08830782603905e-17	0.255236634877781	1	0.947	1.29666415061732e-12	18	Idh2
Ndufc2	9.65459893099183e-17	0.350036488491813	1	0.874	1.76611578244634e-12	18	Ndufc2
Ndufa12	1.14132539672626e-16	0.32178589207554	1	0.928	2.08782654823135e-12	18	Ndufa12
Ndufs3	5.98190439329252e-16	0.385049400299815	1	0.906	1.094269770665e-11	18	Ndufs3
Fbxl22	2.87545400070749e-15	0.347467589748243	0.951	0.626	5.26006800349421e-11	18	Fbxl22
Prdx5	7.18375434081239e-15	0.343787668076008	1	0.907	1.31412418156481e-10	18	Prdx5
Ndufb6	1.24553206080618e-14	0.290780574844779	1	0.91	2.27845179883274e-10	18	Ndufb6
Map1lc3a	2.05326786506687e-14	0.324940346277341	1	0.928	3.75604290556682e-10	18	Map1lc3a
Ano10	8.36385995473658e-14	0.407415219975213	0.973	0.69	1.53000090151996e-09	18	Ano10
Lars24	9.49478605132076e-14	0.278786521798548	0.902	0.524	1.73688121236811e-09	18	Lars2
Mrpl12	1.05575016914389e-13	0.345434679851938	1	0.835	1.93128378441492e-09	18	Mrpl12
Kcnip2	2.82940017554548e-13	0.252007930065893	0.984	0.682	5.17582174112534e-09	18	Kcnip2
Psmb6	1.42020446213118e-12	0.328860450488649	0.995	0.757	2.59798002257656e-08	18	Psmb6
Swi5	5.80834678017199e-12	0.280392432952784	0.995	0.791	1.06252087649686e-07	18	Swi5
Ndufs4	2.35905432833754e-11	0.303384118130739	1	0.88	4.31541808282786e-07	18	Ndufs4
Idh3b	4.36419393897359e-11	0.251730868237172	1	0.895	7.98341997256439e-07	18	Idh3b
Scand1	8.35478638611467e-11	0.274198829602137	0.929	0.661	1.52834107361196e-06	18	Scand1
Acot13	1.04052324531812e-10	0.26760355331801	1	0.912	1.90342917266044e-06	18	Acot13
Hsd17b10	1.89097772598194e-10	0.286232618025829	0.962	0.717	3.45916555413876e-06	18	Hsd17b10
