# Supplementary material for: Spatially resolved multiomics on the neuronal effects induced by spaceflight
Source: Research Square preprint supplement (doi:10.21203/rs.3.rs-2865086/v1), 2023-05-31
Supplement: Supplementary file 5 [file 778de9622d1606f8e73570f3.xlsx]

## Sheet: Sheet1
Supplementary Table 8: Motif analysis. Top 10 motifs analysed for multiomics clusters using ATACseq peaks.
Motif	Cluster ID (multiomics clusters)	Functions of motif	Motif direction in Flight samples
NA	0	NA	NA
NA	1	NA	NA
Ptf1a(var2)	2	Cerebellar and retinal development	Up
NA	3	NA	NA
Tcf21	4	Development: spleen, heart, artery (vasculogenesis??)	Up
Zic1::Zic2	4, 14	Zn finger proteins. Zic1: Neurogenesis, axonogenesis, cerebellar and pontine neuron locations. Zic2: neurogenesis especially in visual system.	Down
NA	5	NA	NA
NA	6	NA	NA
NA	7	NA	NA
NA	8	NA	NA
NA	9	NA	NA
NA	10	NA	NA
Atoh1	11, 14	Neurogenesis; Notch signaling	Down
Bhlha15	11, 14	Mitochondrial Ca ion transport, organelle localization	Down
Rarb	11	Zn finger. Receptor for retinoic acid. Development.	Down
Twist2	11	Represses expression of TNFa, IL1b (pro-inflammatory cytokines)	Down
Pparg::Rxra	11	Pparg: fatty acid oxidation, represses NFkB (pro-inflammatory), cardiovascular circadian rhythms. Rxra: retinoic acid receptor, promotes myelin debris phagocytosis and remyelination, represses innate immune responses to viruses.	Down
Nr2f6	11	Represses hormone responses, represses IL-17 immune responses, supports forebrain circadian clock development. Zn finger.	Down
Rarg	11	Retinoic acid receptor. Development.	Down
Pou5f1::Sox2	11	Pou5f1: embryonic stem cell pluripotency. Sox2: keeps neuronal cells undifferentiated (pluripotent). Both are two of the 4 Yamanaka factors that are used to induce iPSC development.	Up
NA	12	NA	NA
NA	13	NA	NA
Plagl1	14	Zn finger protein.	Down
Wt1	14	Cell development.	Up
Hic1	14	Development, tumor suppressor, p53 DNA damage response regulator (downregulates SIRT1)	Down
Ahr::Arnt	14	Ahr: aryl hydrocarbon receptor. Immunity, angiogenesis, astrocyte functions, circadian regulation. Arnt: aryl hydrocarbon nuclear receptor. Hypoxia.	Up
NR4A2	14	Differentiation and maintenance of dopaminergic neurons.	Down
Esrrg	14	Estrogen-related receptor gamma. Zinc finger domain.	Down
NA	15	NA	NA
NA	16	NA	NA
NA	17	NA	NA
Motifs of no relevance to brain tissue or spaceflight are marked NA.
Motifs repeated in multiple clusters are highlighted in yellow.
