# Supplementary material for: Spatially resolved multiomics on the neuronal effects induced by spaceflight
Source: Research Square preprint supplement (doi:10.21203/rs.3.rs-2865086/v1), 2023-05-31
Supplement: Supplementary file 6 [file 77ccd9a928e4a45a064b7971.xlsx]

## Sheet: Sheet1
Supplementary Table 10: Metabolic analysis results for multiomics dataset. FGSEA results with adjusted p-values for multiomics (snRNA-seq and snATAC-seq combined) RR3 brain clusters.
dataset	cluster	Cluster assignment	Metabolic pathway	pval	padj	log2err	ES	NES	size	leadingEdge genes
Multiomic single-cell	0	Neuronal activity and synaptic transmission in immature neural cells and telencephalon projecting neurons	Oxidative phosphorylation	1,42E-26	1,15E-24	133449749	-8551922	-27728523	76	Cox8a,Ndufa4,Cox6a1,Cox4i1,Ndufa13,Atp5b,Cox5b,Ndufs7,Ndufb8,Ndufc2,Ndufb11,Uqcrq,Cyc1,Cox6b1,Atp5j,Cox5a,Atp5h,Atp5d,Ndufb7,Atp5o,Cox7a2,Uqcr10,Uqcr11,Ndufa1,Ndufa11,Cox6c,Ndufs8,Ndufa12,Atp5j2,Atp5g2,Ndufs5,Atp5f1,Ndufa6,Uqcrh,Uqcrb,Ndufb10,Ndufa2,Atp5g1,Ndufb9,Ndufa8,Ndufv3,Atp5e,Ndufs2,Ndufa7,Ndufa5,Cox7a2l,Ndufb2,Atp5l,Ndufs6,Cox7c,Ndufa3,Ndufab1,Atp5k,Ndufv2
Multiomic single-cell	2	Neuronal activity and synaptic transmission in cholinergic, monoaminergic and peptidergic neurons	Oxidative phosphorylation	6,94E-16	5,90E-14	102766987	-7625741	-23614667	78	Cox8a,Ndufa4,Cox6b1,Cox6c,Atp5j,Cox7c,Ndufc2,Cox5b,Atp5h,Atp5f1,Ndufb4,Cox7a2,Cox4i1,Cox6a1,Ndufa3,Ndufa6,Atp5g1,Ndufa13,Cox5a,Atp5b,Uqcr11,Cyc1,Atp5d,Atp5l,Ndufs1,Ndufs7,Cox7b,Atp5j2,Ndufb8,Atp5g2,Ndufs8,Ndufb5,Ndufa7,Ndufa5,Ndufb9,Uqcrq,Ndufa1,Ndufs5,Ndufb10,Ndufv3,Ndufb11,Ndufs3,Atp5o,Ndufa9,Ndufa12,Uqcrb,Uqcrfs1,Uqcr10,Ndufs6,Ndufb2,Atp5a1,Atp5k,Ndufa2,Ndufa8,Ndufa11
Multiomic single-cell	3	Myelination in oligodendrocytes	Oxidative phosphorylation	4,16E-15	3,45E-13	99698622	-7159277	-26741591	77	Ndufa4,Cox5b,Ndufa13,Ndufb7,Ndufb2,Cox4i1,Ndufb8,Atp5b,Cox8a,Atp5f1,Atp5h,Ndufb9,Atp5j,Uqcrq,Ndufc2,Ndufa8,Cox6b1,Ndufa11,Cox5a,Uqcrh,Atp5j2,Ndufa6,Ndufs6,Cox7a2,Ndufs2,Uqcrc1,Ndufa12,Uqcrb,Ndufs8,Ndufc1,Atp5g1,Atp5o,Ndufa7,Ndufa3,Uqcr10,Atp5k,Ndufb11,Atp5a1,Ndufb10,Ndufv3,Uqcrc2
Multiomic single-cell	1	Synaptic transmission in di- and mesencephalon neurons	Oxidative phosphorylation	1,21E-12	1,03E-10	91011973	-7366426	-23114147	78	Cox8a,Cox6a1,Ndufa4,Cox4i1,Cox6c,Cox5a,Ndufb11,Ndufb7,Cox6b1,Cyc1,Cox7a2,Ndufs7,Ndufs3,Atp5h,Cox5b,Atp5j,Atp5l,Ndufa13,Atp5o,Atp5g1,Cox7c,Ndufb8,Uqcr11,Uqcrh,Ndufa3,Ndufs5,Atp5e,Atp5f1,Cox7b,Atp5k,Uqcrb,Ndufc1,Ndufb10,Ndufc2,Ndufa5,Atp5b,Cox7a2l,Atp5d,Uqcr10,Ndufs6,Ndufa2,Atp5g2,Ndufv3,Ndufa7,Ndufs2,Ndufa12,Ndufa8,Ndufa6,Atp5j2,Ndufb9,Uqcrq,Ndufab1,Uqcrc2,Ndufb2
Multiomic single-cell	4	Astrocyte functions: regulation of neurotransmission and neurovasculature	Oxidative phosphorylation	2,36E-12	1,98E-10	89867123	-7368948	-24036646	78	Cox8a,Cox4i1,Cox6a1,Cox5b,Ndufa4,Ndufs7,Cox7c,Ndufb9,Atp5j,Atp5o,Ndufc2,Atp5l,Ndufa6,Ndufa1,Atp5f1,Ndufs4,Cox7a2,Ndufb7,Ndufs3,Atp5g1,Cyc1,Ndufb8,Ndufv1,Cox6b1,Ndufs5,Ndufv2,Nsf,Uqcr11,Ndufa2,Atp5e,Cox5a,Uqcrq,Atp5b,Cox7b,Ndufa8,Atp5j2,Ndufa13,Atp5g2,Uqcr10,Atp5d,Ndufab1,Ndufb10,Uqcrb,Ndufb11,Ndufb3,Atp5k,Cox6c,Uqcrh,Ndufa5,Ndufa12,Ndufs8,Ndufa11,Uqcrc1,Ndufs2,Ndufv3,Atp5h
Multiomic single-cell	8	(Glutamatergic) synaptic transmission in di- and mesencephalon neurons	Oxidative phosphorylation	3,20E-09	2,72E-07	77493903	-6452466	-22098879	77	Cox8a,Ndufa3,Cox5b,Atp5j,Atp5d,Cyc1,Ndufs2,Ndufs7,Atp5b,Cox7c,Atp5o,Atp5c1,Ndufa12,Ndufa1,Cox7b,Cox6b1,Uqcrh,Ndufa8,Cox6a1,Ndufc2,Uqcrq,Atp5j2,Ndufab1,Atp5f1,Ppa2,Ndufb10,Ndufb11,Ndufs3,Ndufb8,Uqcr11,Ndufc1,Atp5g1,Ndufa5,Ndufa4,Cox5a
Multiomic single-cell	9	Development of neuronal processes in neural crest-like glia	Oxidative phosphorylation	1,95E-08	1,64E-06	73376199	-6421319	-21246218	77	Cox8a,Ndufa4,Cyc1,Cox7a2,Atp5b,Ndufv2,Ndufs7,Atp5h,Atp5g1,Atp5g2,Uqcr10,Atp5j,Ndufb2,Cox6c,Ndufa13,Uqcrh,Uqcr11,Cox6a1,Ndufa5,Cox7b,Cox4i1,Cox5b,Atp5a1,Ndufb3,Ndufs2,Ndufv3,Ndufc2,Cox7c,Ndufb11,Cox6b1,Ndufb8,Ndufs4,Uqcrb,Ndufb10,Atp5d,Ndufa11,Ndufa1,Ndufs6,Tusc3,Ndufa6,Ndufa7
Multiomic single-cell	17	Synaptic transmission in cholinergic, monoaminergic and peptidergic neurons	Oxidative phosphorylation	3,23E-08	2,71E-06	71951283	-6171109	-21081692	78	Atp5j,Cox8a,Ndufa4,Uqcrh,Cox6a1,Ndufab1,Cox5a,Ndufs3,Ndufa13,Cox5b,Cyc1,Cox4i1,Atp5a1,Ndufa2,Atp5c1,Cox6b1,Cox7a2,Cox6c,Ndufa3,Ndufa6,Ndufa5,Atp5g2,Ndufb8,Atp5e,Ndufb9,Atp5d,Ndufv3,Uqcrb,Uqcrfs1,Ndufv2,Cox7b,Ndufb11
Multiomic single-cell	5	Synaptic transmission in telencephalon interneurons	Oxidative phosphorylation	6,10E-08	5,18E-06	70497572	-6219273	-2121813	80	Cox8a,Atp5j2,Ndufs5,Cox6a1,Cyc1,Ndufs7,Ndufb10,Atp5j,Cox6b1,Ndufa6,Ndufa9,Cox5b,Ndufb5,Atp5b,Ndufv1,Ndufb6,Cox7a2,Cox4i1,Ndufb7,Uqcrc1,Uqcr11,Ndufb8,Ndufb3,Ndufa11,Ndufa4,Ndufb11,Ndufv2,Cox6c,Uqcrh,Atp5h,Ndufa7,Atp5e,Hdhd2,Uqcrq,Ndufc1,Atp5f1,Ndufc2,Ndufa13,Ndufa5,Ndufab1
Multiomic single-cell	15	Neuronal activity and synaptic transmission in di- and mesencephalon neurons	Oxidative phosphorylation	2,34E-07	1,97E-05	69013246	-6151481	-20531335	80	Cox6b1,Cox8a,Cox5a,Atp5g2,Atp5k,Atp5j2,Cox7c,Ndufb2,Cox4i1,Atp5l,Ndufs7,Atp5d,Ndufa10,Ppa1,Ndufv2,Ndufb5,Atp5b,Cox6c,Ndufs5,Ndufa8,Ndufa13,Uqcrq,Atp5g1,Uqcrh,Ndufv1,Hdhd2,Atp5o,Ndufc2,Ndufa3,Cox7a2,Cox6a1
Multiomic single-cell	7	Glial development	Oxidative phosphorylation	4,11E-07	3,41E-05	67496286	-5626342	-21276988	78	Cox4i1,Cox8a,Ndufb7,Cox6a1,Uqcrq,Ndufb2,Cox6b1,Atp5b,Ndufv2,Ndufs8,Ndufab1,Atp5h,Cox5a,Cox5b,Ndufa4,Ndufv3,Uqcrb,Ndufa11,Atp5d,Ndufa5,Ndufs5,Ndufa13,Atp5j2,Ndufb11,Atp5e,Ndufc1,Tusc3,Ndufb5,Ndufs3
Multiomic single-cell	6	(Glutamatergic) synaptic transmission in cholinergic, monoaminergic and peptidergic neurons	Oxidative phosphorylation	2,46E-06	209215	62725674	-6034818	-18781522	79	Ndufa1,Ndufa4,Atp5h,Atp5f1,Ndufb11,Cox8a,Ndufs7,Atp5g1,Cox5b,Ndufa6,Atp5g2,Atp5o,Ndufc2,Cyc1,Uqcrq,Ppa2,Atp5d,Cox6c,Hdhd2,Uqcrh,Ndufab1,Ndufb9,Ndufa13,Ndufb8,Atp5b,Atp5j,Atp5l,Cox4i1,Ndufa11,Uqcr10,Uqcrc1,Cox7c
Multiomic single-cell	10	Immune functions in microglia	Oxidative phosphorylation	7,98E-06	669987	59332548	-4998558	-20768553	76	Ndufa4,Uqcrq,Cox4i1,Ndufa11,Atp5l,Nsf,Ndufa6,Ndufb10,Ndufs2,Cox5a,Ndufb6,Cox6c,Atp5h,Ndufb7,Atp5j,Cox7c,Cox8a,Cox5b,Ndufa5,Ndufab1,Atp5b,Cox7b,Atp5k,Ndufs7,Atp5a1,Ndufa7,Cyc1,Ndufs3,Ndufb9,Atp5d,Atp5o
Multiomic single-cell	2	Neuronal activity and synaptic transmission in cholinergic, monoaminergic and peptidergic neurons	Glycolysis/gluconeogenesis	5,35E-05	2275436	55733224	-7208578	-18964597	28	Gapdh,Eno2,Pkm,Ldhb,Pgam1,Pgm1,Pgk1,Tpi1,Bpgm,Acss2,G6pc3,Gapdhs,Gpi1,Ldha,Mia3
Multiomic single-cell	1	Synaptic transmission in di- and mesencephalon neurons	Transport extracellular	8,73E-05	3708443	5384341	-5093883	-17071275	134	Slc4a4,Slc1a3,Slc17a7,Atp1a1,Atp1a2,Slc12a2,Slc1a2,Abca2,Atp1b2,Bsg,Atp2b1,Slc38a2,Atp1b1,Slc8a2,Slc12a5,Slc5a6,Slc20a2,Atp1b3,Slc43a2,Atp2b3,Slc5a3,Slc6a5,Slc2a12,Atp2b2,Abca7,Atp11c,Slc36a1,Slc12a6,Slc12a4,Slc7a8,Slc7a6,Slc7a2,Abca8b,Slc6a9,Slc22a14,Slc29a4,Slc38a1,Slc7a11,Slc7a10,Slc25a19,Aqp4,Slc36a4,Slc24a2,Abca1,Abca3,Slc9a1,Tpp1,Atp1a3
Multiomic single-cell	9	Development of neuronal processes in neural crest-like glia	Transport extracellular	22395	9406035	51884808	-4775722	-16768674	126	Slc24a2,Atp1a1,Abca2,Slco3a1,Slc4a4,Atp1b1,Atp2b3,Bsg,Atp1b2,Atp2b1,Atp1a3,Slc12a2,Atp2b2,Slc20a1,Rhcg,Slc36a1,Slc12a5,Slc23a2,Slc17a7,Abca7,Slc7a6,Abcb6,Slc25a1,Slc4a3,Atp8a2,Slc2a1,Slc9a5,Atp10a,Slc20a2,Atp11b,Abca9,Atp1b3,Slc8a3,Slc2a3,Slc43a2,Slc6a9
Multiomic single-cell	15	Neuronal activity and synaptic transmission in di- and mesencephalon neurons	Arachidonic acid metabolism	35535	14924718	49849311	-8700294	-17992675	8	Cbr1,Gpx4
Multiomic single-cell	11	Neuronal activity and (GABAergic) synaptic transmission in telencephalon interneurons	Oxidative phosphorylation	34376	28875626	49849311	-5335035	-17671491	78	Atp5g1,Cox6a1,Cox8a,Cox4i1,Atp5o,Atp5j,Ndufa6,Ndufa4,Ndufs3,Atp5b,Cox5b,Cox6b1,Ndufs1,Cox7a2l,Ndufa12,Ndufa11,Ndufa13,Ndufs7,Atp5d,Cox5a,Ndufa5,Ndufb11,Cox6c,Cyc1,Atp5e
Multiomic single-cell	3	Myelination in oligodendrocytes	Fatty acid synthesis	75352	31271032	47727082	-7270343	-19042905	15	Scd2,Tecr,Tbcb,Hsd17b12,Higd2a,Elovl1,Scd3,Scd1,Fads1
Multiomic single-cell	12	Vasculature	Oxidative phosphorylation	40704	34598066	49849311	-4772139	-1781624	79	Atp5l,Cox8a,Ndufs2,Ndufb9,Ndufa6,Atp5o,Cox5a,Ndufa11,Ndufa3,Cox6a1,Atp5j2,Uqcr11,Atp5d,Cox4i2,Ndufa8,Cox6c,Ndufa13,Atp5b,Ndufc2,Cox7a2,Cox6b2,Uqcrq,Ndufb7,Ndufc1,Atp5e,Ndufa5,Cox7c,Nsf,Atp5f1,Atp5g2,Cox5b,Ndufa4
Multiomic single-cell	0	Neuronal activity and synaptic transmission in immature neural cells and telencephalon projecting neurons	Glycolysis/gluconeogenesis	15512	62823664	45505987	-6995959	-18433807	22	Gapdh,Pkm,Pgam1,Tpi1,Ldhb,Gpi1,Eno2
Multiomic single-cell	3	Myelination in oligodendrocytes	O-glycan metabolism	230815	63858909	4317077	67040198	184479964	15	Galnt13,Galntl6,Galnt1,Galnt5,Galnt16,Galnt10,Galnt11,C1galt1
Multiomic single-cell	6	(Glutamatergic) synaptic transmission in cholinergic, monoaminergic and peptidergic neurons	ROS detoxification	162883	69225229	45505987	-9871208	-14437873	2	Sod2
Multiomic single-cell	11	Neuronal activity and (GABAergic) synaptic transmission in telencephalon interneurons	Beta-Alanine metabolism	165163	69368381	45505987	94374002	169314209	4	Gad1,Gad2,Abat
Multiomic single-cell	0	Neuronal activity and synaptic transmission in immature neural cells and telencephalon projecting neurons	Fatty acid synthesis	352061	71292357	29723292	-7335035	-17687902	15	Tecr,Scd2,Higd2a,Hsd17b12,Tbcb,Scd1
Multiomic single-cell	0	Neuronal activity and synaptic transmission in immature neural cells and telencephalon projecting neurons	Transport lysosomal	345075	71292357	29723292	-7152991	-17752116	17	Atp6v0c,Atp6v0e2,Atp6v1f,Atp6v0b,Atp6v1e1,Atp6v1g2,Atp6v1d,Atp6v1c1,Atp6v1b2,Atp6v1g1
Multiomic single-cell	13	Neuronal activity and synaptic transmission in di- and mesencephalon neurons	Oxidative phosphorylation	84943	72201643	47727082	-5145687	-16687459	77	Cox6b1,Ndufs7,Cox6c,Cox8a,Ndufs1,Ndufa3,Ndufa5,Atp5o,Uqcr10,Atp5j,Ndufb9,Ndufc2,Atp5c1,Ndufa11,Cyc1,Ndufb8,Cox6a1,Cox5b,Uqcrq,Cox4i1,Uqcrfs1,Atp5f1,Ndufb6,Ndufv2,Ndufs6,Cox7a2,Atp5d,Ndufa4,Atp5g2,Cox5a,Cox7b
Multiomic single-cell	3	Myelination in oligodendrocytes	Eicosanoid metabolism	359644	74626159	33506856	-8180016	-17279236	7	Ptgds,Ptges3
Multiomic single-cell	0	Neuronal activity and synaptic transmission in immature neural cells and telencephalon projecting neurons	Fructose and mannose metabolism	580098	78313253	23205682	-733101	-17380867	14	Aldoa,Aldoc,Pfkm,Pmm1,Akr1a1
Multiomic single-cell	0	Neuronal activity and synaptic transmission in immature neural cells and telencephalon projecting neurons	Thiamine metabolism	570866	78313253	26984231	99717662	13301349	1	Tpk1
Multiomic single-cell	3	Myelination in oligodendrocytes	Miscellaneous	541126	8982684	26521689	-7012951	-17625004	13	Cnp,Fth1,Car2,Ftl1,Bckdha,Dbt,Car14
Multiomic single-cell	4	Astrocyte functions: regulation of neurotransmission and neurovasculature	Transport lysosomal	218149	9162247	4317077	-7234087	-18279954	19	Atp6v0c,Atp6v0b,Atp6v0d1,Atp6v1d,Atp6v1g2,Atp6v1f,Atp6v0e2,Atp6v0a1,Atp6v1b2
