# Supplementary material for: Spatially resolved multiomics on the neuronal effects induced by spaceflight
Source: Research Square preprint supplement (doi:10.21203/rs.3.rs-2865086/v1), 2023-05-31
Supplement: Supplementary file 7 [file ba61b4222e4dad8bd2f931dd.xlsx]

## Sheet: Sheet1
Supplementary Table 5: ST cluster marker genes. Marker genes identified for the 18 spatial (ST) clusters in RR3 brain data.
gene	p_val	avg_log2FC	pct.1	pct.2	p_val_adj	cluster
Spp1	0	77.4972	0.25	0.051	0	0
Syt2	0	3.10835	0.565	0.193	0	0
Gata3	0	2.53468	0.177	0.017	0	0
Steap2	8.68587e-285	4.95196	0.4	0.152	1.27074e-280	0
Esrrg	6.80262e-269	12.4053	0.39	0.153	9.95224e-265	0
Pitx2	7.73833e-256	6.02917	0.12	0.016	1.13212e-251	0
Zfhx4	3.32114e-225	2.9636	0.375	0.153	4.85883e-221	0
Klhdc8a	2.11159e-216	4.31827	0.38	0.161	3.08926e-212	0
Rassf4	4.44025e-216	0.64493	0.177	0.042	6.49608e-212	0
Selenop	1.96914e-211	2.74974	0.831	0.669	2.88086e-207	0
Pvalb	8.91299e-197	211.036	0.702	0.486	1.30397e-192	0
Phlda3	2.22665e-188	0.980302	0.551	0.321	3.25758e-184	0
Slc32a1	2.98704e-187	13.3425	0.678	0.479	4.37003e-183	0
Fgf1	7.61336e-175	3.10685	0.522	0.303	1.11383e-170	0
Cacna2d2	3.79509e-171	1.38754	0.435	0.221	5.55222e-167	0
Ctxn3	8.93005e-168	2.53775	0.148	0.037	1.30647e-163	0
Pcp4l1	1.37414e-166	24.6752	0.695	0.501	2.01037e-162	0
Kctd9	4.38178e-165	4.229	0.313	0.133	6.41054e-161	0
Gad2	7.48253e-160	27.1823	0.724	0.558	1.09469e-155	0
Nefm	1.95336e-152	31.9588	0.734	0.563	2.85776e-148	0
Mef2c	0	32.0354	0.898	0.629	0	1
Pamr1	0	9.3717	0.393	0.126	0	1
Gm765	0	8.94927	0.15	0.013	0	1
Stx1a	0	5.91664	0.752	0.448	0	1
Arc	0	4.77461	0.711	0.377	0	1
Gm11549	0	2.61868	0.427	0.124	0	1
Igfn1	0	1.1133	0.186	0.029	0	1
Satb2	0	1.02339	0.474	0.145	0	1
Hkdc1	0	0.596858	0.195	0.034	0	1
Sytl1	4.09894e-295	0.564119	0.158	0.024	5.99675e-291	1
Nr4a1	1.67953e-289	11.826	0.715	0.444	2.45715e-285	1
Tcap	2.15903e-287	0.68454	0.166	0.027	3.15867e-283	1
Pdzrn3	1.17915e-283	5.4228	0.332	0.107	1.72509e-279	1
Lamc2	7.3678e-274	1.51013	0.252	0.065	1.07791e-269	1
Camk2n1	8.26067e-268	182.089	0.997	0.959	1.20854e-263	1
Egr2	7.21767e-265	7.1664	0.273	0.078	1.05595e-260	1
Krt12	9.10517e-265	1.155	0.289	0.086	1.33209e-260	1
Egr4	1.43021e-250	22.2865	0.563	0.296	2.0924e-246	1
Epop	1.13333e-242	2.63393	0.446	0.198	1.65806e-238	1
Egr3	9.45002e-231	4.4264	0.697	0.442	1.38254e-226	1
Pmch	0	Inf	0.467	0.14	0	2
Cartpt	0	238.373	0.523	0.12	0	2
Resp18	0	181.985	0.889	0.599	0	2
Trh	0	161.703	0.276	0.051	0	2
Gal	0	142.641	0.338	0.027	0	2
Gaa	0	124.33	0.917	0.768	0	2
Ddc	0	92.6612	0.359	0.088	0	2
Th	0	84.0045	0.187	0.021	0	2
Ndn	0	67.04	0.933	0.789	0	2
Nap1l5	0	62.5477	0.962	0.854	0	2
Scg2	0	58.1066	0.878	0.654	0	2
Gprasp2	0	56.0869	0.844	0.62	0	2
Dlk1	0	48.017	0.568	0.104	0	2
Vat1	0	46.8396	0.649	0.286	0	2
Hap1	0	41.6201	0.861	0.558	0	2
Otp	0	38.1299	0.304	0.015	0	2
Nrsn2	0	35.345	0.811	0.583	0	2
Tmem130	0	34.9534	0.879	0.634	0	2
Sparc	0	31.9639	0.935	0.783	0	2
Wdr6	0	31.9032	0.834	0.601	0	2
Slc30a3	0	31.6735	0.642	0.318	0	3
Hpcal1	0	12.1813	0.726	0.386	0	3
Camk2d	0	11.7183	0.844	0.56	0	3
Kcng1	0	8.54679	0.405	0.132	0	3
Acvr2a	0	8.03781	0.643	0.296	0	3
Trhr	0	5.9604	0.325	0.068	0	3
Atp2b4	0	3.17931	0.836	0.502	0	3
Arhgap6	0	1.7009	0.353	0.091	0	3
Ly6h	0	0.449671	0.887	0.731	0	3
Col23a1	4.32952e-304	0.366527	0.261	0.06	6.33408e-300	3
Cpne7	2.42267e-281	66.8398	0.661	0.365	3.54437e-277	3
Otof	1.30929e-279	1.42319	0.259	0.063	1.91549e-275	3
Nr2f2	1.76753e-266	1.67065	0.662	0.357	2.5859e-262	3
Plxnd1	3.67731e-234	7.32923	0.428	0.18	5.37991e-230	3
Unc5d	3.04687e-231	3.95103	0.54	0.261	4.45757e-227	3
Filip1	1.4627e-213	1.77534	0.255	0.075	2.13993e-209	3
Ctxn1	1.5971e-210	4.20348	0.878	0.704	2.33656e-206	3
Ptpn14	1.63828e-208	0.405032	0.22	0.058	2.39681e-204	3
Kcnip2	5.63772e-207	13.4221	0.723	0.45	8.24799e-203	3
Ptpro	2.79027e-206	1.4615	0.446	0.199	4.08217e-202	3
Mobp	0	60.1776	0.992	0.799	0	4
Cldn11	0	49.8913	0.917	0.544	0	4
Cnp	0	45.2343	0.912	0.651	0	4
Car2	0	35.2103	0.93	0.742	0	4
Mag	0	34.7701	0.878	0.512	0	4
Mbp	0	32.3285	1	0.946	0	4
Mal	0	30.8858	0.919	0.573	0	4
Trf	0	26.5579	0.908	0.544	0	4
Cryab	0	24.4883	0.856	0.608	0	4
Ugt8a	0	16.7665	0.781	0.384	0	4
Qdpr	0	16.6627	0.903	0.745	0	4
Ttyh2	0	15.6177	0.603	0.282	0	4
Fa2h	0	13.5357	0.726	0.295	0	4
2022-09-04	0	12.4721	0.81	0.56	0	4
Mog	0	11.9451	0.768	0.352	0	4
Aspa	0	10.8515	0.544	0.193	0	4
Pllp	0	10.524	0.748	0.405	0	4
Tmem88b	0	9.85415	0.735	0.341	0	4
Ermn	0	9.29952	0.789	0.353	0	4
Ppp1r14a	0	7.47601	0.685	0.323	0	4
Prkcd	0	418.715	0.913	0.171	0	5
Pcp4	0	247.42	0.989	0.861	0	5
Pdp1	0	210.825	0.916	0.536	0	5
Rora	0	172.403	0.891	0.436	0	5
Ptpn4	0	124.893	0.876	0.453	0	5
Cit	0	121.341	0.86	0.471	0	5
Adarb1	0	113.034	0.939	0.548	0	5
Nsmf	0	86.8073	0.96	0.759	0	5
Tcf7l2	0	85.8377	0.92	0.29	0	5
Nrip3	0	80.092	0.879	0.519	0	5
Synpo2	0	76.3987	0.704	0.072	0	5
Plekhg1	0	76.1397	0.837	0.112	0	5
Amotl1	0	74.5996	0.851	0.242	0	5
Grm1	0	74.4149	0.687	0.32	0	5
Ntng1	0	74.3781	0.862	0.286	0	5
Ccdc136	0	69.9433	0.905	0.482	0	5
Elmo1	0	65.8855	0.871	0.52	0	5
Pitpnc1	0	65.3994	0.792	0.487	0	5
Ptpn3	0	64.1517	0.83	0.303	0	5
Kitl	0	62.8542	0.738	0.286	0	5
Nov	0	84.848	0.783	0.383	0	6
Man1a	0	53.8052	0.623	0.22	0	6
Plk2	0	52.9225	0.897	0.598	0	6
Itpka	0	36.9148	0.875	0.447	0	6
Atp2b1	0	34.706	0.977	0.833	0	6
Fibcd1	0	34.6262	0.668	0.137	0	6
Fam131a	0	33.8869	0.921	0.617	0	6
Pou3f1	0	30.1253	0.731	0.239	0	6
Rprml	0	19.6612	0.741	0.383	0	6
Mpped1	0	18.6791	0.872	0.441	0	6
Cpne8	0	10.861	0.487	0.151	0	6
Lmo1	0	9.3291	0.497	0.163	0	6
Lefty1	0	8.42303	0.326	0.033	0	6
Sertm1	0	8.38963	0.639	0.247	0	6
Gpr161	0	5.27574	0.636	0.143	0	6
Gm2115	0	4.86936	0.722	0.149	0	6
Iqgap2	0	4.85913	0.558	0.181	0	6
Matn2	0	4.73844	0.575	0.175	0	6
Trpc4	0	2.6581	0.434	0.125	0	6
Slc9a2	0	1.03745	0.296	0.054	0	6
Bmp3	3.38233e-100	0.782495	0.234	0.086	4.94834e-96	7
Dtl	3.19044e-48	0.343163	0.144	0.059	4.66761e-44	7
Gm19410	2.17863e-41	0.512127	0.208	0.107	3.18733e-37	7
Rai14	2.04402e-40	0.476681	0.166	0.079	2.9904e-36	7
Tmem121b	5.75109e-38	0.662196	0.359	0.229	8.41384e-34	7
Npas2	7.92889e-37	2.87618	0.32	0.202	1.16e-32	7
Sema3a	1.01953e-32	0.431354	0.212	0.117	1.49157e-28	7
Igsf21	3.26308e-31	10.2381	0.423	0.315	4.77389e-27	7
Pcsk5	3.04697e-30	0.719918	0.181	0.099	4.45772e-26	7
Prss12	2.57674e-28	1.24083	0.22	0.131	3.76977e-24	7
Grik3	2.26635e-25	8.18702	0.423	0.33	3.31567e-21	7
Vopp1	2.65225e-25	2.48493	0.506	0.397	3.88024e-21	7
Rxfp1	2.62889e-24	0.314715	0.122	0.062	3.84607e-20	7
Ext1	2.76638e-18	0.628513	0.408	0.318	4.04721e-14	7
Jcad	2.27709e-15	0.358146	0.376	0.297	3.33139e-11	7
Lypd6	7.5256e-15	0.735594	0.231	0.164	1.101e-10	7
Sobp	9.42396e-15	3.6102	0.57	0.487	1.37873e-10	7
Otud1	2.96756e-14	0.495061	0.282	0.211	4.34154e-10	7
Rasal1	3.04002e-14	1.13807	0.448	0.358	4.44755e-10	7
Chd5	4.9372e-13	1.07362	0.639	0.563	7.22312e-09	7
Ywhah	0	424.048	0.998	0.94	0	8
Cpe	0	399.005	1	0.984	0	8
Chgb	0	327.384	0.979	0.737	0	8
Hpca	0	312.961	0.997	0.739	0	8
Syn2	0	304.659	0.987	0.792	0	8
Selenow	0	279.778	0.998	0.942	0	8
Gapdh	0	230.727	0.993	0.926	0	8
Dnm1	0	216.299	0.993	0.888	0	8
Snca	0	211.972	0.984	0.747	0	8
Aldoa	0	177.347	0.999	0.961	0	8
Nptx1	0	126.782	0.964	0.623	0	8
Dynll1	0	110.984	0.991	0.906	0	8
Mmd	0	105.213	0.96	0.678	0	8
Slc17a7	0	102.11	0.992	0.731	0	8
Stmn2	0	89.601	0.984	0.834	0	8
Sv2b	0	89.137	0.956	0.665	0	8
Scn1b	0	79.3131	0.986	0.814	0	8
Cpne6	0	77.7739	0.974	0.578	0	8
Neurod6	0	77.7176	0.903	0.35	0	8
Lpl	0	56.8034	0.834	0.289	0	8
3110035E14Rik	0	36.0042	0.943	0.567	0	9
Rprm	0	33.1348	0.789	0.331	0	9
Ttc9b	0	14.7593	0.813	0.473	0	9
Ipcef1	0	12.4424	0.736	0.267	0	9
Ccl27a	0	11.7085	0.666	0.198	0	9
Garnl3	0	8.64728	0.699	0.319	0	9
Tbr1	0	8.62025	0.804	0.35	0	9
Hs3st2	0	7.06126	0.593	0.143	0	9
Igfbp6	0	5.20035	0.671	0.273	0	9
Gm11549	0	4.68447	0.566	0.134	0	9
Nxph3	0	4.21364	0.581	0.148	0	9
Myl4	0	3.75803	0.508	0.107	0	9
Arhgap25	0	3.13077	0.414	0.044	0	9
Arc	0	2.68403	0.843	0.388	0	9
Gadd45a	0	2.07829	0.525	0.137	0	9
Krt80	0	2.01744	0.196	0.014	0	9
Col5a1	0	1.66491	0.298	0.038	0	9
Myh3	0	0.839024	0.214	0.02	0	9
Gm10334	0	0.44771	0.129	0.004	0	9
Abi3bp	1.24863e-307	1.03997	0.255	0.038	1.82674e-303	9
Ndnf	3.1331e-132	12.7886	0.318	0.11	4.58373e-128	10
Slc1a3	1.04341e-113	15.6856	0.912	0.766	1.5265e-109	10
Hapln1	6.99873e-99	7.90142	0.262	0.093	1.02391e-94	10
Rgcc	6.44255e-86	1.05467	0.556	0.318	9.42545e-82	10
Scrg1	5.05532e-81	2.24921	0.54	0.314	7.39593e-77	10
Cnr1	1.05062e-80	4.30981	0.725	0.513	1.53706e-76	10
Gldc	2.14074e-71	0.602964	0.312	0.142	3.1319e-67	10
Lcat	2.86573e-68	0.953368	0.311	0.145	4.19256e-64	10
Dio2	3.32501e-68	1.02668	0.358	0.181	4.86449e-64	10
Ntsr2	7.49588e-60	2.25913	0.782	0.601	1.09665e-55	10
Oaf	1.65339e-59	0.902055	0.27	0.125	2.41891e-55	10
Sox9	4.37209e-55	1.55611	0.588	0.427	6.39637e-51	10
Npas1	3.51379e-46	0.934764	0.227	0.108	5.14068e-42	10
Slc9a3r1	1.33196e-45	0.457745	0.463	0.296	1.94866e-41	10
Reln	1.2875e-44	14.3448	0.429	0.268	1.88362e-40	10
Ppp1r3c	1.58316e-44	0.556456	0.428	0.267	2.31616e-40	10
Mertk	9.93165e-44	0.664008	0.193	0.087	1.453e-39	10
S1pr1	1.94443e-37	2.9305	0.621	0.484	2.8447e-33	10
Cldn10	3.91851e-36	0.287093	0.598	0.443	5.73277e-32	10
Slc15a2	1.64046e-34	0.599094	0.325	0.197	2.4e-30	10
Ddn	0	66.8849	0.964	0.648	0	11
Dgkh	0	64.2623	0.856	0.467	0	11
Fam163b	0	62.5264	0.825	0.358	0	11
Bhlhe22	0	60.7281	0.827	0.341	0	11
Sema5a	0	54.6267	0.777	0.308	0	11
Prox1	0	54.6053	0.765	0.199	0	11
Rfx3	0	53.2531	0.747	0.29	0	11
Pcdh20	0	46.6488	0.735	0.237	0	11
Rasl10a	0	28.5732	0.713	0.217	0	11
Dsp	0	28.5461	0.688	0.043	0	11
Npnt	0	23.7636	0.588	0.112	0	11
Lct	0	23.562	0.526	0.034	0	11
Spata13	0	19.7537	0.502	0.097	0	11
Jph1	0	19.1324	0.61	0.166	0	11
Plekha2	0	16.9574	0.653	0.13	0	11
Capn3	0	15.8758	0.468	0.061	0	11
Trpc6	0	14.2837	0.495	0.075	0	11
Slc44a5	0	13.0847	0.545	0.141	0	11
Plk5	0	12.9546	0.551	0.139	0	11
Smoc2	0	12.366	0.584	0.096	0	11
Cplx3	4.98563e-144	35.0392	0.341	0.098	7.29398e-140	12
Ctgf	1.5179e-100	61.1183	0.326	0.115	2.22068e-96	12
Ppp1r14a	9.6891e-66	0.727161	0.585	0.345	1.41752e-61	12
Plekhb1	1.18504e-52	0.873962	0.874	0.728	1.73371e-48	12
Lpar1	2.45854e-45	1.73483	0.476	0.281	3.59684e-41	12
Pla2g16	2.62872e-31	1.36556	0.575	0.413	3.84581e-27	12
Sox10	1.28572e-30	0.630126	0.423	0.266	1.88101e-26	12
Carhsp1	5.14104e-30	0.728043	0.447	0.299	7.52134e-26	12
Adamts4	5.69613e-28	0.762114	0.26	0.138	8.33344e-24	12
Galnt6	1.87424e-27	0.339764	0.22	0.109	2.74201e-23	12
Rai14	3.9641e-27	0.463699	0.176	0.081	5.79948e-23	12
Arhgap25	8.27081e-27	0.487098	0.143	0.06	1.21002e-22	12
Plin3	3.81217e-26	1.10386	0.333	0.2	5.57721e-22	12
Gadd45a	2.03957e-23	6.98259	0.263	0.152	2.9839e-19	12
Sec14l5	1.95095e-21	0.329864	0.192	0.099	2.85425e-17	12
Scara3	4.04428e-19	0.255279	0.199	0.108	5.91678e-15	12
Cdc42ep2	4.07849e-19	0.737823	0.32	0.204	5.96683e-15	12
Myrf	4.28813e-19	0.256622	0.339	0.222	6.27353e-15	12
Nmral1	4.05856e-18	0.31765	0.331	0.221	5.93767e-14	12
Hapln2	5.48378e-18	0.359978	0.205	0.116	8.02277e-14	12
Ptgds	0	Inf	0.955	0.799	0	13
Prl	0	117.428	0.387	0.045	0	13
Slc6a20a	0	69.0177	0.461	0.086	0	13
Fmod	0	49.096	0.363	0.023	0	13
Slc6a13	0	34.478	0.416	0.036	0	13
Col1a2	0	30.3614	0.54	0.073	0	13
Col1a1	0	26.4999	0.516	0.077	0	13
Aebp1	0	25.5274	0.395	0.039	0	13
Ogn	0	20.004	0.362	0.035	0	13
Gh	0	14.997	0.192	0.015	0	13
Slc22a6	0	11.6978	0.278	0.014	0	13
Gjb2	0	11.3295	0.389	0.05	0	13
Aldh1a2	0	9.83692	0.405	0.027	0	13
Slc13a4	0	9.15775	0.324	0.021	0	13
Ranbp3l	0	5.43744	0.303	0.03	0	13
Crabp2	0	4.7161	0.213	0.014	0	13
Slc6a12	0	4.71062	0.18	0.007	0	13
Itih2	0	2.06833	0.209	0.01	0	13
Asgr1	0	1.62117	0.206	0.009	0	13
Slc36a2	4.31844e-298	0.773585	0.114	0.005	6.31788e-294	13
Penk	0	77.125	0.961	0.341	0	14
Ppp1r1b	0	66.9639	0.907	0.313	0	14
Pde10a	0	49.4471	0.877	0.32	0	14
Gpr88	0	42.0422	0.883	0.197	0	14
Rgs9	0	23.7077	0.637	0.104	0	14
Adora2a	0	20.6025	0.646	0.026	0	14
Drd1	0	5.82084	0.566	0.085	0	14
Gpr6	0	3.57989	0.399	0.029	0	14
Rarb	0	2.41507	0.42	0.065	0	14
Drd2	0	2.32057	0.479	0.049	0	14
Syndig1l	0	2.19132	0.569	0.115	0	14
Obscn	0	1.39992	0.217	0.014	0	14
Sh3rf2	0	1.38741	0.228	0.006	0	14
Ido1	0	1.21277	0.293	0.009	0	14
Cd4	0	1.13002	0.191	0.004	0	14
Serpina9	0	1.09875	0.211	0.009	0	14
Adcy5	3.40393e-271	41.0115	0.875	0.49	4.97995e-267	14
Meis2	5.18341e-254	14.2502	0.708	0.267	7.58333e-250	14
Gng7	3.34972e-229	2.5837	0.774	0.364	4.90064e-225	14
Kcna5	9.87363e-214	1.02686	0.251	0.037	1.44451e-209	14
Tshz2	4.2754e-301	14.9704	0.639	0.19	6.25491e-297	15
Coro6	1.58411e-158	8.09525	0.518	0.189	2.31755e-154	15
Baiap2l1	3.55016e-154	7.5324	0.484	0.163	5.19389e-150	15
Nrep	2.30715e-139	35.2652	0.757	0.441	3.37537e-135	15
Vsig2	6.30746e-137	0.452488	0.14	0.018	9.22781e-133	15
Lamp5	3.82268e-110	37.7466	0.668	0.375	5.59258e-106	15
Stac2	1.10548e-109	12.8982	0.566	0.273	1.61732e-105	15
Amn	3.85313e-101	1.83165	0.34	0.114	5.63712e-97	15
Fezf2	2.76294e-98	1.93425	0.451	0.189	4.04218e-94	15
Satb1	7.17032e-89	14.8875	0.687	0.435	1.04902e-84	15
Etv1	5.35774e-71	54.5078	0.774	0.564	7.83838e-67	15
Tox	2.76399e-69	1.91642	0.476	0.244	4.04371e-65	15
Wnt10a	3.4101e-68	0.902748	0.192	0.054	4.98897e-64	15
Gcnt4	1.4498e-65	0.90106	0.192	0.056	2.12106e-61	15
Tekt5	4.17183e-63	1.6661	0.308	0.124	6.10339e-59	15
Tshz3	1.9263e-61	4.78577	0.433	0.218	2.81817e-57	15
1700001O22Rik	3.39541e-61	0.449624	0.159	0.043	4.96749e-57	15
Satb2	1.9878e-56	4.41704	0.376	0.172	2.90815e-52	15
Nxph3	5.82973e-53	5.08231	0.35	0.163	8.52889e-49	15
Bcl6	2.00349e-52	6.78947	0.412	0.214	2.9311e-48	15
Sostdc1	0	130.827	0.744	0.055	0	16
Gm5741	0	116.571	0.209	0.004	0	16
Kl	0	104.856	0.7	0.076	0	16
1500015O10Rik	0	101.974	0.681	0.028	0	16
Clic6	0	70.256	0.674	0.054	0	16
Lbp	0	38.914	0.568	0.018	0	16
Pcolce	0	35.8641	0.582	0.046	0	16
Chrnb4	0	32.3149	0.165	0.004	0	16
Cox8b	0	28.3936	0.527	0.014	0	16
Calml4	0	27.5677	0.568	0.016	0	16
Slc4a5	0	26.9476	0.531	0.008	0	16
Kcne2	0	26.1017	0.564	0.008	0	16
Tmem72	0	25.2423	0.531	0.009	0	16
F5	0	25.0558	0.476	0.011	0	16
Rdh5	0	24.7258	0.586	0.053	0	16
Msx1	0	24.6355	0.59	0.05	0	16
Aqp1	0	22.3732	0.491	0.008	0	16
Trpm3	0	20.8299	0.553	0.05	0	16
Kcnj13	0	19.6563	0.498	0.01	0	16
Col8a2	0	18.6382	0.564	0.021	0	16
Tmem212	0	30.9768	0.562	0.011	0	17
Ccdc153	0	22.9705	0.719	0.021	0	17
Foxj1	0	17.6192	0.636	0.045	0	17
Dynlrb2	0	16.5259	0.539	0.019	0	17
Odf3b	0	9.61228	0.41	0.018	0	17
Dnali1	0	9.58582	0.41	0.011	0	17
Enkur	0	8.23661	0.535	0.033	0	17
Dmkn	0	8.13425	0.332	0.011	0	17
Mia	0	7.59471	0.456	0.02	0	17
Ak7	0	6.73858	0.442	0.009	0	17
Cfap126	0	6.71624	0.438	0.021	0	17
Nme9	0	5.76646	0.346	0.004	0	17
Dnah10	0	5.3417	0.258	0.006	0	17
Ccdc146	0	5.31264	0.286	0.005	0	17
Krt15	0	5.25837	0.304	0.005	0	17
Stoml3	0	4.39712	0.327	0.004	0	17
Sntn	0	4.00315	0.217	0.002	0	17
Crocc2	0	3.93562	0.194	0.003	0	17
Lrrc36	0	3.61894	0.295	0.005	0	17
1700001C02Rik	0	3.25941	0.396	0.007	0	17
