# Supplementary material for: Spatially resolved multiomics on the neuronal effects induced by spaceflight
Source: Research Square preprint supplement (doi:10.21203/rs.3.rs-2865086/v1), 2023-05-31
Supplement: Supplementary file 8 [file bfc4ccc02c5ee87b0f9b5cc9.xlsx]

## Sheet: Sheet1
Supplementary Table 9: Metabolic analysis results for ST dataset. FGSEA results with adjusted p-values for spatial (ST) RR3 brain clusters.
dataset	cluster	Cluster assignment	Metabolic pathway	pval	padj	log2err	ES	NES	size	leadingEdge genes
Spatial	10	Neuronal and synaptic development in hippocampus CA1 region, stratum radiatum	Oxidative phosphorylation	4,49E-29	3,81E-27	140258871	-8668824	-30207857	82	Cox6a1,Uqcr11,Cox4i1,Cox8a,Ndufv3,Cox6b1,Ndufb9,Ndufa13,Uqcrq,Cox7a2,Cox5b,Atp5d,Ndufb7,Ndufa8,Uqcr10,Ndufb11,Ndufa3,Ndufa5,Uqcrc1,Ndufb8,Ndufa11,Atp5g1,Ndufs8,Ndufs5,Atp5j2,Atp5h,Ndufa12,Atp5e,Uqcrb,Ndufa6,Ndufs7,Uqcrh,Ndufb2,Ndufv1,Ndufs3,Ndufa2,Atp5k,Ndufa7,Cox6c,Ndufb10,Atp5g2,Ndufa4,Ndufb4,Ndufs2,Atp5c1,Ndufs4,Ndufb6,Cyc1,Ndufv2,Ndufc1,Ndufab1,Cox7c,Atp5l
Spatial	13	Neurovasculature	Oxidative phosphorylation	6,45E-29	5,48E-27	139518713	-8510434	-30638245	82	Cox6a1,Ndufv3,Uqcr11,Atp5d,Cox4i1,Atp5g1,Uqcrq,Ndufa13,Cox8a,Uqcr10,Ndufa5,Cox7a2,Ndufa11,Ndufb9,Ndufs7,Cox5b,Uqcrc1,Ndufb8,Ndufa12,Uqcrb,Ndufa8,Atp5j2,Ndufs8,Atp5h,Ndufb11,Ndufb2,Ndufa7,Ndufb7,Cox6b1,Ndufs5,Ndufa3,Ndufa6,Ndufb10,Cyc1,Ndufs3,Uqcrh,Atp5k,Cox6c,Ndufs2,Ndufa4,Ndufv1,Ndufs4,Ndufa2,Cox5a,Atp5c1,Ndufb4,Ndufv2,Atp5g2,Atp5e,Ndufc1,Ndufs6,Ndufb6,Cox7c,Ndufab1,Cox7b
Spatial	3	Axon guidance and neuronal development in piriform cortex and cortical amygdalar areas	Oxidative phosphorylation	5,21E-24	4,43E-22	127091304	-8532108	-28274231	81	Atp5d,Ndufv3,Cox4i1,Uqcr11,Uqcrq,Cox6a1,Ndufa8,Atp5h,Ndufb9,Ndufa5,Ndufs7,Uqcr10,Ndufa12,Ndufa13,Ndufb8,Atp5g1,Cox5b,Ndufb11,Uqcrb,Ndufs8,Cox7a2,Ndufb7,Ndufa11,Cox8a,Ndufb2,Cox6b1,Atp5j2,Ndufs3,Ndufa6,Uqcrc1,Ndufa3,Ndufs5,Ndufb10,Ndufs6,Atp5g2,Uqcrh,Atp5k,Ndufab1,Cox6c,Ndufc1,Ndufb6,Atp5e,Ndufs2,Ndufb4,Ndufa7,Ndufa2,Ndufv1,Ndufs4,Atp5c1,Cyc1,Cox5a
Spatial	7	Neurodavelopment and neuronal activity in auditory and entorhinal cortex	Oxidative phosphorylation	7,51E-23	6,38E-21	123789667	-8242459	-28066793	81	Ndufv3,Atp5d,Uqcr11,Uqcrq,Cox4i1,Ndufa13,Cox6a1,Ndufa11,Atp5h,Uqcr10,Ndufb2,Cox5b,Cox8a,Ndufa8,Cox6b1,Ndufs7,Atp5g1,Ndufb11,Ndufb8,Atp5j2,Ndufa5,Ndufa12,Ndufa3,Ndufs8,Uqcrc1,Ndufb9,Ndufb7,Ndufa6,Uqcrb,Ndufb10,Atp5e,Ndufs4,Ndufs3,Cox7a2,Atp5k,Ndufs5,Ndufa4,Ndufa7,Ndufb4,Ndufa2,Cyc1,Ndufc1,Uqcrh,Ndufs6,Ndufa9,Cox6c,Ndufs2,Lhpp,Ndufb6
Spatial	8	Synapses and metabolism in hippocampus CA3 region	Oxidative phosphorylation	1,57E-22	1,33E-20	122950406	-8446159	-27413858	82	Ndufv3,Cox4i1,Atp5d,Cox6a1,Ndufa8,Uqcr11,Cox5b,Cox8a,Ndufa5,Ndufb8,Atp5g1,Ndufa12,Atp5h,Uqcr10,Ndufa6,Ndufs7,Ndufb9,Cox7a2,Ndufb7,Uqcrq,Ndufb11,Ndufs8,Uqcrb,Ndufb10,Cox6b1,Ndufa11,Ndufs2,Ndufb2,Cox5a,Atp5j2,Ndufa13,Ndufa3,Uqcrh,Uqcrc1,Ndufab1,Cox6c,Atp5k,Ndufs3,Ndufs6,Ndufc1,Cox7c,Ndufs5,Ndufb4,Atp5g2,Ndufb6,Ndufa2,Lhpp,Ndufb3,Ndufa10,Ndufs4,Atp5l,Ndufa9,Cyc1,Ndufb5,Atp5a1,Ndufa7,Atp5c1,Ndufv2,Pp…
Spatial	6	Neuronal and synaptic development and signaling in hippocampus CA1 region, pyramidal layer	Oxidative phosphorylation	8,96E-22	7,61E-20	120397524	-8310536	-27483973	82	Ndufv3,Cox4i1,Uqcr11,Atp5d,Cox6a1,Cox5b,Cox8a,Uqcr10,Uqcrq,Atp5h,Cox6b1,Ndufa8,Ndufa5,Cox7a2,Ndufs7,Atp5j2,Ndufb11,Ndufb9,Ndufa12,Ndufa11,Uqcrc1,Ndufa13,Ndufb2,Uqcrb,Ndufa6,Ndufb7,Ndufb10,Ndufa3,Ndufc1,Atp5g1,Ndufb8,Uqcrh,Ndufs8,Ndufs3,Ndufa4,Ndufs6,Atp5k,Cox6c,Ndufv1,Atp5c1,Ndufs5,Ndufb6,Atp5e,Cox5a,Ndufa2,Ndufs2,Ndufb4,Atp5l,Atp5g2,Nsf,Cyc1,Lhpp,Ndufab1,Ndufs4,Atp5a1,Ndufb5,Ndufa9
Spatial	12	Nauronal and oligodendrocyte development and function in corpus callosum	Oxidative phosphorylation	1,36E-17	1,15E-15	108644054	-7485103	-27035986	82	Atp5d,Cox4i1,Ndufv3,Uqcr11,Ndufa8,Ndufs7,Uqcr10,Uqcrq,Cox6a1,Atp5g1,Ndufa13,Ndufb2,Atp5h,Ndufa12,Ndufb7,Cox5b,Ndufa5,Atp5j2,Uqcrc1,Atp5k,Ndufb11,Ndufa3,Ndufb8,Cox8a,Ndufa6,Ndufb10,Ndufb4,Ndufv1,Cox5a,Ndufs5,Ndufab1,Ndufb9,Cox6b1,Atp5e,Uqcrfs1,Ndufa11,Ndufs3,Ndufs2,Ndufa4,Ndufa2,Cox7a2,Ndufs6,Ndufc1
Spatial	15	Neurodevelopment in retrosplenial cortex	Oxidative phosphorylation	1,45E-17	1,23E-15	107686819	-7481383	-27000921	83	Uqcr10,Atp5d,Uqcr11,Ndufv3,Cox4i1,Uqcrc1,Ndufb7,Cox6a1,Uqcrq,Atp5h,Ndufa13,Ndufs7,Cox5b,Ndufa8,Ndufa11,Ndufs8,Atp5g1,Atp5j2,Ndufs2,Ndufb11,Ndufv1,Ndufb2,Atp5e,Ndufc1,Ndufs6,Cox7a2,Ndufa5,Uqcrb,Atp5k,Ndufa2,Ndufs3,Ndufb8,Atp5g2,Ndufa6,Ndufb9,Ndufa10,Cox8a,Ndufa12,Ndufa7,Ndufb10,Ndufa3,Ndufab1
Spatial	2	Neuroendocrine functions and dopaminergic neurogenesis in hypothalamus and pituitary	Oxidative phosphorylation	1,20E-16	1,02E-14	104762649	-7855289	-26341591	82	Ndufv3,Uqcrb,Ndufa5,Ndufa6,Uqcr11,Uqcrq,Atp5g1,Atp5d,Ndufb11,Cox6a1,Cox5a,Ndufa8,Uqcr10,Cox4i1,Ndufa12,Ndufb8,Cox8a,Ndufa11,Ndufb2,Ndufs7,Atp5j2,Atp5h,Cox5b,Ndufb7,Cox7a2,Cox6b1,Ndufb10,Ndufb4,Ndufb9,Ndufs6,Ndufa3,Ndufc1,Ndufa13,Cox6c,Ndufs8,Ndufs3,Atp5l,Ndufs4,Ndufc2,Ndufb6,Cox7c,Ndufab1,Atp5c1,Ndufa4,Ndufs2,Ndufa7,Uqcrh,Atp5k,Ndufs5,Uqcrc1
Spatial	17	Transport, motility and cytoskeleton in choroid plexus	Oxidative phosphorylation	6,37E-13	5,41E-11	921426	-695319	-24936237	83	Ndufv3,Atp5d,Uqcrq,Ndufa11,Ndufs8,Uqcrc1,Ndufa13,Ndufb2,Atp5g1,Uqcr10,Ndufs2,Ndufa12,Ndufs7,Cox4i1,Ndufb8,Ndufa8,Ndufc1,Uqcrb,Cox5b,Ndufb11,Atp5h,Ndufa6,Cox6a1,Uqcr11,Cox5a,Ndufs6,Ndufab1,Ndufc2,Ndufs4,Atp5j2,Ndufa9,Ndufa2,Ndufb7,Ndufb9,Ndufa5,Cox6b1,Ndufb10,Ndufs3,Ndufb5,Cox8a,Ndufb4,Ndufs5,Ppa2,Lhpp,Atp5c1
Spatial	5	Oxidative stress and neuronal development and functions in thalamus	Oxidative phosphorylation	3,30E-12	2,81E-10	89867123	-7253541	-24280382	83	Ndufv3,Atp5h,Cox4i1,Atp5d,Ndufa5,Uqcrq,Cox6a1,Cox5b,Ndufb2,Uqcr11,Atp5j2,Atp5g1,Uqcrb,Ndufa8,Uqcr10,Ndufs7,Cox5a,Ndufb11,Ndufb7,Cox8a,Ndufa6,Ndufb8,Ndufs3,Ndufb10,Ndufa13,Cox7a2,Ndufa11,Ndufa12,Ndufs8,Uqcrc1,Atp5k,Ndufa4,Ndufs6,Ndufb6,Ndufs2,Ndufb9,Ndufb4,Ndufs5,Ndufv1,Cox6b1,Lhpp,Ndufa3,Cox6c,Cox6a2
Spatial	0	GABAergic synapses, neurodevelopment in mid brain	Oxidative phosphorylation	6,70E-11	5,69E-09	83908894	-7039188	-23581639	82	Ndufv3,Atp5d,Cox4i1,Ndufs7,Ndufa8,Uqcr10,Uqcr11,Ndufa5,Atp5h,Ndufa6,Cox5b,Atp5g1,Ndufa12,Ndufb7,Ndufa13,Uqcrb,Ndufa11,Cox6a1,Ndufb9,Ndufb8,Ndufb2,Ndufb11,Ndufs2,Cox7a2,Ndufb10,Atp5j2,Uqcrq,Cox8a,Ndufs8,Ndufs3,Ndufs5,Uqcrc1,Ndufb4,Ndufs6,Ndufv1,Atp5g2,Atp5k,Ndufa2,Cox6c,Ndufa3,Cox5a,Ndufc1,Cox6b1,Ppa2,Ndufab1,Nsf,Ndufs4
Spatial	1	Neuronal projection development, K channels in somatosensory, motor, visual cortex	Oxidative phosphorylation	2,28E-08	1,94E-06	73376199	-6476536	-21773641	82	Ndufv3,Uqcrq,Atp5d,Cox4i1,Ndufb7,Atp5h,Uqcr10,Ndufb2,Ndufa5,Ndufs7,Uqcrc1,Cox6a1,Atp5j2,Uqcr11,Cox5b,Atp5g1,Ndufa13,Ndufa11,Ndufs8,Ndufb11,Ndufa8,Ndufs3,Atp5k,Ndufv1,Ndufa3,Ndufb8,Cox6b1,Uqcrb,Ndufb9,Ndufb10,Ndufa2,Atp5e,Cox7a2,Cox8a
Spatial	9	Axon guidance and cell migration in somatosensory, motor, visual cortex	Oxidative phosphorylation	3,99E-08	3,39E-06	71951283	-6215473	-21356198	83	Atp5d,Cox4i1,Ndufv3,Ndufa8,Uqcr10,Ndufb7,Uqcr11,Uqcrq,Ndufb2,Ndufa11,Ndufs7,Atp5h,Ndufa6,Uqcrc1,Ndufs3,Cox5b,Ndufb11,Ndufa13,Ndufa12,Atp5j2,Ndufs6,Cox6a1,Cox6b1,Ndufb8,Ndufs8,Ndufb10,Ndufa5,Cox8a,Atp5g1,Ndufs2,Cox5a,Ndufb9,Ndufv1,Ndufa2
Spatial	4	Myalination in white matter	Oxidative phosphorylation	1,75E-07	1,48E-05	69013246	-5997868	-2182912	82	Ndufv3,Atp5d,Ndufa8,Uqcr10,Ndufb11,Cox4i1,Uqcr11,Uqcrq,Cox6a1,Ndufb8,Ndufs7,Ndufa5,Ndufa11,Uqcrb,Cox5b,Uqcrc1,Ndufs8,Ndufb7,Cox8a,Atp5h,Ndufa6,Ndufb9,Ndufb2,Ndufa13,Atp5g1,Ndufa3,Ndufv1,Cox6b1,Cox7a2,Ndufs3,Ndufs2,Ndufa12,Atp5j2,Ndufc1,Ndufab1,Cox7a2l,Ndufb10,Cox5a
Spatial	12	Nauronal and oligodendrocyte development and function in corpus callosum	Glycolysis/gluconeogenesis	1,37E-06	5,82E-05	64355184	-7360466	-22281462	32	Gapdh,Eno1,Eno2,Pkm,Gpi1,Pck2,Ldhb,Pgam1,Gm3839,Rwdd2a,Bpgm,G6pc3,Tpi1
Spatial	15	Neurodevelopment in retrosplenial cortex	Fructose and mannose metabolism	5,00E-06	21244	61052688	-7583218	-21547445	25	Aldoa,Pmm1,Pfkl,Pfkm,Pfkp,Gmppa,Aldoc,Pgm2l1,Gmppb,Mpi,Akr7a5,Khk,Sord
Spatial	8	Synapses and metabolism in hippocampus CA3 region	Glycolysis/gluconeogenesis	8,43E-06	35816	59332548	-7557113	-20747076	32	Gapdh,Eno1,Pkm,Gpi1,Eno2,Tpi1,Pck2,Gm3839,Pgam1,G6pc3,Pdhb,Ldhb,Bpgm
Spatial	6	Neuronal and synaptic development and signaling in hippocampus CA1 region, pyramidal layer	Glycolysis/gluconeogenesis	1,31E-05	55492	59332548	-73283	-20437044	32	Gapdh,Eno1,Pkm,Eno2,Gpi1,Tpi1,Gm3839,Ldha,G6pc3,Pgam1,Pck2,Rwdd2a,Ldhb
Spatial	13	Neurovasculature	Fructose and mannose metabolism	2,29E-05	97423	57561026	-7486301	-20879531	23	Aldoa,Aldoc,Pmm1,Akr7a5,Gmppa,Akr1b3,Pfkl,Pmm2,Gmppb,Pgm2,Pfkp
Spatial	3	Axon guidance and neuronal development in piriform cortex and cortical amygdalar areas	Glycolysis/gluconeogenesis	2,46E-05	104741	57561026	-7234371	-20156818	32	Gapdh,Eno1,Pkm,Tpi1,Gpi1,Eno2,Pgam1,Gm3839,G6pc3,Ldhb,Ldha,Pck2,Pgam2
Spatial	10	Neuronal and synaptic development in hippocampus CA1 region, stratum radiatum	Glycolysis/gluconeogenesis	2,88E-05	122507	57561026	-7189771	-20757802	31	Gapdh,Eno1,Tpi1,Pkm,Gpi1,Eno2,G6pc3,Pgam1,Ldhb,Gm3839,Pck2,Pgk1,Ldha
Spatial	13	Neurovasculature	Glycolysis/gluconeogenesis	5,47E-05	154898	55733224	-6877612	-20529739	31	Gapdh,Eno1,Pkm,Gpi1,Eno2,Tpi1,Pck2,Pgam1,Ldhb,G6pc3
Spatial	17	Transport, motility and cytoskeleton in choroid plexus	Glycolysis/gluconeogenesis	3,76E-05	159607	55733224	-6926225	-20452463	31	Gapdh,Eno1,Pkm,Eno2,Gpi1,Pgam1,Tpi1,G6pc3,Rwdd2a
Spatial	11	Cell development and migration in dentate gyrus	Fructose and mannose metabolism	4,15E-05	352833	55733224	-7372125	-20325648	25	Aldoc,Pgm2l1,Pmm1,Pgm2,Akr1a1,Pfkp,Pfkm,Aldoa,Pfkfb2,Mpi,Akr7a5
Spatial	7	Neurodavelopment and neuronal activity in auditory and entorhinal cortex	Glycolysis/gluconeogenesis	1685	716124	51884808	-6792699	-19395901	32	Gapdh,Eno1,Pkm,Eno2,Gpi1,Tpi1,G6pc3,Gm3839
Spatial	16	Neurons and glia around ventricles and in choroid plexus	Fructose and mannose metabolism	1317	1119424	51884808	-7102933	-18808927	25	Aldoc,Aldoa,Pmm1,Pfkm,Pfkl,Mpi,Pfkp,Gmppa,Pfkfb3,Akr7a5
Spatial	6	Neuronal and synaptic development and signaling in hippocampus CA1 region, pyramidal layer	Fructose and mannose metabolism	39751	1126269	49849311	-7268704	-18972388	24	Aldoa,Aldoc,Pmm1,Mpi,Pfkm,Pgm2l1,Akr1a1,Pfkl,Akr7a5,Pfkp,Akr1b3,Pgm2,Gmppb,Gmppa,Pfkfb2
Spatial	15	Neurodevelopment in retrosplenial cortex	Glycolysis/gluconeogenesis	4618	1308422	49849311	-6188726	-1865527	32	Gapdh,Eno1,Gpi1,Pkm,Eno2,G6pc3,Tpi1,Gm3839,Acss2,Acss1,Acyp1,Eno3,Ldha,Pck2
Spatial	3	Axon guidance and neuronal development in piriform cortex and cortical amygdalar areas	Fructose and mannose metabolism	50044	1417923	47727082	-7216567	-18914544	24	Aldoa,Aldoc,Pmm1,Pfkm,Mpi,Pfkl,Pfkp,Gmppa,Akr1a1,Akr1b3,Pfkfb4,Akr7a5,Pgm2
Spatial	2	Neuroendocrine functions and dopaminergic neurogenesis in hypothalamus and pituitary	Transport extracellular	60018	255076	47727082	48419241	165040991	163	Slc6a3,Slc18a2,Atp1a3,Atp2b1,Atp2b4,Slc32a1,Atp1a2,Slc5a7,Slc17a7,Atp2b2,Atp1b1,Slco3a1,Slc8a2,Slc1a3,Slc1a2,Scarb2,Atp8b2,Slc2a3,Slc2a13,Slc38a2,Tpp1,Slc36a1,Slc1a1,Slc38a1,Slc12a5,Aqp4,Slc4a10,Gltp
Spatial	10	Neuronal and synaptic development in hippocampus CA1 region, stratum radiatum	Arachidonic acid metabolism	172098	365708	45505987	-775644	-18530033	14	Gpx4,Cbr1,Gpx1,Ephx2
Spatial	10	Neuronal and synaptic development in hippocampus CA1 region, stratum radiatum	Fructose and mannose metabolism	135867	365708	45505987	-6832314	-18434072	23	Aldoc,Pmm1,Aldoa,Pfkl,Mpi,Akr7a5,Pfkm,Gmppa,Gmppb,Akr1b3
Spatial	0	GABAergic synapses, neurodevelopment in mid brain	Fructose and mannose metabolism	91407	3884813	47727082	-6958795	-18296232	23	Aldoa,Pmm1,Aldoc,Gmppa,Pfkl,Pfkp,Pfkfb4,Pfkm,Khk,Mpi,Pgm2l1,Gmppb,Akr7a5,Pmm2
Spatial	1	Neuronal projection development, K channels in somatosensory, motor, visual cortex	Glycolysis/gluconeogenesis	93431	3970818	47727082	-6469381	-18396975	32	Gapdh,Eno1,Pkm,Eno2,Gpi1,G6pc3,Pck2,Tpi1,Gm3839,Ldha
Spatial	9	Axon guidance and cell migration in somatosensory, motor, visual cortex	Glycolysis/gluconeogenesis	111199	4725942	45505987	-6320598	-18176555	32	Gapdh,Eno1,Pkm,Gpi1,Eno2,Gm3839,Tpi1,G6pc3,Pgam1,Bpgm,Ldha,Rwdd2a,Pdhb,Pck2,Ldhb,Pgam2
Spatial	11	Cell development and migration in dentate gyrus	Glycolysis/gluconeogenesis	111537	4740318	45505987	-6144701	-17978298	32	Gapdh,Eno1,Pdhb,Gm3839,Gpi1,Acss2,G6pc3,Pgk1,Acss1,Ldhb,Pdha1,Pgm1,Ldha,Tpi1,Pck2,Pgam1
Spatial	9	Axon guidance and cell migration in somatosensory, motor, visual cortex	Arachidonic acid metabolism	172469	4886609	45505987	-7865121	-17965263	12	Cbr1,Gpx4,Ephx2,Aloxe3
Spatial	11	Cell development and migration in dentate gyrus	Triacylglycerol synthesis	176909	5012426	45505987	88560951	173888445	7	Dgat2,Mgll
Spatial	16	Neurons and glia around ventricles and in choroid plexus	CoA synthesis	123788	5260998	45505987	79129579	189675087	11	Enpp2,Pank3
Spatial	5	Oxidative stress and neuronal development and functions in thalamus	Miscellaneous	136495	5801036	45505987	-6659714	-18152232	28	Ftl1,Fth1,Car7,Cyb5r3,Cnp,Bckdha,Bckdhb
Spatial	2	Neuroendocrine functions and dopaminergic neurogenesis in hypothalamus and pituitary	Fatty acid synthesis	305423	6490231	4317077	-7209172	-18364836	20	Fasn,Tecr,Fads1,Tbcb,Fads3,Scd2,Hacd1,Scd1
Spatial	2	Neuroendocrine functions and dopaminergic neurogenesis in hypothalamus and pituitary	Glycolysis/gluconeogenesis	233932	6490231	4317077	-6393269	-1807854	32	Gapdh,Eno1,Pkm,Rwdd2a,Gpi1,Gm3839,Ldha,G6pc3,Pck2,Eno2
Spatial	4	Myalination in white matter	Glycolysis/gluconeogenesis	154019	654581	45505987	-6104256	-1836699	31	Gapdh,Eno1,Pkm,Bpgm,Gpi1,Eno2,Cat,Tpi1,G6pc3,Gm3839
Spatial	16	Neurons and glia around ventricles and in choroid plexus	ROS detoxification	231716	656529	4317077	96483191	160791504	3	Sod3,Sod2,Sod1
Spatial	9	Axon guidance and cell migration in somatosensory, motor, visual cortex	Fructose and mannose metabolism	339121	7206327	4317077	-6614518	-17796682	23	Pmm1,Aldoa,Aldoc,Akr7a5,Gmppa,Pfkl,Pfkm,Mpi,Pmm2,Pfkp
Spatial	1	Neuronal projection development, K channels in somatosensory, motor, visual cortex	Fructose and mannose metabolism	359798	7645717	4317077	-6589082	-17683697	24	Aldoa,Pmm1,Aldoc,Mpi,Pfkm,Pfkp,Gmppa,Pfkl,Akr7a5,Pfkfb4,Khk,Gmppb,Pmm2
Spatial	1	Neuronal projection development, K channels in somatosensory, motor, visual cortex	Pyrimidine synthesis	344504	7645717	4317077	86224158	168741941	7	Fam20b,Fn3krp,Nol9
Spatial	13	Neurovasculature	Miscellaneous	396825	843254	34452129	-5877963	-17268765	29	Ftl1,Fth1,Cnp,Tmem91,Bckdha
Spatial	16	Neurons and glia around ventricles and in choroid plexus	Chondroitin sulfate degradation	540541	8433735	32635161	75655828	181348441	11	Glb1,Arsg,Arsb,Neu1,Ids
Spatial	16	Neurons and glia around ventricles and in choroid plexus	Glycolysis/gluconeogenesis	595322	8433735	22347912	-5869525	-16294264	32	Gapdh,Eno1,Eno2,Pkm,Tpi1,Pck2,Gpi1,Dlat,Pdhb,Pgam1
Spatial	16	Neurons and glia around ventricles and in choroid plexus	Oxidative phosphorylation	53993	8433735	22082346	-4731029	-15278812	83	Ndufs7,Ndufa5,Cox6a1,Ndufb2,Atp5k,Ndufa8,Ndufb8,Uqcrq,Uqcr10,Ndufb4,Ndufa12,Atp5d,Ndufv3,Nsf,Uqcrc1,Cox4i1,Ndufa6,Ndufs4,Ndufs2,Atp5j2,Cox7a2,Ndufv1,Cox5b,Uqcr11,Ndufa10,Ndufb9,Cox8a,Ndufs3,Ndufc2,Ndufs1,Ndufa3
Spatial	0	GABAergic synapses, neurodevelopment in mid brain	Citric acid cycle	314317	8905656	4317077	64479479	173781598	26	Sdhc,Cs,Aco2,Acly,Mdh2,Sdhd,Dld,Ogdhl,Fh1,Idh1,Ireb2,Sdha,Pdhx,Mdh1
Spatial	4	Myalination in white matter	Miscellaneous	339841	9628817	4317077	-5960253	-17677871	29	Ftl1,Fth1,Cnp,Cyb5r3
Spatial	8	Synapses and metabolism in hippocampus CA3 region	Miscellaneous	341788	9683995	4317077	-6325101	-16934516	28	Ftl1,Fth1,Cyb5r3,Bckdhb,Car4,Cnp,Bckdha,Car7
Spatial	1	Neuronal projection development, K channels in somatosensory, motor, visual cortex	Miscellaneous	579652	9854088	26984231	-6133559	-16861549	27	Ftl1,Fth1,Tmem91,Cyb5r3,Bckdha,Cnp,Car7
