# Supplementary material for: Spatially resolved multiomics on the neuronal effects induced by spaceflight
Source: Research Square preprint supplement (doi:10.21203/rs.3.rs-2865086/v1), 2023-05-31
Supplement: Supplementary file 9 [file dc377b09859eda49f6309d8c.xlsx]

## Sheet: Sheet1
Supplementary Table 1: Multiomics cluster marker genes. Marker genes identified for each of the 18 clusters identified in the multiomics clusters of RR3 brain data.
gene	p_val	avg_log2FC	pct.1	pct.2	p_val_adj	cluster
Kcnd2	0	1.99260824547909	0.998	0.789	0	0
Chn2	0	1.69313077700034	0.886	0.203	0	0
Olfm3	0	1.66766035021365	0.904	0.296	0	0
Tenm1	0	1.45907519084143	0.953	0.474	0	0
Fgf14	0	1.41488871593242	1	0.869	0	0
Cadps2	0	1.40099778742539	0.852	0.24	0	0
Galnt13	0	1.35156007747765	0.926	0.526	0	0
Kcnip4	0	1.27171812202028	0.953	0.751	0	0
Camk4	0	1.26746182309888	0.781	0.268	0	0
Lhfp	0	1.236117152077	0.781	0.223	0	0
Mctp1	0	1.22714324391513	0.837	0.344	0	0
Ralyl	0	1.21030554481437	0.985	0.695	0	0
Caln1	0	1.19648973142307	0.824	0.331	0	0
Astn2	0	1.18151250668627	0.94	0.569	0	0
Dpp6	0	1.15299307497089	0.913	0.677	0	0
Grik2	0	1.14933273924547	0.993	0.791	0	0
Zfp385b	0	1.14105578863844	0.857	0.393	0	0
Gabra6	0	1.07381217806884	0.618	0.065	0	0
Reln	0	1.07332410814288	0.74	0.152	0	0
Syne1	0	1.05968631963921	0.968	0.721	0	0
Etv1	0	1.05680581038205	0.654	0.142	0	0
Car10	0	1.04398825558472	0.955	0.552	0	0
Rims1	0	1.00550195483828	0.973	0.731	0	0
Rbfox1	0	0.990481592801424	0.983	0.807	0	0
Rbfox3	0	0.988474352357996	0.779	0.367	0	0
Unc13c	0	0.983215351031956	0.773	0.264	0	0
Negr1	0	0.970556849908521	0.991	0.819	0	0
Pde10a	0	0.96348267741851	0.912	0.597	0	0
Sphkap	0	0.928425451655681	0.668	0.238	0	0
Ablim1	0	0.911778224625838	0.715	0.316	0	0
Trhde	0	0.895936633645056	0.655	0.234	0	0
Cntn6	0	0.889020114003285	0.676	0.277	0	0
Lin7a	0	0.886432205871215	0.628	0.21	0	0
Sh3gl2	0	0.886064558050252	0.743	0.39	0	0
Chd7	0	0.870754478699889	0.649	0.192	0	0
Kctd8	0	0.854305560061494	0.638	0.251	0	0
Ror1	0	0.844266929864166	0.487	0.097	0	0
Zfp521	0	0.833312284980011	0.631	0.201	0	0
Usp3	0	0.813045728875988	0.569	0.167	0	0
Plcxd3	0	0.80821541307615	0.545	0.188	0	0
Scn2a	0	0.802584099830587	0.781	0.465	0	0
Lrrtm3	0	0.802582956642581	0.736	0.435	0	0
Tmem108	0	0.791536614166842	0.686	0.317	0	0
Rims2	0	0.790001618229396	0.964	0.789	0	0
Msra	0	0.772554977514999	0.7	0.341	0	0
Pld5	0	0.771460233703729	0.569	0.158	0	0
Erc1	0	0.760605153750167	0.643	0.304	0	0
Stxbp5l	0	0.731701512970772	0.845	0.554	0	0
Plcb4	0	0.728272608598606	0.697	0.357	0	0
Pde1c	0	0.718813077939234	0.458	0.124	0	0
Cdh18	0	0.714243951316725	0.88	0.437	0	0
Ndst3	0	0.700976362393649	0.56	0.195	0	0
Epb41	0	0.679132478819693	0.601	0.255	0	0
Cacna1a	0	0.67173639872905	0.831	0.569	0	0
Grm1	0	0.664905921247005	0.686	0.339	0	0
Gm2694	0	0.661863480530976	0.427	0.052	0	0
Ntrk3	0	0.661307003693892	0.745	0.472	0	0
Adcy1	0	0.658953056389199	0.519	0.179	0	0
Specc1	0	0.657760797902638	0.662	0.366	0	0
Stmn2	0	0.635794408840521	0.493	0.185	0	0
Tll1	0	0.628625180980031	0.399	0.08	0	0
Patj	0	0.625517291181318	0.458	0.147	0	0
Fut8	0	0.604956959467726	0.608	0.341	0	0
Cacnb4	0	0.593799076544691	0.748	0.481	0	0
Btg1	0	0.591686778570961	0.423	0.092	0	0
Snap25	0	0.590097884656934	0.806	0.556	0	0
Fat2	0	0.586915579676506	0.389	0.036	0	0
Nedd4l	0	0.584791175912361	0.628	0.374	0	0
Megf11	0	0.567110269118539	0.456	0.141	0	0
Grm4	0	0.560737669741881	0.376	0.06	0	0
Dpf3	0	0.553295242235075	0.451	0.14	0	0
Pan3	0	0.55258344386286	0.61	0.388	0	0
Als2	0	0.551125759000184	0.415	0.123	0	0
Kcnj3	0	0.548129135966285	0.657	0.443	0	0
Gabrb2	0	0.539761677152499	0.637	0.382	0	0
Smg1	0	0.539385643288208	0.641	0.414	0	0
Mtcl1	0	0.537149918533677	0.456	0.18	0	0
Ptprr	0	0.536168560870113	0.456	0.203	0	0
Kcnk10	0	0.535512538348884	0.392	0.112	0	0
Pclo	0	0.529200118963434	0.785	0.605	0	0
Tmem163	0	0.526789985443937	0.372	0.103	0	0
Il16	0	0.522688824370235	0.336	0.029	0	0
Nrxn1	0	0.506875048376594	1	0.871	0	0
Wscd2	0	0.505935250670651	0.377	0.112	0	0
Airn	0	0.497165137345987	0.355	0.114	0	0
Nrg2	0	0.492732718003723	0.504	0.269	0	0
Kcnc1	0	0.492014241005819	0.435	0.17	0	0
Lpp	0	0.481086166338269	0.474	0.223	0	0
Ank1	0	0.477943378592976	0.437	0.189	0	0
Cnksr2	0	0.476426078866824	0.752	0.456	0	0
Nhsl2	0	0.473852914532433	0.389	0.156	0	0
Tmem266	0	0.468889703718357	0.323	0.056	0	0
Pkib	0	0.459817425168978	0.295	0.052	0	0
Trmt9b	0	0.444151888485349	0.336	0.083	0	0
Zic1	0	0.442575544102873	0.335	0.069	0	0
Cnksr3	0	0.436323941909323	0.315	0.055	0	0
Oxr1	0	0.435173344718374	0.853	0.668	0	0
Zfpm2	0	0.429407890414574	0.705	0.389	0	0
Cadm3	0	0.425751587057417	0.351	0.111	0	0
Sv2b	0	0.425116597154187	0.44	0.2	0	0
Meis1	0	0.424359773167839	0.378	0.141	0	0
Adamts18	0	0.421000628176475	0.278	0.051	0	0
Gm42912	0	0.402251269412342	0.267	0.024	0	0
Exph5	0	0.399805889048579	0.274	0.051	0	0
Dock4	0	0.399507877913488	0.792	0.567	0	0
Tmem178	0	0.389960777497529	0.362	0.144	0	0
Cnpy1	0	0.381788488840308	0.31	0.073	0	0
Kirrel3	0	0.373667316222326	0.898	0.624	0	0
Neurod1	0	0.368344366828181	0.254	0.032	0	0
Grin2c	0	0.360529305147496	0.27	0.044	0	0
Nrep	0	0.354340789623124	0.26	0.067	0	0
Brinp1	9.89090221405425e-307	0.485055545115315	0.623	0.382	1.99905024648251e-302	0
Maml3	2.03694545582864e-306	0.47600628806429	0.496	0.262	4.11687046077527e-302	0
Otud7a	9.65517071029157e-303	0.504399891000544	0.731	0.558	1.95140655225703e-298	0
Snrk	5.65608918197705e-302	0.351121281684058	0.299	0.1	1.14315218456938e-297	0
Mmp24	2.0478491425506e-297	0.328383608819165	0.262	0.077	4.13890790200902e-293	0
Camk2d	6.48258333394494e-296	0.481041156794705	0.624	0.401	1.31019491762361e-291	0
Kcnc3	1.53748010217049e-289	0.3644615950495	0.321	0.121	3.10740103449678e-285	0
Cdh7	7.98066509566309e-286	0.398058360342134	0.366	0.154	1.61297222248447e-281	0
Xkr6	1.19202200897325e-282	0.496360455714318	0.584	0.38	2.40919568233583e-278	0
Rif1	1.75386875786333e-281	0.42318424648068	0.386	0.178	3.54474414651758e-277	0
Pde4d	3.47246806742597e-278	0.410319073307901	0.918	0.8	7.01820521107463e-274	0
Epha3	1.26499042244201e-275	0.374978998904653	0.377	0.163	2.55667214279754e-271	0
Nmnat2	1.60677548280493e-273	0.463329693868622	0.504	0.294	3.24745392829704e-269	0
Kif26b	6.96572259570562e-273	0.40273337675858	0.365	0.16	1.40784219381806e-268	0
Atp1a1	5.09131635294483e-270	0.36542569403522	0.347	0.147	1.02900594809368e-265	0
Gpr158	2.99248904696604e-269	0.444593455802703	0.709	0.508	6.04811961282307e-265	0
Pik3r3	3.90572895486335e-267	0.431159086031966	0.411	0.205	7.89386879067432e-263	0
Srgap2	1.93938286047232e-266	0.400926355597794	0.577	0.37	3.91968669930061e-262	0
Rapgef4	5.11690685517931e-262	0.439289389855396	0.597	0.384	1.03417804450029e-257	0
Arhgap26	4.05427345292115e-261	0.471506903326686	0.554	0.353	8.19409207569895e-257	0
Pcca	5.09452032231342e-261	0.480190465520293	0.522	0.324	1.02965350234277e-256	0
Pip5k1b	4.41561513849761e-258	0.368568701346769	0.404	0.194	8.92439975641753e-254	0
Nxn	4.1170548508982e-255	0.323232780393713	0.277	0.096	8.32097955915035e-251	0
Dock9	8.45066024344454e-253	0.413651262788897	0.549	0.342	1.70796294180258e-248	0
Ndrg3	2.10707997634955e-249	0.39041047183112	0.405	0.208	4.25861934020008e-245	0
Mir124a-1hg	9.19621273972343e-248	0.388102593543445	0.487	0.282	1.8586465568255e-243	0
Asph	1.07112753042998e-247	0.394004365954333	0.431	0.23	2.16485585175204e-243	0
Sel1l3	8.76337246129118e-247	0.3520126250363	0.338	0.148	1.77116520815156e-242	0
Ablim3	1.12129092385141e-244	0.327887392423588	0.284	0.108	2.26624108619609e-240	0
Slit3	2.04176722882932e-244	0.364164974172071	0.505	0.27	4.12661574618694e-240	0
Ryr2	7.67183511057056e-242	0.369897821252552	0.773	0.551	1.55055459419742e-237	0
St8sia5	1.11825830952772e-240	0.309884939027936	0.284	0.108	2.26011186938648e-236	0
Syt2	5.55653076973651e-236	0.308844928586341	0.264	0.094	1.12303043387145e-231	0
Susd6	3.12397050696703e-233	0.364116526397216	0.378	0.188	6.31385679163106e-229	0
Alms1	7.53237228670771e-231	0.342943852218833	0.323	0.143	1.5223677628665e-226	0
Tmtc2	3.58050396875835e-227	0.393750321822502	0.496	0.289	7.2365565712575e-223	0
Zbtb20	4.80484063460354e-222	0.34238775114335	0.847	0.653	9.71106340659722e-218	0
Bsn	1.20825605035856e-218	0.353126147000392	0.388	0.203	2.44200630337969e-214	0
Appl2	3.58049214234288e-216	0.313702411092605	0.426	0.224	7.2365326688892e-212	0
Gramd1b	5.79685469710431e-215	0.387224118309066	0.476	0.292	1.17160230283175e-210	0
Peak1	7.08861239070682e-215	0.366741266325995	0.374	0.191	1.43267945028576e-210	0
Tmem132a	2.26200894325757e-214	0.306875712689442	0.314	0.14	4.57174627521787e-210	0
Cnr1	2.67621329353516e-214	0.297958719094663	0.272	0.108	5.40889468756391e-210	0
Ddx5	1.66259873949504e-212	0.390488561199445	0.694	0.538	3.36027831239342e-208	0
Nfib	2.22892393151486e-211	0.326053715395779	0.663	0.434	4.50487815798468e-207	0
Epb41l4b	7.22679951560476e-207	0.353350044351677	0.388	0.209	1.46060845009888e-202	0
Tspan9	1.63123511804473e-206	0.291861593319154	0.297	0.127	3.2968892970802e-202	0
Fam135b	2.33975460440911e-193	0.377790206624871	0.473	0.291	4.72887803097124e-189	0
Cacna1c	3.33367749357714e-191	0.357830097598004	0.699	0.524	6.73769558226876e-187	0
Dlgap1	9.54956498674357e-189	0.273669065657902	0.951	0.812	1.93006257947074e-184	0
Ppp3ca	3.01895029977259e-184	0.341321965824926	0.838	0.728	6.10160045087038e-180	0
Pde3b	5.03849928120846e-183	0.311222303787713	0.373	0.204	1.01833108972504e-178	0
Dgkd	3.93194977501261e-181	0.3089043007656	0.346	0.181	7.94686369027799e-177	0
Prkce	2.01396883670693e-178	0.348155222216061	0.674	0.508	4.07043241586838e-174	0
Rnf112	1.94129835493031e-170	0.284730328471378	0.306	0.153	3.92355810514965e-166	0
Cdh8	6.85614723887957e-169	0.294540079826229	0.495	0.305	1.38569591844995e-164	0
Tiam1	3.17019212326653e-160	0.314592679709868	0.431	0.266	6.40727530033399e-156	0
Galnt7	7.04529076601883e-156	0.297092388672619	0.356	0.201	1.42392371672006e-151	0
Arhgef3	1.63272958876633e-154	0.283034616335639	0.26	0.124	3.29990977185563e-150	0
St3gal5	3.20488306284314e-151	0.262697060094516	0.277	0.137	6.47738915831226e-147	0
Cntnap4	5.21955272659562e-145	0.289737066578402	0.366	0.209	1.05492380157224e-140	0
Aig1	2.7508171620977e-143	0.340287079901655	0.493	0.351	5.55967656631566e-139	0
Spred2	1.79075259996975e-142	0.311348431307229	0.388	0.24	3.61929007979887e-138	0
Kcnh1	4.55242220697762e-142	0.254892820598816	0.334	0.184	9.20090052252246e-138	0
Slc35f3	1.20547684794791e-139	0.279968975273925	0.34	0.194	2.43638925738752e-135	0
Apba1	5.40580772967078e-137	0.341534943685781	0.514	0.372	1.09256780024376e-132	0
Mcu	4.36114931222681e-135	0.307304041492256	0.371	0.231	8.81431887494161e-131	0
Reep3	1.74074639155629e-133	0.26142392382079	0.279	0.148	3.51822253197441e-129	0
Clvs1	3.01133458978679e-133	0.307359406486916	0.387	0.247	6.08620833941807e-129	0
Jmjd1c	4.64259060308145e-131	0.34852261065806	0.602	0.483	9.38313986788791e-127	0
Mtus2	1.55430987000323e-130	0.308220685890301	0.464	0.317	3.14141567826352e-126	0
1700025G04Rik	5.7539761320346e-129	0.286629566356482	0.374	0.234	1.16293611604551e-124	0
Mtch2	1.15162757820501e-126	0.257729719196712	0.303	0.172	2.32755449831015e-122	0
Adam22	1.66577902950178e-119	0.326389431592633	0.602	0.489	3.36670599652604e-115	0
Srrm4	6.85188013036971e-98	0.269594565329593	0.369	0.247	1.38483349314902e-93	0
Prkcb	7.57884832441058e-97	0.253152301426803	0.623	0.496	1.53176103484662e-92	0
Vsnl1	1.85254280968177e-96	0.261280895677041	0.382	0.26	3.74417427264783e-92	0
Rabgap1l	1.64007150024057e-92	0.300005399478155	0.668	0.586	3.31474850913621e-88	0
Rtn1	7.68960445768539e-84	0.264139805779837	0.562	0.454	1.5541459569428e-79	0
Setbp1	9.77545061186912e-82	0.262438235428373	0.555	0.454	1.97571632316487e-77	0
Rit2	1.60774839637102e-75	0.293732296647107	0.463	0.361	3.24942028390546e-71	0
D430041D05Rik	7.77657542461449e-72	0.278091347344221	0.422	0.323	1.57172365906883e-67	0
Slc2a13	6.79503362677097e-54	0.253332566432165	0.414	0.328	1.37334424630668e-49	0
Snhg11	0	1.72493868235403	0.989	0.468	0	1
Lingo2	0	1.58614597783386	0.884	0.328	0	1
Sgcz	0	1.515122139224	0.809	0.332	0	1
Asic2	0	1.44898036764768	0.769	0.372	0	1
Nrg1	0	1.43118706659138	0.774	0.363	0	1
Meg3	0	1.41097710891853	0.998	0.792	0	1
Mgat4c	0	1.39932769672517	0.654	0.178	0	1
Galntl6	0	1.39504467450046	0.759	0.286	0	1
Tenm2	0	1.31559513217274	0.869	0.601	0	1
Tenm3	0	1.28127880912592	0.62	0.144	0	1
Dcc	0	1.27720539942416	0.688	0.222	0	1
Lrrtm4	0	1.26651999265306	0.837	0.372	0	1
Cntn5	0	1.25987494722391	0.652	0.224	0	1
Mdga2	0	1.23497700833979	0.924	0.487	0	1
Rmst	0	1.22733706386323	0.551	0.065	0	1
Unc5d	0	1.22399106001695	0.583	0.131	0	1
Pcdh15	0	1.18978006302933	0.649	0.213	0	1
Zfp804b	0	1.13497337081844	0.439	0.11	0	1
Zfhx3	0	1.11445131991785	0.468	0.07	0	1
Cntnap5a	0	1.10865290954861	0.602	0.123	0	1
Lrfn5	0	1.08327734403133	0.83	0.33	0	1
Pcdh7	0	1.08134998674144	0.738	0.338	0	1
Dscam	0	1.06037424122328	0.803	0.272	0	1
Cntnap2	0	1.05758986155329	0.978	0.819	0	1
Robo1	0	1.04411947954397	0.722	0.37	0	1
Ahi1	0	1.02336230264985	0.834	0.48	0	1
Htr2c	0	1.02158683028384	0.432	0.047	0	1
Usp29	0	1.02137983711155	0.723	0.226	0	1
Nrg3	0	1.01798816659456	0.973	0.723	0	1
Gm32647	0	1.01602509862309	0.27	0.042	0	1
Bc1	0	0.999355805956102	0.768	0.28	0	1
Rbms3	0	0.996344810175428	0.586	0.132	0	1
C130073E24Rik	0	0.996292162384569	0.469	0.053	0	1
Prkg1	0	0.983461544912919	0.611	0.211	0	1
Agbl4	0	0.967564310356569	0.766	0.26	0	1
Il1rapl2	0	0.957434878350585	0.285	0.051	0	1
Grm7	0	0.956810899981859	0.756	0.344	0	1
Frmd4a	0	0.956340982158625	0.868	0.422	0	1
Sgcd	0	0.951957134717313	0.526	0.151	0	1
Grm8	0	0.951188264322217	0.474	0.124	0	1
Grip1	0	0.947700166461114	0.76	0.218	0	1
Rian	0	0.947338350358704	0.917	0.54	0	1
Gm26871	0	0.937516764429115	0.559	0.177	0	1
A230006K03Rik	0	0.926274497944851	0.665	0.145	0	1
Robo2	0	0.911990616678371	0.561	0.184	0	1
Epha5	0	0.909461082328398	0.66	0.274	0	1
Lhfpl3	0	0.908491511429757	0.631	0.126	0	1
Csmd3	0	0.908207303062964	0.871	0.561	0	1
Grm5	0	0.857715318103843	0.791	0.353	0	1
Gabrg3	0	0.856393816367095	0.579	0.159	0	1
Nkain3	0	0.85386726536872	0.425	0.066	0	1
Pdzrn4	0	0.852902688940848	0.498	0.101	0	1
Gpc6	0	0.840978560898793	0.508	0.161	0	1
Cntnap5b	0	0.836779625148402	0.446	0.083	0	1
Tenm4	0	0.83236716446564	0.668	0.194	0	1
Khdrbs2	0	0.805120416956063	0.532	0.147	0	1
Epha6	0	0.798665109053176	0.577	0.159	0	1
Kcnb2	0	0.792276640792601	0.655	0.293	0	1
Sntg1	0	0.791680884397311	0.767	0.315	0	1
Cep112	0	0.769435238334489	0.438	0.069	0	1
Ccdc85a	0	0.768842779364013	0.566	0.117	0	1
Egfem1	0	0.763115399348851	0.464	0.128	0	1
Nxph1	0	0.75335969925467	0.42	0.081	0	1
Grid1	0	0.743074263648576	0.679	0.22	0	1
Elavl2	0	0.730476335303474	0.485	0.109	0	1
Fam155a	0	0.730464324314898	0.961	0.777	0	1
Pam	0	0.708774373938326	0.557	0.188	0	1
Dlg2	0	0.707769475389823	0.969	0.814	0	1
Cacnb2	0	0.702857559960759	0.621	0.172	0	1
Thsd7b	0	0.702183432224443	0.361	0.071	0	1
Dgkb	0	0.696451531441243	0.581	0.194	0	1
Cdh13	0	0.694774262303192	0.439	0.104	0	1
6330411D24Rik	0	0.690564908278694	0.331	0.029	0	1
Tafa2	0	0.671540098670046	0.455	0.13	0	1
Slc35f1	0	0.671446266246886	0.562	0.149	0	1
Sdk1	0	0.666141610492662	0.377	0.093	0	1
Hs3st4	0	0.662461623703809	0.376	0.084	0	1
Kcnc2	0	0.648826753963756	0.548	0.116	0	1
Dok6	0	0.648372161972416	0.615	0.194	0	1
5330434G04Rik	0	0.63714192264538	0.662	0.27	0	1
Tshz2	0	0.636629472150646	0.389	0.062	0	1
Csmd1	0	0.634217327681491	0.905	0.553	0	1
B830012L14Rik	0	0.630054580863524	0.637	0.233	0	1
Pak3	0	0.628810163044041	0.513	0.13	0	1
Nhs	0	0.617206745960584	0.465	0.073	0	1
Gnas	0	0.616766967206624	0.561	0.208	0	1
Hs3st5	0	0.612781638999026	0.433	0.128	0	1
Slit2	0	0.609882913958819	0.36	0.084	0	1
Snrpn	0	0.595404323385658	0.494	0.135	0	1
Nell1	0	0.578251194071475	0.367	0.095	0	1
Tanc2	0	0.574390324777301	0.745	0.351	0	1
Mir100hg	0	0.572783694871559	0.607	0.219	0	1
Spock3	0	0.568864132321934	0.518	0.167	0	1
Kcnip1	0	0.567736432447229	0.354	0.057	0	1
Chrm2	0	0.55444618856715	0.297	0.047	0	1
Klhl1	0	0.553133407019247	0.274	0.018	0	1
Mirg	0	0.543662599950418	0.54	0.18	0	1
Rtl4	0	0.543546651406903	0.403	0.105	0	1
Scn3a	0	0.539298883316051	0.418	0.083	0	1
Cdk14	0	0.535957153891001	0.538	0.198	0	1
Lrrc7	0	0.523464232193395	0.749	0.342	0	1
Csrnp3	0	0.520162106777304	0.56	0.208	0	1
Grb10	0	0.504812718517733	0.408	0.082	0	1
Syn3	0	0.503568561417949	0.474	0.143	0	1
Dner	0	0.502803687896993	0.426	0.099	0	1
Zfhx4	0	0.500113348265124	0.344	0.089	0	1
Arhgap24	0	0.497648918120419	0.297	0.035	0	1
Pcdh17	0	0.49236578137754	0.357	0.088	0	1
C530008M17Rik	0	0.491456992079738	0.424	0.093	0	1
Lin28b	0	0.480525188261579	0.347	0.048	0	1
Nav1	0	0.47057704389827	0.472	0.136	0	1
Scn9a	0	0.467115488881454	0.332	0.046	0	1
Pakap	0	0.459715288525243	0.433	0.121	0	1
Resp18	0	0.45194469050845	0.312	0.032	0	1
Tmem130	0	0.446040425574183	0.366	0.073	0	1
Alk	0	0.443273526213662	0.271	0.044	0	1
Amy1	0	0.435454296820498	0.424	0.128	0	1
Rgs17	0	0.434014998736628	0.393	0.108	0	1
Gm13629	0	0.42050999033924	0.338	0.076	0	1
Grin3a	0	0.401591391128872	0.33	0.069	0	1
Samd5	0	0.391181153144407	0.289	0.055	0	1
Arhgap18	0	0.388806705365615	0.291	0.043	0	1
Epha10	0	0.363960809597796	0.301	0.055	0	1
A330102I10Rik	0	0.354078571983529	0.28	0.056	0	1
Gabra3	0	0.315654906012174	0.258	0.05	0	1
Vwa5b2	0	0.305668307225912	0.258	0.047	0	1
Cacna1b	2.13556871259865e-307	0.490232963267049	0.536	0.205	4.31619792503313e-303	1
Trerf1	5.25740692824609e-306	0.432125873061723	0.429	0.134	1.06257451426782e-301	1
Tafa1	1.15509795341589e-303	0.730180284554143	0.414	0.125	2.33456847364885e-299	1
Efna5	6.19495985202952e-300	0.623236443586997	0.419	0.131	1.25206333569369e-295	1
Plppr1	3.05423252013978e-294	0.337582532378789	0.262	0.054	6.17290934645451e-290	1
Cacna2d2	3.74755405106226e-293	0.36930233262598	0.333	0.087	7.57418149260192e-289	1
AC149090.1	5.44043443952439e-293	0.694423678620689	0.839	0.567	1.09956620457227e-288	1
Gm28905	6.7837040126469e-293	0.384603586824176	0.253	0.051	1.37105441799606e-288	1
Dach1	8.58875656309556e-293	0.672364395744849	0.267	0.059	1.73587358896724e-288	1
Fhod3	2.36319168716513e-289	0.371140338758102	0.351	0.096	4.77624671892944e-285	1
Cmip	2.36048143200366e-288	0.434006564961915	0.465	0.163	4.7707690222226e-284	1
Nova1	1.82851348198024e-284	0.611710192325717	0.558	0.243	3.69560859843027e-280	1
Aff2	3.80997495197269e-281	0.451739103061874	0.407	0.131	7.700340375432e-277	1
Ly6h	4.8412364906062e-281	0.33875868547539	0.284	0.067	9.78462307116418e-277	1
Slc24a3	1.38156679146725e-279	0.469789948724598	0.462	0.158	2.79228464223447e-275	1
Adarb2	7.00537787011765e-279	0.655775073820265	0.369	0.107	1.41585692132948e-274	1
Fat3	9.84878547492761e-277	0.519092450031742	0.516	0.191	1.99053803233762e-272	1
Ptpn5	4.29889458612123e-274	0.30667634959341	0.276	0.064	8.68849584800962e-270	1
Adgrl2	9.05058301066018e-274	0.408613828968568	0.319	0.086	1.82921333228453e-269	1
Rbms1	1.28215583954711e-272	0.423175277423869	0.359	0.105	2.59136516730866e-268	1
Cit	7.76258064135583e-272	0.441632577254957	0.507	0.193	1.56889517342443e-267	1
Ptprn2	3.10512224299209e-271	0.616010410989137	0.774	0.461	6.2757625653113e-267	1
Rnf157	1.74037800668824e-269	0.325631554254248	0.307	0.08	3.51747798931761e-265	1
Kcnma1	5.64644043075725e-269	0.528203766066024	0.781	0.382	1.14120207546035e-264	1
Btbd11	5.73334448678622e-268	0.318289917396432	0.294	0.072	1.15876625422436e-263	1
Ppp2r2b	1.37832864265602e-267	0.527541818644338	0.692	0.339	2.78574001967208e-263	1
Grin2b	1.96615596962259e-267	0.3540605066133	0.756	0.352	3.97379783020422e-263	1
Cdh12	5.01882626621652e-267	0.518310483867088	0.421	0.137	1.01435497666502e-262	1
Dzank1	2.15957902546645e-266	0.367462827482176	0.364	0.111	4.36472516837025e-262	1
Shisa9	3.8598378867039e-266	0.473691125558008	0.408	0.133	7.80111835281725e-262	1
Abr	5.07352716905052e-263	0.384048415841199	0.443	0.154	1.0254105761368e-258	1
Rasgrf2	1.98936514787773e-262	0.347295940383796	0.305	0.078	4.02070590037569e-258	1
Ccdc88a	7.43505972514083e-260	0.465463046623243	0.637	0.286	1.50269992104821e-255	1
Traf3	5.72186418693766e-257	0.36426146184252	0.379	0.121	1.15644597082197e-252	1
Snhg14	2.67406331036127e-256	0.573685175275218	0.925	0.731	5.40454935657115e-252	1
Rasgrf1	3.84787571765809e-256	0.521130658542061	0.616	0.291	7.77694161295877e-252	1
Stau2	9.92810916199072e-253	0.474056337568146	0.576	0.259	2.00657014272994e-248	1
Esrrg	3.16112429615093e-252	0.455193970509216	0.449	0.16	6.38894831495064e-248	1
Gm26691	4.25548424770134e-252	0.362050523718012	0.323	0.092	8.60075921302917e-248	1
Gabrb1	2.17672663886193e-247	0.476059227807973	0.665	0.33	4.39938220980385e-243	1
Hecw1	2.3208752604571e-247	0.410863034114292	0.55	0.227	4.69072098890984e-243	1
Zmat4	6.84323423023711e-246	0.399167002839614	0.333	0.097	1.38308607027322e-241	1
Adgrl3	3.01796832823532e-244	0.567829868953871	0.909	0.656	6.09961578819641e-240	1
Ube3a	5.12663803189141e-242	0.600452930433212	0.832	0.579	1.03614481262557e-237	1
Nkain2	1.36961593910768e-240	0.28990158841377	0.812	0.438	2.76813077453053e-236	1
Cadps	2.6019180361829e-239	0.56632043264484	0.818	0.539	5.25873654292926e-235	1
Frmd3	6.34117162954182e-235	0.281439439166107	0.264	0.066	1.2816141980467e-230	1
Ryr3	9.87067378541258e-233	0.505804622923167	0.464	0.181	1.99496187876974e-228	1
Atp8a2	1.21917551310578e-232	0.427778910595453	0.503	0.212	2.4640756295381e-228	1
Rnpc3	2.46289064735025e-232	0.381833570376284	0.403	0.144	4.97774828735958e-228	1
Grid2	5.50901504369623e-230	0.313250322318797	0.913	0.743	1.11342703048145e-225	1
Gpc5	1.0376320613252e-224	0.476601600208235	0.305	0.086	2.09715815914437e-220	1
2022-03-01	1.61360137063866e-224	0.645968644248845	0.573	0.265	3.26124973019779e-220	1
Chrm3	4.01653514307975e-224	0.522075252320106	0.402	0.141	8.11781917767848e-220	1
Sorcs3	5.55228374646051e-223	0.43406427710029	0.376	0.128	1.12217206799713e-218	1
Nexmif	6.84303326881405e-223	0.340668577604027	0.296	0.086	1.38304545396001e-218	1
Tro	7.98138010666412e-223	0.290314885882607	0.269	0.073	1.61311673335789e-218	1
Cplane1	8.07122853814516e-223	0.486450765367178	0.652	0.344	1.63127599984452e-218	1
Klf12	1.19515095363632e-222	0.466392187612377	0.607	0.288	2.41551959239436e-218	1
Camta1	1.73359506785833e-220	0.53284206989112	0.791	0.502	3.50376899164847e-216	1
Parp8	3.06866552433641e-220	0.38142025367653	0.431	0.167	6.20207989123632e-216	1
Kcnn2	3.39771794687241e-220	0.421365804800894	0.498	0.208	6.86712774242383e-216	1
5330417C22Rik	1.98075076620659e-219	0.292983016645402	0.283	0.08	4.00329537358013e-215	1
Kcnq1ot1	2.17145650971792e-219	0.479557643830278	0.639	0.33	4.38873075179089e-215	1
Zcchc18	1.03714841220381e-218	0.374953623275606	0.419	0.161	2.09618065590511e-214	1
Zfp804a	1.60191534168536e-218	0.584789441016042	0.419	0.161	3.23763109708028e-214	1
Gm9801	2.64655092861343e-217	0.324169136598227	0.352	0.119	5.3489440818206e-213	1
Upp2	7.70122382760423e-214	0.4471247353293	0.559	0.264	1.55649434779709e-209	1
Kcnh7	3.01984718738627e-213	0.396263222084488	0.578	0.262	6.10341315042638e-209	1
Cdh4	3.07569455555211e-213	0.451558622951494	0.352	0.122	6.21628626622636e-209	1
Slc8a3	5.39879108423845e-213	0.35853810365081	0.415	0.158	1.09114966603543e-208	1
Trank1	1.01695668742175e-212	0.334774705300206	0.407	0.151	2.0553711609481e-208	1
Wsb1	2.39878162893333e-212	0.38189116266327	0.427	0.168	4.84817755023714e-208	1
Ctnna2	1.2007728732359e-211	0.673138965723472	0.911	0.733	2.42688205409707e-207	1
Xkr4	1.83265379727878e-211	0.472332639478757	0.821	0.522	3.70397658968015e-207	1
Ttc3	6.11089768677214e-211	0.503529718004379	0.875	0.652	1.23507353147352e-206	1
Lsamp	1.79679054544295e-209	0.621762209740198	0.987	0.945	3.63149337139475e-205	1
Gabra2	5.46818194822663e-209	0.378221490020835	0.344	0.115	1.10517425355609e-204	1
Fnbp1l	1.71425649604551e-208	0.348098885820621	0.342	0.116	3.46468380415757e-204	1
Focad	1.45321420654588e-207	0.444660544629224	0.543	0.257	2.93709123284987e-203	1
Maged1	6.7829106176156e-207	0.319557552381884	0.318	0.104	1.37089406492629e-202	1
Lrp1b	4.34955205418429e-205	0.701361810069319	0.922	0.692	8.79087965671187e-201	1
Nlgn1	3.8841251889484e-203	0.630366422594164	0.942	0.773	7.85020541938361e-199	1
Atrnl1	4.34223136600398e-203	0.354591602182105	0.478	0.192	8.77608381383065e-199	1
Dync2h1	7.19716184678383e-203	0.376072084321751	0.43	0.176	1.45461838085348e-198	1
Pakap.1	1.53686117628652e-202	0.279264196962359	0.258	0.072	3.10615012339269e-198	1
Miat	1.67205476487171e-202	0.257236986024126	0.255	0.071	3.37938988528221e-198	1
Sclt1	3.77179295172127e-201	0.408981212530943	0.534	0.25	7.62317073472385e-197	1
Rimbp2	8.73677397759605e-201	0.298756793979792	0.34	0.115	1.76578938861194e-196	1
Cntn3	2.04680955477522e-200	0.475134908949095	0.429	0.17	4.1368067911562e-196	1
Tmtc1	2.44576796807632e-200	0.29432312720616	0.294	0.09	4.94314164027905e-196	1
Plekha6	1.17268919699371e-199	0.302207935365536	0.341	0.118	2.370122136044e-195	1
9530059O14Rik	1.62716092593935e-199	0.31493857475712	0.326	0.107	3.28865494741602e-195	1
Pbx3	1.85481674652263e-199	0.584447104225849	0.361	0.135	3.74877012639688e-195	1
Grik1	7.73987410347889e-198	0.473933147572803	0.333	0.111	1.56430595505412e-193	1
Grik4	2.71726594858074e-197	0.303642947237228	0.305	0.097	5.49186620867653e-193	1
Plxna4	9.08619059236753e-197	0.362420220870252	0.489	0.21	1.8364099806234e-192	1
Evl	1.48319321248413e-195	0.304608326397657	0.338	0.118	2.99768180175168e-191	1
Nrg3os	1.51844948864608e-195	0.3333340260722	0.387	0.145	3.06893826150259e-191	1
Rcan2	2.11248940801193e-195	0.31172180623563	0.347	0.121	4.26955234253291e-191	1
Ldb2	2.64778916398199e-195	0.351166150634952	0.321	0.106	5.351446679324e-191	1
Myt1l	6.66804146066699e-195	0.469793413158978	0.755	0.467	1.34767785961541e-190	1
Pde8b	1.18186037781858e-194	0.300627656687764	0.377	0.137	2.38865800960912e-190	1
Basp1	5.04274690046689e-194	0.280939120787577	0.288	0.09	1.01918957605336e-189	1
Erc2	1.27318567393337e-193	0.421457965499171	0.798	0.486	2.57323556558674e-189	1
Astn1	6.03248951933164e-193	0.361457221637394	0.469	0.203	1.21922645675212e-188	1
Snph	1.9888263675554e-192	0.329565758168934	0.375	0.142	4.01961697146623e-188	1
Fstl5	2.15253046439276e-192	0.648120072004999	0.459	0.211	4.35047932158422e-188	1
Magi3	4.656291161565e-190	0.320855813834258	0.343	0.122	9.41083006663903e-186	1
Jazf1	1.02504647009813e-189	0.378334025451407	0.445	0.191	2.07172142071533e-185	1
Cdr1os	6.60019910015929e-186	0.512736775361551	0.768	0.528	1.33396624013319e-181	1
Enah	4.48204854186794e-185	0.370026921642824	0.514	0.239	9.05866830796929e-181	1
Aff3	6.81022868524315e-185	0.390673686767022	0.499	0.229	1.37641531957449e-180	1
Akap6	8.69865349278979e-185	0.483966950709087	0.786	0.532	1.75808485742774e-180	1
Prickle1	9.60496232624432e-185	0.307773162709659	0.516	0.222	1.94125893575724e-180	1
Peg3	1.00226504788914e-184	0.420575612509688	0.602	0.318	2.02567788828874e-180	1
Gria3	1.1987174427952e-180	0.282790283552431	0.513	0.218	2.42272782363338e-176	1
Srgap1	2.06871183394342e-177	0.271128736661742	0.303	0.1	4.18107348758304e-173	1
Thsd7a	1.21897726074372e-176	0.34242030264583	0.324	0.114	2.46367494168913e-172	1
Tjp1	3.42161370353622e-174	0.36241956173186	0.615	0.314	6.91542345621706e-170	1
Ppm1e	9.08439543475929e-173	0.340559386526703	0.499	0.226	1.8360471613192e-168	1
Osbpl9	1.45589871534121e-171	0.377179407103308	0.553	0.281	2.94251689357611e-167	1
Catspere2	3.41606714168648e-171	0.2737684133951	0.264	0.085	6.90421330006254e-167	1
Samd4	4.18330132532948e-169	0.266132552982049	0.337	0.124	8.45487030862341e-165	1
Klhl29	9.57378749373037e-169	0.372929976283767	0.432	0.19	1.93495819035785e-164	1
Lrch1	2.98447628805769e-168	0.308466882600681	0.4	0.167	6.03192502579339e-164	1
A330023F24Rik	1.01771612638576e-167	0.378860627278733	0.591	0.319	2.05690606303825e-163	1
Srrm2	6.51867373321068e-167	0.417069027565174	0.678	0.404	1.31748914821921e-162	1
Lrrfip1	9.72862146021128e-167	0.271432364840099	0.319	0.116	1.9662516833233e-162	1
Tcf20	2.37242968212798e-166	0.331558122109974	0.454	0.207	4.79491763054885e-162	1
Csmd2	5.83646597604023e-165	0.358264068805705	0.5	0.239	1.17960813841749e-160	1
A830018L16Rik	1.57965365847668e-164	0.318227668825027	0.3	0.105	3.19263800914722e-160	1
Rgs6	4.63991060953871e-164	0.583851398384088	0.378	0.152	9.37772333293869e-160	1
Gse1	1.68385855827628e-163	0.296879064706902	0.356	0.142	3.40324653213218e-159	1
Tnrc6a	2.77165242657337e-163	0.38198833165594	0.637	0.364	5.60178671934743e-159	1
Prkn	8.0602281344945e-163	0.450339520891475	0.744	0.482	1.62905270826268e-158	1
Ncam2	1.96576724552379e-162	0.636831418111434	0.701	0.458	3.97301217992814e-158	1
Tmem178b	3.79587459085441e-162	0.429173524444617	0.765	0.499	7.67184213557585e-158	1
Ralgapa2	8.85614202328496e-161	0.381945696933922	0.491	0.243	1.78991486432612e-156	1
Mtss1	1.43652501646849e-160	0.273829224708474	0.326	0.122	2.90336071078446e-156	1
Ank3	3.18185384615757e-160	0.445900667799856	0.919	0.778	6.43084480846907e-156	1
Gm20642	9.9310029252665e-160	0.295959660232922	0.312	0.116	2.00715500122561e-155	1
Lncpint	2.25004373404884e-154	0.427999768170857	0.745	0.492	4.54756339088612e-150	1
E130307A14Rik	2.53667326051353e-154	0.323059455797366	0.403	0.179	5.12687032682389e-150	1
Hs6st3	2.18072854640135e-153	0.705950633478971	0.62	0.385	4.40747046513177e-149	1
Las1l	1.16006518719782e-152	0.289588857033216	0.334	0.134	2.34460774984552e-148	1
Mmp16	1.24505679798337e-151	0.330099647426901	0.563	0.292	2.51638429440419e-147	1
B230209E15Rik	6.21592197854325e-151	0.256777361019567	0.267	0.092	1.25629999108338e-146	1
Armc9	1.5747862004241e-149	0.258381156305039	0.291	0.108	3.18280038967716e-145	1
Eml6	7.00404674152724e-149	0.338996897133059	0.51	0.259	1.41558788693007e-144	1
Alcam	1.23144371691949e-148	0.366592487895683	0.427	0.195	2.48887089626599e-144	1
Sorcs1	1.25963069924918e-148	0.619476761220168	0.403	0.186	2.54583960625252e-144	1
Syt16	7.67951415129473e-147	0.272551208954952	0.299	0.112	1.55210660511818e-142	1
Nalcn	9.92590971827377e-147	0.358318200791894	0.571	0.314	2.00612561316031e-142	1
Hdac9	1.28315072220813e-146	0.590476996441441	0.517	0.277	2.59337592465484e-142	1
Etl4	2.64344318380511e-145	0.30932400018745	0.505	0.248	5.3426630187885e-141	1
Macrod2	2.71458809103761e-145	0.455809753749256	0.928	0.757	5.48645399079612e-141	1
Smyd3	7.59011806749541e-145	0.409542523719355	0.698	0.434	1.5340387626215e-140	1
Zfp462	5.35369484772747e-144	0.266667845765758	0.322	0.128	1.0820352656742e-139	1
Hs6st2	7.56301672595855e-144	0.301308020421018	0.329	0.134	1.52856131048348e-139	1
Atp1b1	8.0497648101143e-144	0.330786500924302	0.498	0.255	1.6269379657722e-139	1
Sorbs2	2.78477715266837e-143	0.29680141276245	0.576	0.302	5.62831310325804e-139	1
2210408F21Rik	5.09887023587843e-143	0.255032581175444	0.297	0.114	1.03053266337339e-138	1
Nebl	2.29109144440787e-142	0.271048750207758	0.49	0.234	4.63052491829274e-138	1
Slc35f4	1.12247072762622e-141	0.343818128437151	0.366	0.159	2.26862558760536e-137	1
Cacna1d	2.04344434528707e-141	0.338670510138966	0.604	0.332	4.1300053662597e-137	1
Dip2c	5.50771366591144e-141	0.39889457675637	0.766	0.533	1.11316400901736e-136	1
Pcdh11x	2.16949963172538e-139	0.506014667351889	0.323	0.136	4.38477570568017e-135	1
Rasgef1b	3.37732397744919e-139	0.329953628453788	0.353	0.152	6.82590949082255e-135	1
Nsf	5.39882210087066e-139	0.340385165586322	0.553	0.303	1.09115593480697e-134	1
Fam189a1	2.66451301296013e-138	0.27210362247345	0.336	0.138	5.38524725049372e-134	1
Fchsd2	1.84064128665407e-136	0.282533053729548	0.493	0.249	3.72012010445654e-132	1
Arhgap32	7.26261592447617e-136	0.261271856572556	0.407	0.184	1.46784730449588e-131	1
Elavl4	5.72099651921304e-134	0.299799842846256	0.342	0.149	1.15627060649815e-129	1
Prepl	1.15557015261088e-132	0.265199690418999	0.346	0.151	2.33552283544184e-128	1
Fndc3a	2.00281289953709e-132	0.302942390615678	0.351	0.155	4.04788515125442e-128	1
Sh3kbp1	1.57855754672867e-130	0.253277961558246	0.289	0.113	3.19042265769331e-126	1
Sec24b	9.99731964023684e-130	0.278000362535585	0.403	0.192	2.02055827248827e-125	1
Atp1a3	1.01375521544555e-129	0.288248067506155	0.409	0.198	2.048900665937e-125	1
Etnk1	4.68107434402416e-129	0.304654215867559	0.479	0.251	9.46091935670723e-125	1
Klhl32	2.30934500760674e-127	0.261525190765103	0.316	0.133	4.66741719487399e-123	1
Scn1a	2.10912008379423e-126	0.336717784930018	0.583	0.336	4.26274260135651e-122	1
Ntng1	2.57821248249181e-125	0.624655918102974	0.421	0.224	5.2108252483642e-121	1
Tango2	8.00249728387368e-125	0.255295149975319	0.316	0.135	1.61738472604371e-120	1
Garnl3	1.24602425723473e-124	0.251156089645917	0.4	0.188	2.51833962629711e-120	1
Unc79	3.8212771902566e-124	0.320879422868799	0.569	0.326	7.72318332922762e-120	1
AY036118	1.34783123707682e-122	0.347501704588534	0.544	0.316	2.72410171325596e-118	1
Nr6a1	2.12272826577066e-122	0.27747835230177	0.404	0.196	4.29024609794908e-118	1
Rmdn1	4.93915138146781e-122	0.326688649425993	0.483	0.262	9.9825188570846e-118	1
Reep1	1.26792017693549e-121	0.258397074662704	0.324	0.142	2.56259346960432e-117	1
Osbpl6	7.29235691874759e-121	0.332285165017529	0.606	0.364	1.47385825684808e-116	1
Ptprs	1.05802147645098e-120	0.324342704421348	0.503	0.278	2.13836720605508e-116	1
Dmd	2.78599632839969e-120	0.444217027286621	0.745	0.545	5.63077717932862e-116	1
Dzip3	7.15806891584389e-120	0.292824984900154	0.454	0.237	1.44671730858121e-115	1
Tnrc6c	8.07711466442257e-120	0.349696676698912	0.615	0.381	1.63246564482645e-115	1
Dab1	1.15244063136178e-117	0.540120149313523	0.745	0.588	2.3291977600453e-113	1
Map2k4	1.76057557013058e-117	0.312279397349093	0.534	0.307	3.55829928479092e-113	1
Epb41l3	3.08444276665825e-117	0.328997706982942	0.559	0.328	6.23396727569298e-113	1
Gmds	6.55249503444015e-116	0.274795187875254	0.411	0.206	1.3243247714107e-111	1
Celf4	1.36925121586217e-115	0.405056020659793	0.661	0.43	2.76739363237903e-111	1
Map1b	4.72277675839543e-115	0.33184357374933	0.63	0.387	9.545204106393e-111	1
Pabpn1	1.99984611738455e-114	0.305848146115973	0.514	0.291	4.04188898784592e-110	1
Ptprm	3.90981715993293e-114	0.325684207786736	0.338	0.151	7.90213146194045e-110	1
Pcsk1n	3.72490364755692e-113	0.287482248618655	0.405	0.205	7.52840276207729e-109	1
Gprasp1	2.28758898090954e-110	0.288601982688081	0.47	0.26	4.62344608931627e-106	1
Map2	7.21340444221597e-110	0.364683587177906	0.733	0.522	1.45790117181627e-105	1
Gucy1a2	1.10223236886384e-109	0.275179898329222	0.394	0.197	2.22772184071071e-105	1
Ptprg	2.75582987199257e-109	0.40756893292628	0.606	0.389	5.56980775428417e-105	1
Clasp1	4.12614970255675e-108	0.280178081584351	0.428	0.227	8.33936116383745e-104	1
Adam23	4.28251895843311e-107	0.32175240631542	0.49	0.279	8.65539906688916e-103	1
Nktr	1.57671251806775e-105	0.294227468982876	0.589	0.362	3.18669367026672e-101	1
Rit21	2.01803729527366e-105	0.323863691597178	0.61	0.381	4.0786551774776e-101	1
Opcml	4.02289837893708e-105	0.472812880279291	0.839	0.725	8.13067991366974e-101	1
Ksr2	6.676512143764e-105	0.270663507035286	0.48	0.268	1.34938986937614e-100	1
Ccser1	9.26387125611724e-105	0.394105847855082	0.92	0.805	1.87232101957386e-100	1
Lcorl	9.84202536813898e-105	0.308914797749598	0.32	0.15	1.98917174715457e-100	1
Rtn3	2.87594561207101e-104	0.308550964616843	0.634	0.408	5.81257367655671e-100	1
Gabrb3	1.65205861863362e-103	0.357303466474537	0.784	0.576	3.3389756741204e-99	1
2210408I21Rik	4.06575679319956e-102	0.26463410451492	0.407	0.212	8.21730105473564e-98	1
A230057D06Rik	6.71786170594608e-102	0.340940828957256	0.864	0.71	1.35774702938876e-97	1
Nr3c2	1.09460878702544e-101	0.265407597421799	0.465	0.257	2.21231381945712e-97	1
Mycbp2	1.58219310941812e-100	0.333338411207075	0.864	0.731	3.19777049344496e-96	1
Srek1	1.13091954060067e-99	0.275450107814272	0.552	0.33	2.28570148350802e-95	1
Acaca	2.68858048848581e-99	0.256533333583008	0.449	0.246	5.43389002527868e-95	1
Tra2a	1.12099490475372e-98	0.273621075769033	0.523	0.308	2.26564280199774e-94	1
Dnmt3a	2.60544764936439e-98	0.273483644834247	0.48	0.275	5.26587024413037e-94	1
Sema6d	1.92682705360633e-97	0.328609531079466	0.451	0.252	3.89431015804376e-93	1
Sybu	3.98100975362761e-97	0.252628368911224	0.489	0.278	8.04601881305676e-93	1
Ica1	4.91775425328774e-97	0.250640292935861	0.379	0.197	9.93927312131985e-93	1
Gria2	5.30908767288384e-97	0.30498478723982	0.944	0.794	1.07301970956655e-92	1
Pja2	6.76781032290002e-97	0.25470014279464	0.437	0.24	1.36784214436132e-92	1
Arglu1	1.19291563816257e-96	0.260520921334789	0.509	0.297	2.41100179629036e-92	1
Kmt2a	1.18521879489817e-94	0.27901925787905	0.537	0.329	2.39544570636869e-90	1
Dnajc6	1.26346864831033e-94	0.275068558146576	0.574	0.355	2.55359648510001e-90	1
Rsrp1	1.90519518909784e-91	0.251881683398523	0.469	0.269	3.85058999668564e-87	1
Chd6	3.14148745784094e-91	0.259973974936846	0.499	0.296	6.34926030104232e-87	1
Klhdc10	2.3160343717116e-90	0.28205776797485	0.493	0.296	4.68093706866632e-86	1
Nbeal1	1.07966502319816e-89	0.263391887379112	0.478	0.283	2.1821109783858e-85	1
Rab3c	2.09554806371426e-89	0.285749121560056	0.432	0.245	4.23531219157288e-85	1
Fbxl17	8.73901342221159e-88	0.309517024978163	0.725	0.528	1.76624200276318e-83	1
Snap91	1.47266371657573e-86	0.264408204503322	0.607	0.395	2.97640063757121e-82	1
Rapgef6	2.41512979787325e-86	0.25325932324588	0.502	0.302	4.88121883448163e-82	1
Runx1t1	5.90373644682157e-85	0.275818488888375	0.39	0.215	1.19320417326711e-80	1
Dync1i1	9.51503508131461e-85	0.266577757635024	0.552	0.346	1.9230837402845e-80	1
Ssbp2	5.73392878672906e-84	0.296325062722643	0.525	0.329	1.15888434708581e-79	1
Ralgapa1	2.14332021698731e-82	0.257825616577032	0.631	0.419	4.33186449055306e-78	1
Usp9x	3.84397888400275e-81	0.255107801243674	0.513	0.321	7.76906572245795e-77	1
Atp6v0b	1.5485952444091e-80	0.262284051927557	0.567	0.37	3.12986584847523e-76	1
Nf1	1.93759577724351e-79	0.251548876265292	0.594	0.39	3.91607482538686e-75	1
Apc	2.59527582920454e-79	0.254459142749759	0.697	0.495	5.24531197840529e-75	1
Brinp3	2.56400258561485e-77	0.471849485846914	0.628	0.469	5.18210562578617e-73	1
Prpf4b	2.60667724067541e-76	0.26669673191891	0.629	0.431	5.26835537112907e-72	1
Ubn2	5.30374540830211e-75	0.262109951199728	0.608	0.412	1.07193998447194e-70	1
Prrc2c	4.28678087780003e-74	0.263186486670847	0.491	0.312	8.66401283212165e-70	1
Nyap2	6.56603342625736e-72	0.258706229261014	0.371	0.21	1.32706101578087e-67	1
Usp34	9.71018389304444e-62	0.256709621942648	0.72	0.559	1.96252526662321e-57	1
Cadm1	9.10348065198863e-59	0.332597896080987	0.748	0.624	1.83990447457342e-54	1
Inpp4b	2.70055595974215e-47	0.299160887648666	0.599	0.447	5.45809365023487e-43	1
Pbx1	1.56584185491757e-37	0.259267348695574	0.641	0.516	3.16472297297391e-33	1
Cdh181	1.51822138235573e-33	0.427892831600285	0.73	0.635	3.06847723587916e-29	1
Erbb4	1.59472038264372e-31	0.267167915983771	0.502	0.405	3.22308936536122e-27	1
Ptprt	4.43929042213244e-30	0.258800076670444	0.465	0.347	8.97224987217187e-26	1
Cdh81	3.18432419238668e-21	0.260612607287156	0.475	0.384	6.43583762523272e-17	1
Lrrc4c	2.31649805390121e-20	0.255246961774561	0.908	0.871	4.68187421673973e-16	1
Schip1	8.77170155518473e-12	0.393735803356956	0.499	0.461	1.77284860131839e-07	1
Celf2	0	2.53796640974904	0.98	0.711	0	2
Ptprd	0	2.23706846026126	0.984	0.853	0	2
Dpp10	0	2.21931432953172	0.893	0.571	0	2
Kcnq5	0	2.18371376857141	0.886	0.195	0	2
Lingo21	0	2.06201085970749	0.914	0.343	0	2
Kcnh71	0	1.96639410954235	0.85	0.244	0	2
Csmd11	0	1.92973643860002	0.979	0.557	0	2
Tafa11	0	1.92924039348517	0.64	0.111	0	2
Kalrn	0	1.8389476179441	0.918	0.27	0	2
Kctd16	0	1.80035356703671	0.85	0.213	0	2
Lrrtm41	0	1.79746309126538	0.838	0.387	0	2
Grin2b1	0	1.67158930756736	0.925	0.348	0	2
Phactr1	0	1.66032345225002	0.929	0.468	0	2
R3hdm1	0	1.64305018005749	0.894	0.488	0	2
Grm71	0	1.62432632290899	0.926	0.34	0	2
Schip11	0	1.57056982606926	0.886	0.422	0	2
Dlgap2	0	1.56959163609156	0.889	0.24	0	2
Tenm21	0	1.55737691160241	0.935	0.603	0	2
Nrg11	0	1.53975648682719	0.85	0.369	0	2
Hs6st31	0	1.53586424005069	0.798	0.374	0	2
Sgcz1	0	1.52820669942763	0.837	0.345	0	2
Nav3	0	1.52724128927501	0.955	0.573	0	2
Mef2c	0	1.51103262810671	0.766	0.165	0	2
Lrrc71	0	1.50359509300266	0.918	0.338	0	2
Epha61	0	1.46062715330107	0.686	0.161	0	2
Nrg31	0	1.45978836228688	0.989	0.729	0	2
Cdh121	0	1.45516055144726	0.677	0.119	0	2
Grm51	0	1.43786544450012	0.92	0.354	0	2
Pde1a	0	1.40107769444897	0.633	0.09	0	2
Dlg21	0	1.38699585129831	0.986	0.817	0	2
Opcml1	0	1.35935345450927	0.963	0.716	0	2
Pdzrn3	0	1.35475291135578	0.569	0.027	0	2
Kcnma11	0	1.31391971823726	0.931	0.379	0	2
Chrm31	0	1.30512986556062	0.686	0.12	0	2
Camk2a	0	1.29233962618777	0.77	0.099	0	2
Lrfn51	0	1.27566102505117	0.87	0.342	0	2
Arpp21	0	1.2464672764543	0.922	0.518	0	2
Homer1	0	1.23406852515919	0.637	0.168	0	2
Sorbs21	0	1.2204190535965	0.773	0.29	0	2
Tenm41	0	1.18976273628976	0.821	0.194	0	2
Epha51	0	1.18717813598237	0.811	0.271	0	2
Erc21	0	1.17183155858164	0.897	0.486	0	2
5730522E02Rik	0	1.15840535480033	0.691	0.119	0	2
Nlgn11	0	1.13081773805281	0.959	0.776	0	2
2022-03-11	0	1.13010861044842	0.773	0.254	0	2
Rgs61	0	1.12984025286541	0.608	0.136	0	2
Pcsk2	0	1.10071709691152	0.872	0.527	0	2
Unc5d1	0	1.10038458384133	0.662	0.138	0	2
Egfem11	0	1.08615686317673	0.518	0.134	0	2
Tafa21	0	1.08056915260068	0.513	0.135	0	2
Plcb1	0	1.07321332000903	0.917	0.461	0	2
Gria31	0	1.06762155093697	0.726	0.206	0	2
Gm268711	0	1.04268971854398	0.699	0.175	0	2
Dclk1	0	1.03314022015642	0.874	0.489	0	2
Dmd1	0	1.03170919144336	0.904	0.535	0	2
Kcnt2	0	1.03069308468862	0.612	0.081	0	2
Kcnb21	0	1.02145146863506	0.782	0.292	0	2
Prickle11	0	1.01819485426817	0.76	0.207	0	2
Cacna2d3	0	0.997076603935666	0.771	0.226	0	2
Pcdh151	0	0.985591108441034	0.623	0.231	0	2
Nell11	0	0.9704078083307	0.51	0.089	0	2
Agbl41	0	0.954549657975005	0.752	0.278	0	2
Syt1	0	0.947252164324564	0.977	0.799	0	2
Khdrbs21	0	0.942812613914598	0.636	0.149	0	2
Cttnbp2	0	0.942627360335741	0.738	0.22	0	2
Satb2	0	0.935412456937606	0.534	0.023	0	2
Pex5l	0	0.934259166230242	0.646	0.178	0	2
Efna51	0	0.9328918843346	0.59	0.122	0	2
Fstl4	0	0.932203152350295	0.575	0.093	0	2
Cnksr21	0	0.923701865952506	0.893	0.566	0	2
Meg31	0	0.921848006809603	0.995	0.799	0	2
Snhg111	0	0.905185103188241	0.97	0.487	0	2
Sipa1l1	0	0.903099965138357	0.753	0.246	0	2
Cntnap5a1	0	0.902552850753384	0.533	0.146	0	2
Mlip	0	0.894413058221259	0.537	0.034	0	2
Khdrbs3	0	0.882312200634209	0.598	0.082	0	2
Atrnl11	0	0.879620009084007	0.704	0.178	0	2
Nlk	0	0.874963419727058	0.684	0.221	0	2
Tmem132d	0	0.873889905618077	0.567	0.094	0	2
Rasal2	0	0.870480255100917	0.746	0.284	0	2
Nell2	0	0.868078789237908	0.761	0.301	0	2
Asic21	0	0.867595761684713	0.85	0.377	0	2
Cntn31	0	0.866030679955442	0.66	0.155	0	2
Etl41	0	0.857602669855296	0.696	0.236	0	2
Dok61	0	0.854678061880858	0.708	0.198	0	2
Grin2a	0	0.848652430363117	0.895	0.548	0	2
Cdh10	0	0.846397182309939	0.65	0.209	0	2
Robo21	0	0.833278680437757	0.682	0.184	0	2
Sntg11	0	0.828819504547721	0.797	0.327	0	2
Cdk141	0	0.826693436346063	0.694	0.193	0	2
Kcnq3	0	0.817852612232046	0.743	0.267	0	2
Ldb21	0	0.816040621265959	0.487	0.096	0	2
Bcl11a	0	0.812471977901041	0.583	0.079	0	2
Gria21	0	0.810183881830469	0.969	0.797	0	2
Prkg11	0	0.809881731015778	0.683	0.216	0	2
Ptprk	0	0.803206295915623	0.598	0.157	0	2
Cacna2d1	0	0.796908676166829	0.859	0.506	0	2
Pcdh71	0	0.795659682342903	0.757	0.349	0	2
Fat31	0	0.791990134419839	0.593	0.193	0	2
Asap1	0	0.791262822870089	0.647	0.216	0	2
Tenm31	0	0.785855569990691	0.532	0.169	0	2
Atp2b1	0	0.784724097271588	0.771	0.383	0	2
Chsy3	0	0.784066855063473	0.528	0.11	0	2
Nkain21	0	0.781016551043066	0.932	0.438	0	2
Ppm1e1	0	0.776456027391543	0.681	0.216	0	2
Chn1	0	0.770685470420329	0.607	0.115	0	2
Itpr1	0	0.768963699708271	0.606	0.134	0	2
A230006K03Rik1	0	0.766665390422329	0.662	0.162	0	2
Gm49678	0	0.761836313645995	0.396	0.025	0	2
Large1	0	0.750141538087468	0.786	0.396	0	2
Fam189a11	0	0.746905780329334	0.567	0.12	0	2
Gm20754	0	0.745841446562006	0.441	0.071	0	2
Thrb	0	0.745283903318729	0.619	0.177	0	2
Ak5	0	0.740531743267325	0.506	0.075	0	2
Cobl	0	0.729993658502269	0.524	0.08	0	2
Prickle2	0	0.714450067328753	0.697	0.211	0	2
Ppp2r2b1	0	0.696884142312847	0.791	0.34	0	2
Cfap54	0	0.693151911424041	0.527	0.079	0	2
Hecw11	0	0.690686455588403	0.643	0.227	0	2
Rapgef5	0	0.689823369424278	0.522	0.089	0	2
Epha4	0	0.678410300741485	0.501	0.067	0	2
9530059O14Rik1	0	0.67383255266385	0.489	0.098	0	2
Adcy2	0	0.6714934786596	0.553	0.123	0	2
Nwd2	0	0.670172543438752	0.431	0.047	0	2
Arhgap321	0	0.668381419551878	0.594	0.172	0	2
Tanc21	0	0.666188800724397	0.811	0.357	0	2
Rimbp21	0	0.646476697253805	0.513	0.104	0	2
Tmem132b	0	0.643276044413837	0.551	0.12	0	2
Slit21	0	0.636936882548008	0.463	0.082	0	2
Mrtfb	0	0.635953715624839	0.63	0.217	0	2
Pam1	0	0.631948634136504	0.607	0.195	0	2
Cap2	0	0.61978943953537	0.502	0.119	0	2
Cdh11	0	0.614672337466524	0.497	0.11	0	2
Kcnh5	0	0.614619942332082	0.313	0.052	0	2
Syt161	0	0.614486229222898	0.519	0.095	0	2
Trim9	0	0.610195761652884	0.628	0.211	0	2
Trank11	0	0.601981383646267	0.558	0.144	0	2
Gabra21	0	0.601180553739005	0.486	0.107	0	2
Cacng3	0	0.597985346848979	0.419	0.038	0	2
Nrg3os1	0	0.597332805062499	0.525	0.138	0	2
Frmpd4	0	0.597045037626586	0.804	0.328	0	2
Csmd21	0	0.591551815792341	0.633	0.234	0	2
Pde8b1	0	0.590029248627677	0.501	0.132	0	2
Ankrd33b	0	0.58838045821559	0.405	0.02	0	2
Npas2	0	0.574334919263576	0.419	0.049	0	2
Grm81	0	0.572662816683546	0.481	0.135	0	2
Frmd6	0	0.572087284970734	0.428	0.098	0	2
Brinp2	0	0.557114381596986	0.458	0.106	0	2
B230209E15Rik1	0	0.554360000238067	0.454	0.078	0	2
Fhod31	0	0.546110617251172	0.417	0.097	0	2
Trerf11	0	0.544063252778869	0.507	0.136	0	2
St6galnac5	0	0.543646691036041	0.35	0.08	0	2
Nin	0	0.543236982776366	0.452	0.092	0	2
Dgkh	0	0.527790394995174	0.477	0.122	0	2
Nrgn	0	0.524773475652497	0.379	0.037	0	2
Sorbs2os	0	0.522079825750954	0.392	0.069	0	2
Wasf1	0	0.51837032169613	0.516	0.167	0	2
Flrt2	0	0.518245946382006	0.412	0.091	0	2
Fnbp1l1	0	0.51405545890249	0.446	0.113	0	2
Cpne4	0	0.512162302362095	0.341	0.066	0	2
Shank2	0	0.507097900836884	0.501	0.111	0	2
Rasgrf21	0	0.504451382995605	0.359	0.08	0	2
Kcnb1	0	0.503647788431129	0.422	0.074	0	2
Ptk2b	0	0.500455395642434	0.371	0.029	0	2
Plppr4	0	0.496967577330648	0.495	0.145	0	2
Lingo1	0	0.495228730628641	0.404	0.064	0	2
Phf24	0	0.493409768258971	0.423	0.076	0	2
Dapk1	0	0.461785404321467	0.407	0.1	0	2
Camk2n1	0	0.458429769224374	0.366	0.069	0	2
2010300C02Rik	0	0.452390701889291	0.377	0.058	0	2
Tmtc11	0	0.448345668928989	0.372	0.088	0	2
Miat1	0	0.444417306455276	0.384	0.063	0	2
9130024F11Rik	0	0.443280977935743	0.29	0.008	0	2
Myrip	0	0.442841625466653	0.391	0.077	0	2
Lmo7	0	0.441794794974435	0.31	0.03	0	2
Lmo4	0	0.44154364984856	0.319	0.039	0	2
Basp11	0	0.418099864210928	0.38	0.086	0	2
Unc13b	0	0.417588467477082	0.374	0.08	0	2
Gm30382	0	0.415370559307881	0.279	0.047	0	2
Itga8	0	0.408083427173476	0.274	0.017	0	2
Mpped1	0	0.408028306033026	0.316	0.043	0	2
Fras1	0	0.404129650021041	0.263	0.043	0	2
Pde2a	0	0.400676699770138	0.323	0.04	0	2
Necab1	0	0.40055160806585	0.284	0.039	0	2
Pparg	0	0.398041019439524	0.28	0.025	0	2
Gm10115	0	0.385670844233749	0.286	0.012	0	2
Ildr2	0	0.359438160946719	0.293	0.045	0	2
Slc24a4	0	0.348050120681355	0.253	0.02	0	2
Plekhg5	0	0.346513550869416	0.274	0.03	0	2
Tiam2	0	0.342422458468001	0.275	0.043	0	2
Prmt8	0	0.33692786802788	0.285	0.046	0	2
Rasgrp1	0	0.33277303323378	0.257	0.027	0	2
Cntn51	1.69600996288445e-307	0.994540148275082	0.615	0.242	3.42780573598576e-303	2
Neto1	3.27305761380732e-303	0.437895789016508	0.352	0.08	6.61517674326598e-299	2
Ptprn21	3.49365615309349e-303	0.704225353297164	0.825	0.466	7.06102845101725e-299	2
Cadps1	1.04524327316026e-302	0.710871541343166	0.874	0.542	2.11254117938419e-298	2
Csrnp31	2.04700057207649e-301	0.531549115208586	0.6	0.215	4.13719285622379e-297	2
Gria1	1.22945804255154e-298	0.474100906317574	0.64	0.231	2.48485764980091e-294	2
Cx3cl1	4.21087640211224e-295	0.305269548203411	0.257	0.045	8.51060229630904e-291	2
Nyap21	4.16229447290104e-290	0.511196645066828	0.554	0.196	8.41241335918029e-286	2
Ptk2	1.55023308402375e-289	0.58448538717974	0.655	0.273	3.1331760861204e-285	2
Gm206421	1.15780136587794e-286	0.419367448257086	0.41	0.113	2.34003234057591e-282	2
Mast3	2.62046993639038e-286	0.300885821461866	0.281	0.054	5.29623178843859e-282	2
B230334C09Rik	3.45428157449331e-285	0.288087783808575	0.255	0.045	6.98144849020843e-281	2
Dgki	5.15395462838334e-276	0.64431803670678	0.772	0.396	1.04166576994256e-271	2
Slit31	9.14168619336559e-272	0.746650492932639	0.714	0.347	1.84762619654112e-267	2
Ctdspl	1.65328902549329e-271	0.387219181529875	0.372	0.099	3.34146244942449e-267	2
Ahi11	3.35338855841014e-269	0.679229218619984	0.835	0.492	6.77753361540273e-265	2
Plxna41	1.47424803775117e-268	0.474640840344907	0.575	0.21	2.9796027090989e-264	2
Arnt2	1.47673164526151e-268	0.442230501476738	0.403	0.116	2.98462232823805e-264	2
Gtdc1	2.4787647199106e-268	0.530360809741127	0.545	0.202	5.00983137541131e-264	2
Xylt1	6.64849489633955e-268	0.370743375725103	0.387	0.103	1.34372730349919e-263	2
Zbtb16	1.477891459501e-267	0.369239781399172	0.348	0.086	2.98696642879748e-263	2
Actn1	2.51175153883749e-266	0.31204842587353	0.286	0.061	5.07650103514446e-262	2
Gm15398	1.10687972097007e-265	0.409583411289295	0.261	0.052	2.23711460405262e-261	2
Klhl291	2.50280456961042e-264	0.507733334932306	0.525	0.188	5.05841831563962e-260	2
4930419G24Rik	2.12555163645123e-263	0.30747079212078	0.251	0.047	4.29595241243159e-259	2
Abr1	1.76651394092135e-262	0.41114847276688	0.487	0.159	3.57030132599614e-258	2
Kctd1	3.49230988357133e-261	0.361194279022343	0.315	0.075	7.05830750568601e-257	2
Epha7	6.81470927121074e-260	0.554720198650984	0.455	0.149	1.3773208908044e-255	2
5330417C22Rik1	3.65182807144647e-258	0.359805513219728	0.329	0.081	7.38070971520047e-254	2
Add2	2.5909089535923e-257	0.394635805660829	0.413	0.124	5.2364860861054e-253	2
Lrrfip11	6.33211336712748e-257	0.369116166934269	0.398	0.115	1.27978343263013e-252	2
Gabra4	5.00418106523477e-254	0.316007701056992	0.322	0.077	1.0113950350946e-249	2
Gpm6b	7.55276449752526e-254	0.367905670872935	0.642	0.251	1.52648923259483e-249	2
Gm15738	1.40513307107986e-253	0.378273349067387	0.347	0.092	2.8399144499595e-249	2
Sntb2	1.59227469785817e-253	0.381937721820729	0.335	0.086	3.21814639184114e-249	2
Runx2	2.3617361362022e-253	0.318388944883474	0.282	0.061	4.77330490487826e-249	2
Dab11	3.9905735612966e-250	0.877334966823398	0.82	0.585	8.06534822473657e-246	2
Nrcam	1.07136858691271e-248	0.592361525256324	0.811	0.459	2.16534305100928e-244	2
A830018L16Rik1	2.90844830108997e-248	0.429591549192555	0.374	0.104	5.87826486133294e-244	2
Adgrb1	5.19308915427905e-248	0.325700102383088	0.33	0.084	1.04957524897134e-243	2
Cntnap5b1	6.44901835072283e-248	0.486288462184561	0.372	0.102	1.30341109886459e-243	2
Grid11	1.06080586670243e-246	0.382922337581155	0.633	0.24	2.14399473719229e-242	2
Dgkb1	1.86230763787318e-246	0.631591596993739	0.547	0.21	3.76390996690548e-242	2
Tjp11	2.47741793683652e-246	0.512051565993758	0.698	0.315	5.00710939214029e-242	2
Adgrl21	7.28691474630321e-246	0.378797328016111	0.343	0.091	1.47275833937534e-241	2
Rgl1	3.2628526597064e-244	0.345247057035533	0.335	0.088	6.5945515105326e-240	2
Ptpn51	4.82243570218558e-244	0.323339109799102	0.294	0.069	9.74662479768727e-240	2
Zmat41	1.39294720285753e-243	0.542578158392245	0.361	0.101	2.81528559169536e-239	2
9630028H03Rik	2.66980310021739e-243	0.303745783103629	0.267	0.057	5.39593904584936e-239	2
Hdac91	6.92714874941104e-243	0.629573933041375	0.626	0.273	1.40004603374346e-238	2
Cacnb21	1.72816042394028e-242	0.644427533539384	0.527	0.197	3.49278503282571e-238	2
Csgalnact1	6.9919293117038e-240	0.347050892505164	0.316	0.079	1.41313883318846e-235	2
Galnt18	5.03213599149101e-237	0.375583813732375	0.387	0.114	1.01704500524025e-232	2
Wdr17	3.3935213249915e-235	0.382193510518256	0.409	0.125	6.85864594994032e-231	2
Rnf165	5.85271991446655e-235	0.287806830537797	0.274	0.062	1.18289322191283e-230	2
Baiap2	6.1021152152847e-235	0.345671892909023	0.35	0.097	1.23329850616119e-230	2
Gucy1a21	1.11151005839383e-234	0.442190862876972	0.513	0.192	2.24647297901977e-230	2
Hivep2	7.02070519454501e-234	0.638564848964586	0.851	0.581	1.41895472686949e-229	2
Tshz3	1.36324300143316e-233	0.357667972564412	0.328	0.087	2.75525043019656e-229	2
AC149090.11	4.99268228407915e-231	0.66452241513798	0.857	0.574	1.00907101643524e-226	2
Rtl41	6.74875677460553e-231	0.362485106562106	0.393	0.116	1.36399123171552e-226	2
Tspan13	7.51605589082628e-229	0.348047292718354	0.337	0.094	1.5190700560949e-224	2
Shisa91	3.7238911329006e-228	0.399748844823566	0.434	0.14	7.52635636870541e-224	2
Cpeb1	4.86100198826957e-228	0.334089882695774	0.331	0.09	9.82457111849163e-224	2
Ccdc148	4.1966640775314e-227	0.305610002187487	0.282	0.067	8.48187776709872e-223	2
Rapgef2	1.19006907700152e-226	0.507616035613515	0.624	0.284	2.40524861152777e-222	2
Prkca	4.76387440795417e-226	0.543649726170455	0.57	0.237	9.62826656591618e-222	2
Sh3rf3	1.37555053253294e-225	0.326310471533799	0.349	0.098	2.78012518130232e-221	2
Raph1	7.90486511824529e-222	0.401746367566287	0.421	0.142	1.59765228904856e-217	2
Aff31	9.46580177313026e-221	0.459877157665049	0.564	0.231	1.91313319636736e-216	2
Cacna1e	5.64346679266172e-219	0.584518242974603	0.769	0.418	1.14060107346486e-214	2
Gabrg31	1.69338206546674e-218	0.375845456209887	0.508	0.18	3.42249449251483e-214	2
Lncpint1	1.18483633542206e-216	0.559233713331115	0.801	0.495	2.39467271752153e-212	2
Adgrl31	8.61191633896723e-216	0.513604732733744	0.93	0.662	1.74055441126867e-211	2
Clstn2	5.93085870564771e-214	0.589255389628704	0.647	0.296	1.19868585299846e-209	2
Gm1976	7.72438670594747e-214	0.344488124435393	0.35	0.105	1.56117579713904e-209	2
Astn11	1.0588857290658e-213	0.419892193139867	0.52	0.206	2.14011394701489e-209	2
Slc17a7	2.07864770327613e-213	0.384488143382588	0.466	0.169	4.20115487309138e-209	2
Magi31	5.96267319647815e-213	0.402324506705919	0.385	0.125	1.2051158797402e-208	2
Nos1ap	6.88808440475261e-213	0.427290442003286	0.425	0.146	1.39215073904455e-208	2
Mdga21	4.86493421544435e-212	0.412246040295472	0.924	0.501	9.83251854283458e-208	2
Tusc3	1.7671908840933e-210	0.346639177549601	0.38	0.121	3.57166949584098e-206	2
Fam49a	5.19688153910194e-210	0.27043211288346	0.272	0.067	1.05034172786789e-205	2
Fbxw7	2.90699462699742e-209	0.421181688768184	0.493	0.194	5.87532684062448e-205	2
Faah	1.4536689763282e-208	0.263541599715328	0.259	0.062	2.93801036805692e-204	2
Zeb2	5.76741829894549e-207	0.331504171987482	0.56	0.209	1.16565291239987e-202	2
Nptn	5.3478476574636e-205	0.498272052014721	0.74	0.404	1.08085349004997e-200	2
Sptbn2	8.15021184005367e-205	0.305306220387545	0.313	0.088	1.64723931499325e-200	2
Tacc1	6.9257000146854e-203	0.385634083390416	0.407	0.141	1.39975322996807e-198	2
Mapk4	1.26980918160011e-202	0.347970845175946	0.355	0.109	2.56641133693199e-198	2
Celf5	7.29298632608138e-202	0.270383843467862	0.27	0.068	1.47398546636431e-197	2
Dscam1	9.91484124564e-201	0.393708443289509	0.671	0.303	2.0038885641563e-196	2
Pak31	2.54079084259236e-199	0.369399222601148	0.43	0.151	5.13519237196343e-195	2
Mast4	5.25244759481691e-198	0.285249291467968	0.613	0.256	1.06157218338845e-193	2
Man1a	1.10984402831202e-197	0.396427921649345	0.271	0.07	2.24310576562141e-193	2
Pdzd2	6.90231768489433e-196	0.33183993606659	0.295	0.082	1.39502742729399e-191	2
Sox5	8.64180454934761e-196	0.458175247859594	0.424	0.146	1.74659511746865e-191	2
Ano3	4.18714986056027e-195	0.454876490448587	0.493	0.199	8.46264858317837e-191	2
Gabrb11	9.43973428449014e-195	0.280421190616087	0.712	0.336	1.9078646962383e-190	2
Tox	2.99636761583451e-193	0.686383608606266	0.344	0.112	6.05595858836313e-189	2
Il1rapl1	3.26593920510695e-193	0.720918021504428	0.964	0.882	6.60078972744166e-189	2
Arpp19	4.92317541486061e-192	0.268800778739034	0.253	0.063	9.95022983097478e-188	2
Sort1	7.08920993809116e-190	0.310776498641536	0.344	0.109	1.4328002205876e-185	2
Slc16a7	1.91334246249665e-189	0.328701242734431	0.366	0.121	3.86705645095199e-185	2
Cacna1b1	1.52843970454296e-188	0.391819262710699	0.519	0.218	3.08912948685178e-184	2
Snca	2.83402886170864e-188	0.328798072977038	0.324	0.099	5.72785573239933e-184	2
Meis2	4.25152691004216e-188	0.295047605806286	0.302	0.084	8.59276103788622e-184	2
Csmd31	8.8799972952165e-188	0.527622763342575	0.874	0.571	1.79473625333621e-183	2
Sh3rf1	6.06764603077509e-187	0.31543898292776	0.3	0.087	1.22633193927995e-182	2
Slc4a10	6.26712546900679e-187	0.449949660995779	0.717	0.382	1.26664872854096e-182	2
Pknox2	9.72375852494144e-187	0.359932664244046	0.369	0.126	1.96526883547591e-182	2
Satb1	6.92931661310749e-186	0.350008661799818	0.295	0.086	1.40048418067516e-181	2
Ext1	1.51864884004727e-183	0.595116768388541	0.718	0.409	3.06934117061953e-179	2
Rap1gap2	1.38608541154315e-182	0.320411510207957	0.356	0.118	2.80141722526986e-178	2
Tmem178b1	2.17715176366005e-182	0.499961137840529	0.805	0.504	4.40024142953332e-178	2
Brd9	2.86573761919795e-182	0.384355743525579	0.399	0.147	5.79194230216097e-178	2
C78859	3.20935211859285e-181	0.284605732612289	0.291	0.084	6.48642156688801e-177	2
Myt1l1	4.73008273575716e-180	0.466189544196225	0.786	0.473	9.55997021723881e-176	2
Elmod1	5.07854574513315e-179	0.366061706927965	0.442	0.172	1.02642488054886e-174	2
Mboat2	1.1046277943858e-178	0.288358571456431	0.326	0.102	2.23256323523314e-174	2
Mical2	1.23392593181312e-177	0.434292702676547	0.531	0.241	2.49388770078749e-173	2
Rian1	4.95579255679333e-177	0.464208720934991	0.865	0.557	1.0016152336535e-172	2
2210408F21Rik1	8.86589155268318e-177	0.313809300062306	0.345	0.115	1.7918853417128e-172	2
Pdzrn41	1.09600898371501e-176	0.445166745268822	0.368	0.127	2.2151437569864e-172	2
Susd4	8.06072896052851e-176	0.333877048585669	0.364	0.127	1.62915393021242e-171	2
Tnr	4.86445082279046e-175	0.341041013269188	0.556	0.249	9.8315415579418e-171	2
Arhgap20	6.30585876091892e-175	0.272766862306522	0.274	0.078	1.27447711416932e-170	2
Rnf150	6.7126488048113e-174	0.342076340270167	0.388	0.141	1.35669344994041e-169	2
Dlgap3	7.17105849747469e-174	0.306261596467921	0.325	0.105	1.44934263292461e-169	2
Macrod21	8.88225457007483e-174	0.523186611198666	0.947	0.761	1.79519247115782e-169	2
Lmtk2	2.0089034036173e-173	0.352363371169606	0.373	0.135	4.06019466905092e-169	2
Ube2e2	7.80446311887031e-173	0.495794972359647	0.797	0.512	1.57736004095488e-168	2
Gabrb31	1.5552672106061e-172	0.493817201922893	0.843	0.576	3.14335055935598e-168	2
Cadm2	3.11328038639567e-172	0.573407947441539	0.98	0.956	6.29225098894429e-168	2
Prkag2	1.24439376205124e-171	0.387543136829899	0.452	0.186	2.51504423248176e-167	2
Abi2	1.65708787524887e-170	0.412547928780016	0.552	0.26	3.34914030466548e-166	2
Gabbr2	5.69215111245526e-170	0.423819858951306	0.637	0.327	1.15044066133833e-165	2
Frmd4a1	6.62215275358795e-170	0.326048164590135	0.806	0.443	1.33840329302766e-165	2
Xkr41	1.09686980612811e-169	0.465824485858223	0.833	0.531	2.21688356516552e-165	2
Ptprs1	1.64031277765848e-169	0.399904663894861	0.578	0.278	3.31523615492556e-165	2
Sobp	9.37153582669648e-169	0.432992143216923	0.569	0.274	1.89408110593363e-164	2
Cdkl5	2.01566002687325e-168	0.395354302303736	0.484	0.21	4.07385048031353e-164	2
Arl15	3.90267643528847e-168	0.499464032407285	0.659	0.355	7.88769934336153e-164	2
Hace1	4.99673039037725e-168	0.351937813295372	0.409	0.158	1.00988917919915e-163	2
Dlg1	2.77473318393579e-167	0.528104280458422	0.762	0.482	5.60801323805263e-163	2
Cmip1	4.55015676540657e-167	0.340657897587574	0.44	0.176	9.19632183856322e-163	2
Dpy19l1	9.55731975280285e-167	0.28607741637765	0.26	0.073	1.93162989523898e-162	2
Rasgef1a	1.1393686025321e-166	0.366990380078855	0.457	0.192	2.30277788257763e-162	2
Foxp1	4.87869907595126e-166	0.509372594510668	0.679	0.385	9.8603387024051e-162	2
Aopep	5.08355955537149e-165	0.459721064499822	0.566	0.284	1.02743822173613e-160	2
Pitpnm2	1.32359928795424e-164	0.278248393301788	0.286	0.087	2.67512652088432e-160	2
Mapk10	9.5358623218677e-163	0.486381740598179	0.823	0.577	1.92729313387268e-158	2
Hs3st41	1.04454431841516e-162	0.369583761624049	0.315	0.1	2.11112852194887e-158	2
Actr3b	1.18675785931161e-162	0.260274758663602	0.286	0.087	2.3985563094547e-158	2
Rgs7	8.90753341012285e-162	0.561283584335588	0.841	0.624	1.80030157751993e-157	2
Dcc1	1.90989415229012e-161	0.538332362191128	0.549	0.252	3.86008707119356e-157	2
Cit1	1.93702308530562e-161	0.364862215478396	0.482	0.206	3.9149173577112e-157	2
Mgat5	2.92707789363699e-160	0.333878641135825	0.394	0.151	5.91591713082972e-156	2
Slc9a9	4.31625963841243e-160	0.410268992642518	0.464	0.201	8.72359235519536e-156	2
Pde7b	4.42897479960982e-158	0.316063262239376	0.327	0.11	8.9514009674914e-154	2
Osbpl1a	4.47799237599966e-158	0.326239462962248	0.369	0.138	9.05047039113292e-154	2
Mmp161	1.37684669202679e-157	0.416985064734129	0.599	0.297	2.78274484925534e-153	2
Alcam1	2.76089731498324e-157	0.386693202474539	0.47	0.198	5.58004956331262e-153	2
Slc8a1	1.51820590272071e-156	0.536866024064553	0.785	0.497	3.06844594998882e-152	2
Sorcs31	1.79096561562332e-156	0.293890771172526	0.376	0.136	3.6197206057363e-152	2
Ttc7b	1.82986187474252e-156	0.370349539577721	0.491	0.222	3.69833383504211e-152	2
Samd12	3.78497740790285e-156	0.472781735500063	0.757	0.469	7.64981783911245e-152	2
Spred1	7.32597774040692e-156	0.396044391034056	0.434	0.184	1.48065336111364e-151	2
B3galt1	4.67130976376714e-155	0.451130814937826	0.758	0.457	9.44118416354976e-151	2
Ablim2	5.05184850460888e-155	0.276604221568965	0.315	0.107	1.0210291012665e-150	2
Camk1d	2.60124527037119e-154	0.440250732224429	0.741	0.452	5.25737681594721e-150	2
Rasgef1b1	1.13962625118137e-152	0.362580213017742	0.392	0.154	2.30329861626267e-148	2
Efr3a	3.27935343161718e-152	0.384222524536529	0.36	0.138	6.62790122064149e-148	2
Zfp804b1	1.50013004315294e-150	0.612924202444118	0.354	0.13	3.03191283021642e-146	2
Grm3	3.56767292822277e-150	0.344321890148551	0.429	0.172	7.21062375523104e-146	2
Unc791	2.24154273917867e-149	0.386065212315052	0.625	0.328	4.53038203015402e-145	2
Syt7	3.00364756014244e-149	0.33348448812372	0.435	0.184	6.07067208380389e-145	2
Sidt1	4.5150645462879e-149	0.343322708004393	0.422	0.176	9.12539695450247e-145	2
Arap2	2.05982949250799e-148	0.29461040691976	0.323	0.111	4.1631213873079e-144	2
Arhgap10	5.79126235560991e-148	0.298750426867186	0.31	0.107	1.17047203469232e-143	2
Vps13a	2.92598974067103e-147	0.404999262582118	0.599	0.312	5.91371786487022e-143	2
Pigk	8.15364731029314e-147	0.343662590444593	0.32	0.115	1.64793365788335e-142	2
Il1rap	1.95033380516868e-146	0.26908549993648	0.313	0.106	3.94181965362642e-142	2
D430041D05Rik1	3.03801123327348e-146	0.398384671827377	0.64	0.342	6.14012450356903e-142	2
Man1a2	2.59984242773225e-144	0.358999754896533	0.403	0.169	5.25454153068965e-140	2
A830082K12Rik	9.05977570486778e-144	0.274775037137509	0.299	0.102	1.83107126771083e-139	2
Mtmr12	3.29945051557374e-142	0.250320531305804	0.263	0.083	6.66851943702609e-138	2
Pkig	4.97807932375709e-141	0.274353197316713	0.307	0.108	1.00611961212455e-136	2
Ryr21	1.12583385133424e-140	0.46147981504101	0.865	0.635	2.27542279693163e-136	2
Scn3a1	1.73871950144507e-140	0.252814738659849	0.306	0.106	3.51412598437064e-136	2
Dcaf6	7.8038128822356e-140	0.369462115611467	0.466	0.216	1.57722862162864e-135	2
Dlgap4	4.96922179078798e-138	0.286530418428521	0.336	0.127	1.00432941613616e-133	2
Ccdc88a1	7.83483108156905e-136	0.315762946912911	0.608	0.3	1.58349770989592e-131	2
Adcy9	1.81874892710906e-135	0.380108917650158	0.474	0.226	3.67587345658013e-131	2
Nsf1	4.70879770724356e-135	0.371266277203393	0.582	0.308	9.51695104610996e-131	2
Reps2	9.16528796195389e-135	0.31782652285636	0.415	0.179	1.8523963499905e-130	2
Rgs7bp	3.48893933736409e-134	0.358931098709821	0.567	0.287	7.05149529474657e-130	2
Cyfip2	1.04931270110604e-133	0.317843380724794	0.479	0.225	2.12076590020541e-129	2
Kcnj6	4.26143828637092e-133	0.318222495370889	0.461	0.211	8.61279292058427e-129	2
Btbd10	7.67976946395273e-133	0.279153961960349	0.347	0.135	1.55215820635949e-128	2
Jazf11	8.47231321668349e-132	0.317357675715956	0.443	0.199	1.7123392242239e-127	2
Brinp11	9.41091436930361e-132	0.472984092373304	0.752	0.47	1.90203990317995e-127	2
Apba2	1.11004099256518e-131	0.368575083218534	0.605	0.326	2.24350385007349e-127	2
Ntrk2	1.14199993890776e-131	0.484139609453784	0.715	0.465	2.30809607652648e-127	2
C130071C03Rik	1.54533813071787e-131	0.351370225205714	0.575	0.299	3.12328289599389e-127	2
Nbea	2.00126926620597e-131	0.401266890129355	0.918	0.775	4.04476531392888e-127	2
Ccdc85a1	6.88176931750094e-131	0.258793704285749	0.38	0.151	1.39087439676011e-126	2
Atp2c1	9.03694428567718e-131	0.339062876268885	0.481	0.231	1.82645680957821e-126	2
Fmn1	2.81784704054402e-130	0.285955431742384	0.327	0.124	5.69515065364352e-126	2
Ryr31	1.15136562713347e-128	0.456066192943573	0.427	0.194	2.32702506899946e-124	2
Gpc61	1.37186158357659e-128	0.468313921002277	0.417	0.182	2.77266944656666e-124	2
Dync1i2	2.24611238397728e-128	0.358295798643078	0.574	0.304	4.53961773925648e-124	2
Pcnx2	3.87212707708202e-128	0.270012597293065	0.321	0.123	7.82595603549048e-124	2
Cdk17	4.19240396061263e-128	0.354973133231759	0.53	0.272	8.47326764479419e-124	2
Ndrg4	1.42854271148041e-127	0.250611111663594	0.3	0.11	2.88722767417306e-123	2
Mark1	4.15595405229273e-127	0.266958622787727	0.298	0.11	8.39959873508885e-123	2
Strbp	5.29017195701299e-126	0.398624757566351	0.858	0.646	1.0691966542319e-121	2
Serpini1	8.22745467715061e-126	0.278783468801065	0.311	0.117	1.66285086479891e-121	2
Cux2	1.55229693577059e-124	0.361944633230258	0.336	0.14	3.13734733688594e-120	2
Esyt2	4.93076962672116e-124	0.334412504208681	0.496	0.246	9.96557849256614e-120	2
Pgbd5	1.16178012587136e-123	0.263013994220844	0.321	0.125	2.34807381239861e-119	2
Pak7	8.39933005185264e-123	0.385072247896869	0.617	0.351	1.69758859677994e-118	2
Mrtfa	1.71949317051921e-122	0.258621668534092	0.356	0.146	3.47526764693638e-118	2
Ppme1	9.11076348291048e-122	0.305841844498402	0.306	0.119	1.84137640753104e-117	2
Sv2b1	4.92181751689282e-121	0.338909099832932	0.555	0.289	9.94748538339207e-117	2
Gls	4.68242047805559e-118	0.355252928281172	0.724	0.447	9.46364002819816e-114	2
Lrp1b1	7.79515917772364e-118	0.522838847473945	0.886	0.703	1.57547962140973e-113	2
Scn8a	2.41840099144243e-117	0.336210352188383	0.637	0.363	4.88783024380431e-113	2
Tnrc6c1	5.81249976505742e-117	0.336603091686289	0.662	0.384	1.17476432751575e-112	2
Arntl	3.49463663321338e-116	0.253775500710802	0.302	0.117	7.06301009938757e-112	2
Hecw2	3.25199260773752e-115	0.409805046039836	0.719	0.46	6.57260225949831e-111	2
Ank31	5.07463080494203e-115	0.366996851595477	0.932	0.781	1.02563363198683e-110	2
Nol4	8.42802069225196e-114	0.375422681587942	0.546	0.3	1.70338726211104e-109	2
Atxn1	1.80015288977874e-113	0.405636805384727	0.768	0.534	3.6382890055318e-109	2
Pi4ka	7.26218092114884e-113	0.328013968221335	0.562	0.31	1.46775938597339e-108	2
Dock3	3.62125554828043e-112	0.402383999727506	0.814	0.621	7.31891958862957e-108	2
Ppp1r12a	1.20178000063189e-111	0.332619499034424	0.552	0.304	2.4289175592771e-107	2
Cdr1os1	1.95749863191082e-110	0.353043910066893	0.792	0.533	3.95630048495496e-106	2
Tnpo1	1.12751225359463e-109	0.279645015609771	0.388	0.178	2.2788150157401e-105	2
Bc11	1.51578874775113e-109	0.309489705758912	0.582	0.315	3.06356063807981e-105	2
2210408I21Rik1	2.42325846393475e-108	0.299107633700259	0.441	0.215	4.89764768145853e-104	2
Reep11	7.97970496618613e-108	0.257498672884919	0.341	0.146	1.61277817071588e-103	2
Calm2	8.28058640538803e-108	0.333581922173471	0.486	0.257	1.67358931839297e-103	2
Plxna2	1.03852454305294e-107	0.260852419780224	0.367	0.162	2.09896195396429e-103	2
Stxbp6	1.52266602560772e-107	0.280785431800718	0.267	0.099	3.07746030435576e-103	2
Syt14	1.2864855024321e-106	0.263419095972992	0.35	0.154	2.60011584896552e-102	2
Calm1	1.32785807923881e-106	0.319168795003533	0.482	0.253	2.68373396394956e-102	2
Lrrk2	1.61020866089427e-105	0.2538428490347	0.291	0.115	3.25439272453341e-101	2
Pcdh9	2.9220204149293e-105	0.418516671321284	0.979	0.949	5.9056954606136e-101	2
Olfm1	5.97121366255866e-105	0.262864331631104	0.355	0.158	1.20684199333973e-100	2
Ctnnd1	8.57849691950411e-105	0.262018633359283	0.292	0.117	1.73380001240098e-100	2
Sptbn1	1.34168448183313e-104	0.31434521826724	0.613	0.358	2.71167850623294e-100	2
Gfod1	1.48549276143295e-104	0.252468333056389	0.362	0.161	3.00232942013213e-100	2
Sorcs11	2.89657477565473e-104	0.346598851217438	0.412	0.193	5.85426727907578e-100	2
Mapk1	1.52735694166688e-103	0.266703704832074	0.395	0.187	3.08694111480293e-99	2
Slc35f41	8.43685311219291e-103	0.273301565644748	0.369	0.166	1.70517238250531e-98	2
Atp9b	1.07649491356023e-101	0.287231898676073	0.451	0.23	2.17570386979658e-97	2
Ptprt1	1.18955570513499e-101	0.345068323133086	0.607	0.336	2.40421103564833e-97	2
Kcnh11	1.30972970483322e-101	0.345696765408402	0.449	0.235	2.64709470643841e-97	2
Dlgap11	2.02601352129358e-101	0.348154253834364	0.98	0.868	4.09477592788645e-97	2
Fry	3.85237900911782e-101	0.284571492152355	0.668	0.403	7.78604321532803e-97	2
Auts2	2.3585918922508e-100	0.367486337934256	0.963	0.837	4.7669500734281e-96	2
Grin1	2.50669529885163e-100	0.328070562346517	0.681	0.423	5.06628186850903e-96	2
Herc3	3.35219795285206e-100	0.281492671817375	0.404	0.197	6.77512728250931e-96	2
Ppp1r9a	8.34032842820006e-100	0.301482291268989	0.571	0.325	1.68566377862351e-95	2
Mical3	2.80905712777738e-99	0.331799239885732	0.536	0.307	5.67738536095087e-95	2
Zswim6	7.01746623720159e-99	0.256215382979658	0.41	0.197	1.41830010120081e-94	2
Kcnq1ot11	2.74573553365253e-98	0.302944066298518	0.597	0.345	5.54940608706512e-94	2
Fam155a1	4.12336886793244e-98	0.357593100038128	0.952	0.784	8.33374081897826e-94	2
Atf6	7.38955174164256e-98	0.255433617697593	0.312	0.135	1.49350230250338e-93	2
R3hdm2	7.64335838879265e-98	0.334739957595976	0.54	0.309	1.54479916395888e-93	2
Hs2st1	6.98575457220565e-97	0.259620513257332	0.383	0.182	1.41189085658848e-92	2
Cadm11	3.77863758586104e-95	0.488933981828851	0.795	0.623	7.63700442478375e-91	2
Evi5	2.95013242723447e-94	0.275665018309302	0.385	0.189	5.96251264868359e-90	2
Ppp3ca1	3.12749311530429e-94	0.352591666338413	0.909	0.767	6.32097633534149e-90	2
Fmn2	5.01793357680875e-94	0.258950441235224	0.542	0.298	1.01417455520882e-89	2
Psd3	7.56718750103742e-94	0.308982719022931	0.567	0.33	1.52940426583467e-89	2
Rasgrf11	2.29722150449359e-93	0.304823996205184	0.547	0.309	4.64291438273199e-89	2
Atp2b2	3.01143714292289e-92	0.344322360476461	0.614	0.384	6.08641560956145e-88	2
Dnajc1	3.3538234398095e-91	0.287431793381361	0.522	0.291	6.77841255419898e-87	2
Dennd4a	2.39455189764994e-90	0.256594797372506	0.456	0.24	4.83962884034029e-86	2
Arid5b	1.19070818076281e-89	0.255369951738831	0.345	0.163	2.40654030413972e-85	2
Me3	1.77544015376848e-89	0.258154987668833	0.34	0.158	3.58834209478148e-85	2
Acap2	2.20070490943272e-89	0.27923828141453	0.457	0.245	4.44784469245448e-85	2
Numb	4.27570511942656e-89	0.292699689279687	0.459	0.249	8.64162761687301e-85	2
Adgrb3	4.45207067099208e-89	0.300859537204817	0.991	0.925	8.99808003314209e-85	2
Ncam21	1.43992555523772e-88	0.577445363654512	0.666	0.47	2.91023353969095e-84	2
Hivep3	1.86008658911684e-88	0.304338715538178	0.585	0.352	3.75942100526405e-84	2
Trim2	2.43229319557218e-88	0.298653357075188	0.542	0.318	4.91590777757094e-84	2
Focad1	6.23920102695258e-88	0.314917983563814	0.485	0.272	1.26100491955739e-83	2
Ppfia2	3.18739949457063e-87	0.375133739951342	0.791	0.599	6.44205311847669e-83	2
Sgcd1	3.48306335021816e-87	0.337955316800162	0.375	0.179	7.03961933712592e-83	2
Tcf201	4.18128293184726e-87	0.2544040887657	0.422	0.219	8.45079093355649e-83	2
Ndfip1	2.65722882686062e-86	0.288609142189854	0.429	0.23	5.37052518196799e-82	2
Arfgef3	8.75310919939518e-86	0.277025798715301	0.446	0.242	1.76909090028976e-81	2
Ctnna21	1.31098965691924e-84	0.38357126475128	0.9	0.74	2.64964119559947e-80	2
Gm20275	2.05641794964159e-84	0.259292169647336	0.357	0.176	4.15622631802062e-80	2
Fgf12	1.2799640373529e-82	0.322376054064377	0.944	0.821	2.58693531589395e-78	2
Akap61	1.32291108931966e-82	0.298673023231735	0.758	0.543	2.67373560262397e-78	2
Arglu11	1.36054288335474e-82	0.257075584366702	0.524	0.302	2.74979322154827e-78	2
Cpeb3	1.75964666904178e-82	0.328111085094517	0.63	0.402	3.55642188280034e-78	2
Prr16	1.76442453611698e-82	0.455669249839271	0.452	0.258	3.56607842994602e-78	2
Clstn1	4.05819879490441e-82	0.252941519511736	0.414	0.22	8.2020255843813e-78	2
Gm15155	2.51152069334397e-81	0.259851914579376	0.267	0.115	5.07603447331749e-77	2
Grik41	1.13796595719971e-80	0.264585546790072	0.256	0.109	2.29994299609633e-76	2
Cpeb4	2.70642581423955e-80	0.272566960153415	0.482	0.275	5.46995721315956e-76	2
Map1b1	2.80763455827112e-79	0.285193239741162	0.628	0.396	5.67451020572176e-75	2
Mbnl2	1.77771691194332e-78	0.286454598840918	0.62	0.393	3.59294365072864e-74	2
Srpk2	1.97030910524653e-78	0.253600989128896	0.58	0.35	3.98219173261376e-74	2
Dip2c1	1.85709827593906e-76	0.2719909326039	0.762	0.541	3.75338132550044e-72	2
Ssbp21	1.12196383004462e-74	0.267637880933319	0.553	0.333	2.26760109690319e-70	2
Pde4dip	1.67723397359784e-74	0.251769347199856	0.553	0.335	3.38985758403859e-70	2
Rtn31	1.25296846426227e-72	0.250053002905645	0.643	0.414	2.53237456312048e-68	2
Plekha5	3.08946928698848e-72	0.265660967811766	0.678	0.451	6.24412637593241e-68	2
Phf20l1	1.18756809365272e-71	0.291408064256871	0.606	0.399	2.40019387408152e-67	2
Myo5a	3.51376990513493e-71	0.255690566223073	0.534	0.329	7.1016803552682e-67	2
Osbpl8	7.73657781979511e-69	0.25230325750555	0.405	0.225	1.56363974315879e-64	2
Kcnip41	3.44902552458207e-68	0.272669833446691	0.981	0.833	6.97082548773283e-64	2
Anks1b	1.31744111039388e-67	0.253661472269846	0.981	0.887	2.66268022821706e-63	2
Cntn4	1.7838958036835e-67	0.411596190618922	0.753	0.615	3.60543180882472e-63	2
Kcnab1	1.80669372760145e-66	0.3078649154345	0.363	0.199	3.6515086928553e-62	2
Ttc31	2.24387466539594e-66	0.260589847921376	0.847	0.662	4.53509508623173e-62	2
Tspan5	1.75929385538109e-63	0.30295405686956	0.666	0.471	3.55570881111072e-59	2
Prkcb1	4.73931410232106e-58	0.262285254183955	0.731	0.538	9.57862773220109e-54	2
Rfx3	1.17604465109049e-57	0.426886949532094	0.478	0.318	2.37690384431898e-53	2
Akt3	1.84895212306548e-57	0.262273146749284	0.852	0.704	3.73691713592763e-53	2
Cacnb41	6.46360654972196e-50	0.260519449453804	0.766	0.591	1.3063595197643e-45	2
Celf41	6.04418941355736e-46	0.25862631473502	0.618	0.442	1.22159112237408e-41	2
Robo11	4.40604902597264e-44	0.302433139809743	0.547	0.399	8.90506568639329e-40	2
Ntng11	5.68333265762941e-39	0.340659006545722	0.37	0.236	1.14865836343348e-34	2
Brinp31	1.87743143421334e-25	0.52236655916939	0.554	0.481	3.79447667168857e-21	2
Trps1	2.79703619545551e-18	0.278393622437824	0.346	0.255	5.65308985463513e-14	2
Plp1	0	3.25862324353868	0.985	0.049	0	3
Mbp	0	3.22049563950506	0.979	0.074	0	3
Nkain22	0	2.85122277664501	0.998	0.444	0	3
Plcl1	0	2.72942671729054	0.967	0.198	0	3
St18	0	2.68355960276188	0.977	0.278	0	3
Slc24a2	0	2.62180141820547	0.966	0.236	0	3
Edil3	0	2.54033997439939	0.964	0.197	0	3
Qk	0	2.47835391260724	0.982	0.284	0	3
Pde4b	0	2.45467603126168	0.998	0.694	0	3
Fth1	0	2.38376497103253	0.914	0.224	0	3
Dock10	0	2.32650532023559	0.926	0.099	0	3
Prr5l	0	2.14184775533675	0.856	0.011	0	3
Phlpp1	0	2.13766445238535	0.939	0.257	0	3
Tmeff2	0	2.13113571485595	0.955	0.423	0	3
Rnf220	0	2.12090500042779	0.84	0.074	0	3
Ptgds	0	2.11434033940695	0.551	0.039	0	3
Mast41	0	2.05548742709692	0.905	0.241	0	3
St6galnac3	0	1.93369531807903	0.877	0.224	0	3
Pex5l1	0	1.92829588663433	0.844	0.173	0	3
2022-09-07	0	1.92609980694599	0.894	0.256	0	3
Frmd5	0	1.89250287732878	0.949	0.446	0	3
Zeb21	0	1.76132462692452	0.87	0.193	0	3
Enpp2	0	1.66165065995335	0.828	0.065	0	3
Trf	0	1.6533673352518	0.764	0.021	0	3
Map7	0	1.6342963569755	0.842	0.234	0	3
Mobp	0	1.63124825544034	0.748	0.011	0	3
Prickle21	0	1.58786806888529	0.816	0.213	0	3
Ano4	0	1.50805876845777	0.754	0.126	0	3
Apod	0	1.50071358421893	0.686	0.017	0	3
Magi2	0	1.48993296668126	0.998	0.897	0	3
Gm16168	0	1.46461608067698	0.665	0.033	0	3
Aplp1	0	1.40922103575563	0.718	0.122	0	3
Aspa	0	1.40182228194815	0.704	0.009	0	3
Mag	0	1.38521688045115	0.729	0.009	0	3
Cdk19	0	1.37040825009805	0.741	0.168	0	3
D7Ertd443e	0	1.35817251998082	0.667	0.008	0	3
Erbin	0	1.34829824974616	0.699	0.102	0	3
Neat1	0	1.32831783105738	0.676	0.042	0	3
Sox2ot	0	1.28424284960981	0.776	0.095	0	3
Mog	0	1.27625553318416	0.677	0.006	0	3
Ctnna3	0	1.27185477185923	0.791	0.431	0	3
Tbc1d5	0	1.26331834771484	0.776	0.275	0	3
Adipor2	0	1.25470571706613	0.58	0.064	0	3
Ugt8a	0	1.24158914471579	0.658	0.017	0	3
Cdh20	0	1.23708393054837	0.669	0.13	0	3
Rtn4	0	1.22938318583205	0.69	0.17	0	3
Gatm	0	1.22906465299307	0.677	0.032	0	3
Pcdh91	0	1.21604379099661	0.999	0.949	0	3
Cdh19	0	1.20657566930552	0.593	0.016	0	3
Scd2	0	1.20379424351562	0.654	0.117	0	3
Zfp536	0	1.19376809020224	0.785	0.342	0	3
Grm31	0	1.19339149947244	0.654	0.16	0	3
A230001M10Rik	0	1.1759256449313	0.584	0.004	0	3
Car2	0	1.15456390475068	0.606	0.02	0	3
1700047M11Rik	0	1.14606199068721	0.626	0.028	0	3
Lrp1b2	0	1.13906164885938	0.981	0.7	0	3
Gjc3	0	1.13601106650515	0.634	0.03	0	3
Plxdc2	0	1.12810672315845	0.741	0.187	0	3
Vmp1	0	1.12784751701325	0.677	0.176	0	3
Kif13b	0	1.11281321266213	0.669	0.16	0	3
Arhgap23	0	1.10585216009134	0.653	0.08	0	3
4930420G21Rik	0	1.10372431744623	0.523	0.005	0	3
Slc12a2	0	1.10339679636351	0.677	0.193	0	3
Sec14l5	0	1.0801748414631	0.595	0.005	0	3
Ptprk1	0	1.06149944291163	0.677	0.162	0	3
Ppp1r16b	0	1.05702189693499	0.57	0.053	0	3
Pak71	0	1.05599462679896	0.757	0.346	0	3
Anln	0	1.04672655969184	0.535	0.008	0	3
Frmd4b	0	1.0368556142757	0.626	0.103	0	3
Klhl2	0	1.02925548486805	0.627	0.123	0	3
Fnbp1	0	1.00015647191893	0.839	0.488	0	3
Gab1	0	0.973579455090555	0.555	0.043	0	3
Ppp2r3a	0	0.966845656129883	0.605	0.223	0	3
Rab31	0	0.962648387973212	0.541	0.107	0	3
Pde8a	0	0.961208123452703	0.535	0.014	0	3
Ypel2	0	0.958035228505748	0.574	0.123	0	3
Cdc37l1	0	0.955833735429062	0.643	0.181	0	3
Myo1d	0	0.936874827015365	0.523	0.052	0	3
Grik11	0	0.922666263792097	0.495	0.111	0	3
Zdhhc20	0	0.902869753044405	0.569	0.175	0	3
Tspan2	0	0.901946182241921	0.494	0.016	0	3
Pak1	0	0.897617115448469	0.623	0.23	0	3
Mal	0	0.896993340676238	0.504	0.005	0	3
Ttll7	0	0.88858020660437	0.596	0.161	0	3
Ankrd28	0	0.884319278783595	0.647	0.257	0	3
Sytl2	0	0.877757490330861	0.454	0.048	0	3
Gpm6b1	0	0.867470020468905	0.69	0.257	0	3
Pard3	0	0.864920860731653	0.6	0.192	0	3
Sorcs12	0	0.86433877897182	0.625	0.181	0	3
Plekhh1	0	0.855474545131408	0.522	0.021	0	3
Usp54	0	0.849806295230447	0.542	0.106	0	3
Lrmda	0	0.848679688109819	0.429	0.059	0	3
Pip4k2a	0	0.847103062290729	0.529	0.121	0	3
Bcas1	0	0.839145328357276	0.482	0.013	0	3
C030029H02Rik	0	0.828760036211033	0.442	0.004	0	3
Slain1	0	0.824538117052083	0.488	0.078	0	3
Grb14	0	0.814834842799089	0.46	0.056	0	3
Aatk	0	0.811955067117475	0.551	0.133	0	3
Il1rap1	0	0.802411985441023	0.519	0.095	0	3
Slc25a13	0	0.786769300440535	0.427	0.03	0	3
Agmo	0	0.780226255574896	0.391	0.027	0	3
Rnf13	0	0.774895244621313	0.536	0.136	0	3
Rffl	0	0.771724365842913	0.459	0.055	0	3
Cldn11	0	0.770877953680042	0.449	0.005	0	3
Dip2a	0	0.767801883274801	0.518	0.125	0	3
Usp31	0	0.764207311179025	0.48	0.106	0	3
Otud7b	0	0.76376527177116	0.489	0.117	0	3
Pstpip2	0	0.759855102417782	0.433	0.02	0	3
Litaf	0	0.75242913605114	0.45	0.013	0	3
Phldb1	0	0.748218673337879	0.475	0.039	0	3
Hipk2	0	0.746902651837501	0.55	0.169	0	3
Arhgef10	0	0.742666940823819	0.477	0.032	0	3
Gm19500	0	0.72032737332378	0.443	0.003	0	3
Elovl7	0	0.71845216169814	0.416	0.029	0	3
2022-09-04	0	0.708071289128684	0.49	0.094	0	3
Glul	0	0.702938746950897	0.447	0.052	0	3
A330049N07Rik	0	0.700669183947689	0.37	0.003	0	3
Ptprd1	0	0.689774905262041	0.997	0.855	0	3
Fa2h	0	0.688152970393947	0.428	0.008	0	3
Dock1	0	0.687635225266423	0.467	0.068	0	3
Tmeff1	0	0.683576137002404	0.403	0.048	0	3
Pacs2	0	0.673325080922158	0.447	0.079	0	3
Rap1a	0	0.666456841274732	0.428	0.098	0	3
Plekhg1	0	0.658841709288083	0.424	0.041	0	3
Cipc	0	0.657787549157948	0.471	0.126	0	3
Synj2	0	0.638030343457133	0.399	0.044	0	3
Rcbtb1	0	0.638006132262315	0.412	0.065	0	3
Tubb4a	0	0.629431401966907	0.44	0.1	0	3
Abca8a	0	0.617587197285605	0.344	0.006	0	3
Kctd3	0	0.611183008856131	0.377	0.07	0	3
Stard13	0	0.599360548079092	0.387	0.064	0	3
Stxbp61	0	0.589755101848944	0.41	0.092	0	3
Cnp	0	0.585656694799066	0.377	0.024	0	3
Igsf11	0	0.570683006261003	0.356	0.05	0	3
Arrdc3	0	0.561372208153559	0.339	0.033	0	3
Pls1	0	0.560978546421815	0.344	0.043	0	3
Smad7	0	0.559366998802667	0.374	0.056	0	3
4930511M06Rik	0	0.555232514083196	0.351	0.013	0	3
Mast31	0	0.554110915142559	0.353	0.054	0	3
Ttyh2	0	0.551287753597292	0.406	0.069	0	3
Ndst4	0	0.542272898161404	0.335	0.047	0	3
Clmn	0	0.533646815871975	0.327	0.049	0	3
Jam3	0	0.529369035745865	0.358	0.072	0	3
Stmn4	0	0.526375772799617	0.354	0.032	0	3
Hcn2	0	0.522854940438215	0.323	0.046	0	3
Pik3c2b	0	0.522806318515989	0.348	0.041	0	3
Dpy19l11	0	0.522230729118867	0.365	0.069	0	3
Wipf1	0	0.515795026542247	0.317	0.036	0	3
Fign	0	0.508724541843628	0.32	0.04	0	3
Cobll1	0	0.499544805402871	0.332	0.027	0	3
Tmcc3	0	0.499144844551425	0.418	0.091	0	3
Folh1	0	0.496106420916317	0.317	0.018	0	3
Rasgrp3	0	0.488731354785405	0.295	0.011	0	3
Trim59	0	0.488629813517591	0.308	0.008	0	3
Tnfaip6	0	0.482478933134221	0.304	0.007	0	3
Kctd13	0	0.474937929933173	0.324	0.026	0	3
Megf10	0	0.469264974063426	0.342	0.045	0	3
Ermn	0	0.46304633272397	0.297	0.003	0	3
Tmem63a	0	0.462043327368474	0.312	0.004	0	3
Ppfibp2	0	0.46011737138655	0.305	0.016	0	3
Arhgef28	0	0.458957829014825	0.331	0.061	0	3
St6gal1	0	0.457443420379958	0.293	0.042	0	3
Qdpr	0	0.453553242679819	0.304	0.016	0	3
Dock5	0	0.452050619141784	0.301	0.012	0	3
Prrg1	0	0.446731581999101	0.275	0.02	0	3
Ccp110	0	0.440964775030383	0.293	0.04	0	3
Plxnb3	0	0.428929354646372	0.288	0.007	0	3
Arsg	0	0.428120914982133	0.289	0.03	0	3
Nkain1	0	0.42740007441798	0.319	0.056	0	3
Mob3b	0	0.41578322610348	0.253	0.027	0	3
Stxbp3	0	0.412814192106787	0.294	0.038	0	3
Hapln2	0	0.399949465214166	0.259	0.002	0	3
Kcnk13	0	0.399278718058673	0.258	0.017	0	3
Sox10	0	0.39926225692068	0.26	0.011	0	3
Dbndd2	0	0.398931912432089	0.275	0.041	0	3
Gpr37	0	0.386214103444716	0.25	0.005	0	3
Clic4	0	0.38343849119063	0.254	0.018	0	3
Josd2	0	0.373809880252898	0.272	0.04	0	3
Hepacam	0	0.367490481531146	0.261	0.032	0	3
Myrf	0	0.366489194086807	0.257	0.004	0	3
Sccpdh	0	0.36239625801867	0.25	0.031	0	3
Myo6	4.32603959989942e-307	0.717479038835899	0.551	0.175	8.74335863535673e-303	3
2022-03-12	4.87406429025823e-304	0.933987324608279	0.709	0.272	9.85097133704091e-300	3
Agpat4	7.46748286294246e-302	0.505419716282287	0.364	0.077	1.5092529614293e-297	3
Gna12	6.43107986213061e-299	0.439774033870387	0.302	0.053	1.29978555093522e-294	3
Arap21	3.86821861114496e-292	0.606024899528262	0.429	0.108	7.81805663498507e-288	3
Kcnq31	3.36212013926913e-284	0.903697001335724	0.686	0.283	6.79518101347683e-280	3
Eml1	6.35551085545431e-284	0.684922921422163	0.383	0.094	1.28451229899587e-279	3
2610035D17Rik	5.44465383503766e-283	0.581320964627591	0.404	0.1	1.10041898659946e-278	3
Spock31	1.84417296706154e-279	0.904419154054825	0.548	0.184	3.72725798372808e-275	3
Bin1	1.26130023642399e-276	0.687105944572431	0.479	0.148	2.54921390783652e-272	3
Pacrg	7.77301463556522e-269	0.680969619796891	0.442	0.127	1.57100398799409e-264	3
Gm4258	5.40541736924197e-268	0.84668030956117	0.658	0.288	1.0924889044975e-263	3
Ncam22	5.78665362631973e-266	0.943270941767101	0.849	0.46	1.16954056441548e-261	3
Npas3	7.43774567551145e-261	0.328047186894964	0.636	0.208	1.50324277847762e-256	3
Cntn2	1.52896893583293e-256	0.580658679612271	0.447	0.133	3.09019911621193e-252	3
Fgfr2	1.54433000365236e-256	0.878004624000869	0.713	0.369	3.12124537038178e-252	3
Ddr1	1.87996252635574e-256	0.375578200653902	0.288	0.055	3.79959226201758e-252	3
Slc48a1	4.28230971338802e-254	0.362695108157236	0.278	0.052	8.65497616172852e-250	3
Elmo1	4.29614913533289e-243	0.754636124130444	0.606	0.248	8.6829470174213e-239	3
Mbnl21	3.3826262186799e-242	0.803738048963853	0.73	0.39	6.83662585057395e-238	3
Exoc6b	8.46814156714837e-235	0.876565476324688	0.702	0.383	1.71149609213636e-230	3
Dnm3	5.950682168635e-233	0.857823127848613	0.821	0.538	1.20269237310282e-228	3
Sez6l2	3.520965603984e-232	0.620962493655672	0.499	0.178	7.11622358221206e-228	3
Dpyd	3.23154566520525e-230	0.5241619862351	0.376	0.1	6.53127694394633e-226	3
Shtn1	6.17855799588553e-228	0.661000756452253	0.486	0.174	1.24874835654842e-223	3
Mtmr2	1.29582160611012e-223	0.435383679508873	0.314	0.075	2.61898504810916e-219	3
Mapt	2.4782701203725e-223	0.839652669030348	0.746	0.444	5.00883174028485e-219	3
Gnao1	1.36587160440312e-221	0.808082251644563	0.679	0.362	2.76056309965914e-217	3
Itsn2	9.32652941989798e-219	0.629930183299291	0.462	0.162	1.88498486105558e-214	3
Ptn	2.96925848092835e-216	0.523137651854598	0.388	0.111	6.00116831580428e-212	3
Lpgat1	3.68703928912566e-216	0.632546701875125	0.486	0.178	7.45187510725186e-212	3
Creb5	1.83982709342413e-212	0.481325089569473	0.34	0.088	3.71847453851951e-208	3
Cd81	5.95866959320398e-212	0.509050560455495	0.383	0.113	1.20430671148246e-207	3
Heg1	1.02672887590232e-208	0.36814333459598	0.258	0.054	2.07512173108619e-204	3
Abca2	1.27001987341672e-207	0.467046045217871	0.368	0.107	2.56683716616253e-203	3
Picalm	3.02976259912499e-205	0.680397120169999	0.565	0.251	6.12345318909151e-201	3
Sh3d19	5.43604176034602e-205	0.506202029351241	0.372	0.108	1.09867840018353e-200	3
Erbb41	3.19414593648422e-202	0.446835509195117	0.769	0.39	6.45568835222825e-198	3
4930419G24Rik1	1.4567215707622e-200	0.35844392160186	0.25	0.052	2.94417996666748e-196	3
Kndc1	1.6049796773169e-194	0.564107726406247	0.39	0.127	3.24382442582518e-190	3
Nfasc	2.20742269996699e-193	0.736357383926235	0.578	0.272	4.46142201890328e-189	3
Cdh101	6.04910186686671e-190	0.751861473492482	0.548	0.228	1.22258397831243e-185	3
Ncam1	3.8350039134018e-189	0.748872658033958	0.827	0.609	7.75092640937639e-185	3
Atp11a	2.35795950708914e-186	0.457464681804515	0.37	0.116	4.76567195977785e-182	3
Nrbp2	2.37761247681697e-184	0.39163563719121	0.302	0.08	4.80539257689478e-180	3
Daam2	4.05873841786559e-184	0.485548918659675	0.431	0.15	8.20311621634815e-180	3
Lama2	3.28263895750721e-183	0.317357996100339	0.284	0.067	6.63454159701782e-179	3
Ankib1	5.85865966737346e-183	0.583550358919252	0.475	0.188	1.18409370537285e-178	3
Efcab14	7.86869148128583e-183	0.399147637054308	0.299	0.079	1.59034123528268e-178	3
Bcl2l1	3.18695939100329e-179	0.467514861060136	0.367	0.117	6.44116362515674e-175	3
Apoe	8.37624792628778e-179	0.531512487815765	0.341	0.099	1.69292346838202e-174	3
Tcf12	1.26460574498753e-178	0.719446112085382	0.756	0.482	2.5558946711943e-174	3
Ephb1	1.02422745482447e-176	0.673386846856175	0.546	0.247	2.07006610894574e-172	3
Wnk1	1.10538409463479e-176	0.655151939679127	0.628	0.33	2.23409179366636e-172	3
Abhd17b	5.24978495245288e-176	0.463537453646093	0.335	0.101	1.06103403674025e-171	3
Vps8	2.53706015837714e-174	0.494067912663662	0.377	0.127	5.12765228609603e-170	3
Tulp4	1.03539902083653e-172	0.653384537486279	0.609	0.313	2.09264496101271e-168	3
Slc44a1	2.44505925950383e-172	0.62739350838876	0.55	0.26	4.94170926938318e-168	3
Clasp2	4.56121748375289e-170	0.688733097142758	0.802	0.592	9.21867665641297e-166	3
Baz2b	9.82933319187272e-170	0.706567336320815	0.698	0.425	1.9866065314094e-165	3
Fmnl2	5.48977761545029e-168	0.857465476613814	0.648	0.379	1.10953895385866e-163	3
Sort11	6.04377207628019e-168	0.468780485110482	0.351	0.114	1.22150677433699e-163	3
Daam1	2.71195668570244e-167	0.616042294621048	0.465	0.195	5.48113565747321e-163	3
Pakap1	9.90314221436698e-167	0.687542190079382	0.39	0.142	2.00152407294571e-162	3
Sbf1	1.28935767907556e-166	0.474922270918591	0.397	0.142	2.60592080517962e-162	3
Ywhaq	4.37654878339564e-165	0.417468359646857	0.34	0.108	8.84544274612093e-161	3
Tmem178b2	3.97696416703298e-161	0.718156484126444	0.758	0.514	8.03784227799036e-157	3
Limch1	2.5646961139887e-158	0.688489454637588	0.641	0.357	5.18350731598256e-154	3
Inpp5f	2.87960069625579e-157	0.492397477704683	0.394	0.145	5.81996096720258e-153	3
Neo1	1.40536843323762e-154	0.550594355156865	0.503	0.226	2.84039014041655e-150	3
5031439G07Rik	3.55141512803586e-154	0.407148268302688	0.312	0.097	7.17776511527327e-150	3
Itpk1	7.7051102714823e-150	0.389544977688379	0.29	0.087	1.55727983696929e-145	3
Sh3kbp11	1.61495106723603e-148	0.438850860915453	0.346	0.118	3.26397760199074e-144	3
Zdhhc14	1.75685919840298e-147	0.600104352453397	0.552	0.282	3.55078812589227e-143	3
App	7.51943273740963e-146	0.658014520646575	0.726	0.491	1.51975255055786e-141	3
Cdc42bpa	8.18968127960022e-146	0.722191249549539	0.741	0.52	1.65521648342e-141	3
Slc38a2	3.70323442019768e-142	0.632711765065643	0.529	0.27	7.48460708666154e-138	3
Secisbp2l	1.82282290302102e-136	0.368642666893429	0.294	0.094	3.68410736929578e-132	3
Cyth1	7.03253643160112e-135	0.488335354236434	0.396	0.162	1.4213459381909e-130	3
Agap1	5.65538866551563e-133	0.636178050315649	0.677	0.437	1.14301060318736e-128	3
Retreg1	3.69971749771947e-132	0.35896580837443	0.289	0.093	7.47749903464082e-128	3
Pik3r1	2.23033772038658e-131	0.396518067475116	0.341	0.122	4.50773556667332e-127	3
Dgki1	3.60527431922839e-125	0.656086382649494	0.663	0.414	7.28661992659249e-121	3
Robo12	5.29713165553724e-123	0.500152669346212	0.687	0.392	1.07060327890063e-118	3
Txndc16	1.3878623489809e-118	0.413184579670239	0.34	0.133	2.80500859352529e-114	3
Clasrp	1.94312122146167e-116	0.320634294302711	0.273	0.091	3.92724230069617e-112	3
Ube2d1	2.44592032638011e-115	0.342487419666545	0.288	0.101	4.94344957164685e-111	3
Kif13a	1.1286663060964e-113	0.497936376740839	0.475	0.239	2.28114747125144e-109	3
Tmem117	1.63474006407837e-112	0.49874217514026	0.386	0.171	3.3039731435088e-108	3
Zfp280c	1.98669316702017e-112	0.355892847052151	0.317	0.12	4.01530555986447e-108	3
Ube2e21	2.43220290108258e-112	0.647528682926108	0.731	0.524	4.91572528337801e-108	3
Gm48678	7.93768929023855e-112	0.463381274167132	0.355	0.147	1.60428638245011e-107	3
Hecw21	9.81917329495177e-112	0.611467935705119	0.682	0.469	1.9845531146427e-107	3
Ccdc88a2	2.20086025879602e-111	0.517442019990584	0.561	0.311	4.44815866905264e-107	3
Mon2	5.14697763691166e-110	0.448134541103951	0.412	0.192	1.04025565019622e-105	3
Ttll5	1.9398445666599e-109	0.448770303284452	0.409	0.189	3.92061985367633e-105	3
Map4k5	5.44716731775838e-109	0.475899265187833	0.427	0.207	1.10092698659215e-104	3
Kif1b	2.20442837607656e-108	0.567227279425911	0.752	0.586	4.45537019088834e-104	3
Sema6d1	1.81712486549942e-106	0.401161174282055	0.52	0.258	3.67259106566087e-102	3
Syt11	3.06399485042013e-105	0.494075271939241	0.459	0.237	6.19263999218413e-101	3
Zbtb161	8.29817895966054e-105	0.572800798994729	0.272	0.099	1.67714494953699e-100	3
Dcaf17	2.10816618310951e-104	0.412175148081444	0.287	0.108	4.26081467268264e-100	3
Acaca1	1.19193430230893e-103	0.56194246938371	0.474	0.256	2.40901841839658e-99	3
Cpeb2	1.40908265065088e-102	0.458657132774054	0.449	0.225	2.84789694523049e-98	3
Itch	3.56353858132713e-101	0.469360847394734	0.475	0.25	7.20226782672026e-97	3
Cab39l	9.41697923188856e-99	0.403138680539469	0.269	0.1	1.903265672557e-94	3
Mpzl1	3.37847348885657e-98	0.31140287580947	0.254	0.089	6.82823276832801e-94	3
Atp8a1	1.07140714256053e-97	0.523125972669209	0.621	0.401	2.16542097582908e-93	3
Zfp804b2	1.49252068297642e-97	0.573112285128313	0.333	0.137	3.01653355236365e-93	3
Mir100hg1	7.87890954916353e-97	0.425773960888221	0.49	0.25	1.59240640898144e-92	3
Ccdc50	3.17212864821947e-94	0.367177592632495	0.308	0.127	6.41118921091636e-90	3
Trim21	3.92139281695144e-92	0.526627118515043	0.533	0.324	7.92552702234055e-88	3
2022-03-08	5.89628393958026e-90	0.360409587366747	0.28	0.112	1.19169794702857e-85	3
Sik3	1.47780085177558e-89	0.564649120332782	0.654	0.469	2.98678330152362e-85	3
Map4k4	3.71285096471419e-88	0.375839787941686	0.407	0.204	7.50404308478385e-84	3
Ppp2r2a	6.45994826759963e-86	0.336901171726766	0.316	0.137	1.30562014436456e-81	3
Osbpl1a1	8.41975137884991e-86	0.358949737410981	0.329	0.146	1.70171595117936e-81	3
Tmcc1	1.16659852359638e-85	0.548601509106444	0.606	0.418	2.35781227604065e-81	3
Pkp4	2.60980553161714e-85	0.505783332900131	0.61	0.401	5.2746779599514e-81	3
Csmd32	1.40418426730255e-84	0.329554911734322	0.829	0.582	2.83799682264518e-80	3
Dip2b	3.54607952399344e-82	0.451182615079969	0.587	0.385	7.16698132594315e-78	3
Map4	1.38429033434106e-81	0.393863321686637	0.424	0.226	2.79778919473671e-77	3
Prkca1	8.30516145202035e-79	0.417048504828885	0.463	0.253	1.67855618106783e-74	3
Fam13c	1.21922742359621e-78	0.432472122813562	0.287	0.127	2.4641805458303e-74	3
Ssh2	5.48729531001189e-78	0.480370281163799	0.585	0.39	1.1090372551065e-73	3
Slc8a11	6.22874676565408e-77	0.456457449106887	0.72	0.509	1.25889200880635e-72	3
Dlg11	3.31744988400126e-76	0.459290301546131	0.69	0.494	6.70489796055495e-72	3
Kcna1	2.85076616112439e-72	0.41081512362141	0.397	0.215	5.7616834882485e-68	3
Epn2	8.04107850062152e-72	0.328997706343085	0.394	0.208	1.62518237576061e-67	3
E130308A19Rik	3.15318011062129e-71	0.313445739927844	0.278	0.123	6.37289232157668e-67	3
Cpd	4.49148517777248e-68	0.315526114004142	0.304	0.145	9.07774069279595e-64	3
Mitf	1.72292206233311e-67	0.284204699347019	0.272	0.12	3.48219778018145e-63	3
Tmod2	2.75091520562161e-67	0.361511841608665	0.304	0.149	5.55987472208183e-63	3
Desi1	9.86909972624396e-66	0.282117608652614	0.253	0.11	1.99464374567117e-61	3
Fryl	1.05215376943193e-65	0.336758720476514	0.349	0.181	2.12650798339887e-61	3
Slc25a27	9.62857105048459e-62	0.335497711387126	0.335	0.176	1.94603049501344e-57	3
Eps15	2.54472359564823e-61	0.257306820096669	0.287	0.135	5.14314085916465e-57	3
Dixdc1	4.7182023487015e-61	0.310549336977406	0.346	0.182	9.5359587669606e-57	3
Foxn3	2.5031337619432e-56	0.404966979964077	0.65	0.499	5.0590836462634e-52	3
Kdm6a	2.54520620444815e-56	0.374182522397977	0.459	0.29	5.14411625981015e-52	3
Ptpn11	2.01971684749005e-55	0.261973306729895	0.259	0.123	4.08204972046214e-51	3
Ddx17	3.8206900974728e-55	0.364070146337838	0.522	0.359	7.72199675600227e-51	3
Mat2a	6.24748875961496e-55	0.28788041458553	0.299	0.153	1.26267995320578e-50	3
Ptpra	2.02731981439718e-54	0.299555807012427	0.377	0.216	4.09741607687815e-50	3
Dpysl2	6.92465180730286e-53	0.280063943247698	0.319	0.172	1.39954137677398e-48	3
Zfp532	5.01701029904455e-52	0.275987687744104	0.286	0.147	1.01398795153989e-47	3
Wdr20	1.84500420751384e-51	0.25471740631637	0.264	0.13	3.72893800380622e-47	3
Tanc1	1.42940599446628e-50	0.25224667706843	0.321	0.171	2.88897245541581e-46	3
Kif21a	2.27343096401798e-50	0.360763831926966	0.521	0.362	4.59483132137674e-46	3
B3galt11	3.7178350524695e-49	0.333818845670198	0.649	0.473	7.51411642454611e-45	3
Gas7	7.10068306738483e-49	0.26031340357579	0.261	0.131	1.43511905474915e-44	3
Acap21	1.01209105553782e-48	0.34690667622406	0.405	0.254	2.04553723234749e-44	3
Trim35	3.58279118245537e-47	0.266224798680182	0.272	0.142	7.24117925886055e-43	3
Ptk21	4.09916461200974e-47	0.300047161578841	0.463	0.297	8.28482159733288e-43	3
Xist	2.44075811207575e-45	0.364941926344545	0.742	0.634	4.9330162203163e-41	3
Gnai1	1.40441573217989e-44	0.304417211520738	0.337	0.199	2.83846463630877e-40	3
Srsf2	2.2788637545425e-44	0.33284067721781	0.456	0.312	4.60581153430585e-40	3
9330182L06Rik	4.8404161823599e-44	0.28437994931796	0.287	0.16	9.78296514616759e-40	3
Atp1b3	5.79451419368228e-44	0.263269546673857	0.286	0.158	1.17112926368513e-39	3
Sema6a	3.32108534677695e-42	0.292120143606344	0.302	0.17	6.7122455943709e-38	3
Ralgps1	1.03893056540373e-40	0.340168901660549	0.408	0.277	2.09978256573747e-36	3
Slc22a23	2.77566036024734e-40	0.255305943856061	0.274	0.152	5.60988715409589e-36	3
Gm42418	2.03814354856298e-38	0.320082859487628	0.841	0.806	4.11929192600064e-34	3
Hnrnpdl	2.87120505128779e-36	0.252600617230282	0.325	0.2	5.80299252915774e-32	3
Rsrp11	8.70858540342442e-35	0.253265743658252	0.422	0.284	1.76009219588611e-30	3
Apbb2	1.28342230080078e-33	0.315229205653191	0.435	0.311	2.59392481214845e-29	3
Srcin1	2.85299501225294e-33	0.263717840658226	0.37	0.246	5.76618821926442e-29	3
Add1	1.99776743398413e-32	0.310027519542496	0.35	0.235	4.03768776082533e-28	3
Tasor	9.25116742763151e-32	0.269254956126099	0.404	0.279	1.8697534487986e-27	3
Nbas	1.66855799841182e-31	0.26793031341489	0.304	0.193	3.37232257059013e-27	3
Prkn1	9.42222815410661e-27	0.278967676058216	0.626	0.506	1.90432653222649e-22	3
Bcas3	3.17489370389996e-26	0.272969879746387	0.465	0.358	6.41677766495221e-22	3
Ank	2.87088502846698e-23	0.251783256182422	0.369	0.27	5.80234573103462e-19	3
Cntn32	3.04117504799267e-23	0.299916448260491	0.293	0.195	6.14651888949798e-19	3
Gpc51	0	3.71764546295743	0.857	0.086	0	4
Slc1a2	0	2.78500671542416	0.873	0.134	0	4
Npas31	0	2.55561554318442	0.92	0.214	0	4
Luzp2	0	2.03924972513999	0.823	0.188	0	4
Atp1a2	0	2.02018086486034	0.826	0.048	0	4
Gm3764	0	1.99756937421041	0.848	0.171	0	4
Pitpnc1	0	1.87614874511954	0.809	0.19	0	4
Ptprz1	0	1.77413487302702	0.857	0.132	0	4
Mir99ahg	0	1.76730981338779	0.916	0.467	0	4
Sparcl1	0	1.75407154557513	0.807	0.105	0	4
Apoe1	0	1.71363767648086	0.72	0.095	0	4
Rorb	0	1.6774370568844	0.755	0.072	0	4
Slc1a3	0	1.64072546168013	0.732	0.075	0	4
Nhsl1	0	1.60632167791714	0.713	0.045	0	4
Qk1	0	1.59306707411533	0.88	0.314	0	4
Trps11	0	1.59189709670317	0.825	0.244	0	4
Plpp3	0	1.47617807179925	0.702	0.048	0	4
Rgs62	0	1.39249541504422	0.701	0.161	0	4
Dgkb2	0	1.37613647962848	0.77	0.223	0	4
Sox6	0	1.34403495271672	0.705	0.07	0	4
Prex2	0	1.27922952692548	0.596	0.061	0	4
Sfxn5	0	1.2557840251869	0.69	0.121	0	4
Sash1	0	1.18781517003886	0.631	0.078	0	4
Rgs20	0	1.15183029554604	0.534	0.077	0	4
Ddhd1	0	1.13218098679516	0.66	0.159	0	4
Slc6a11	0	1.11265064951425	0.539	0.016	0	4
Slc39a12	0	1.05238875899629	0.569	0.015	0	4
Phka1	0	1.04684947528508	0.558	0.111	0	4
Lama21	0	1.0429956481906	0.58	0.064	0	4
Bmpr1b	0	1.01919954822543	0.551	0.025	0	4
Acsl3	0	1.00963794043197	0.565	0.086	0	4
Itih3	0	1.00242286858566	0.487	0.027	0	4
Glul1	0	0.977355421883791	0.559	0.063	0	4
Gm6145	0	0.965050622497827	0.574	0.017	0	4
Dock11	0	0.942685006814243	0.563	0.08	0	4
Nckap5	0	0.922236121192652	0.52	0.093	0	4
Pard3b	0	0.918362312123306	0.52	0.068	0	4
Ntsr2	0	0.916234353098124	0.536	0.017	0	4
Gli3	0	0.914208034825591	0.518	0.019	0	4
Csgalnact11	0	0.887189915662546	0.513	0.086	0	4
Glis3	0	0.882548900235697	0.48	0.026	0	4
Mertk	0	0.877374274225239	0.476	0.037	0	4
Atp13a4	0	0.867715820588343	0.531	0.016	0	4
Arhgef26	0	0.85741814676103	0.492	0.04	0	4
Prkd1	0	0.848921033739273	0.491	0.072	0	4
Bcan	0	0.845307590646192	0.5	0.043	0	4
Slc7a10	0	0.839916242755999	0.492	0.019	0	4
Tcf7l2	0	0.821091257469904	0.518	0.07	0	4
Lrig1	0	0.80912712883762	0.477	0.062	0	4
F3	0	0.787813902397873	0.489	0.019	0	4
Gm12239	0	0.783754786607692	0.361	0.025	0	4
Sat1	0	0.759501048001569	0.453	0.052	0	4
Aqp4	0	0.740371590959163	0.394	0.013	0	4
Mt1	0	0.738338490868001	0.425	0.062	0	4
Egfr	0	0.717173127417966	0.411	0.025	0	4
Cpq	0	0.714463847625648	0.411	0.044	0	4
Kank1	0	0.712199039650052	0.418	0.022	0	4
Nwd1	0	0.695745673584553	0.451	0.024	0	4
Ndrg2	0	0.68193281284367	0.438	0.037	0	4
Rfx4	0	0.676814733748405	0.418	0.02	0	4
Tprkb	0	0.671135891097242	0.371	0.032	0	4
Pla2g7	0	0.648847063309812	0.402	0.025	0	4
Gm20713	0	0.638848617925142	0.396	0.02	0	4
Acsbg1	0	0.637072699045109	0.406	0.018	0	4
Aldh1a1	0	0.631378791806159	0.263	0.021	0	4
Gpam	0	0.620768427198858	0.416	0.033	0	4
Itpkb	0	0.620116169557441	0.376	0.035	0	4
Plce1	0	0.615391047463386	0.361	0.039	0	4
Htra1	0	0.582493330062113	0.372	0.022	0	4
Ccdc141	0	0.57223435746673	0.35	0.019	0	4
Gja1	0	0.57150868366079	0.365	0.01	0	4
Mmd2	0	0.568316549915978	0.398	0.047	0	4
Slc7a11	0	0.552908504573499	0.305	0.009	0	4
Fgfr3	0	0.512440631188769	0.368	0.009	0	4
Phkg1	0	0.506356881642547	0.314	0.014	0	4
Fam20a	0	0.500819636604181	0.323	0.015	0	4
Lix1	0	0.498182165181223	0.322	0.019	0	4
Gm973	0	0.465054153559983	0.292	0.006	0	4
Gramd3	0	0.461965288610001	0.317	0.023	0	4
Tcf7l1	0	0.456237264283918	0.298	0.02	0	4
Prdm16	0	0.455779180717702	0.286	0.007	0	4
Itga6	0	0.45502278922901	0.302	0.026	0	4
Gli2	0	0.452397860772753	0.319	0.012	0	4
B230323A14Rik	0	0.446021855087613	0.257	0.006	0	4
Gpr37l1	0	0.440971509197939	0.303	0.022	0	4
Gjb6	0	0.438310506881834	0.302	0.009	0	4
Acss1	0	0.428065132752349	0.299	0.021	0	4
Rapgef3	0	0.420470935316701	0.272	0.011	0	4
Irak2	0	0.412918262424922	0.276	0.023	0	4
Gm40578	0	0.396691815258601	0.276	0.018	0	4
Slc7a2	0	0.381082660258989	0.27	0.01	0	4
Slc4a4	4.01182937146328e-304	1.75398663397427	0.894	0.434	8.10830834266445e-300	4
Ston2	3.79953559335674e-301	0.436081756417246	0.278	0.026	7.67924138773332e-297	4
Gabrb12	5.42852417478791e-299	1.79892079187381	0.856	0.353	1.09715902096638e-294	4
Myo10	1.03699250103975e-298	0.451052507181346	0.318	0.035	2.09586554385144e-294	4
Serpine2	7.1453780694175e-293	0.468446848818392	0.31	0.033	1.44415236160997e-288	4
Hepacam1	1.65153731689413e-290	0.42983059373175	0.332	0.038	3.33792207117473e-286	4
Ttyh1	2.74258117313871e-288	0.779659714446784	0.487	0.09	5.54303080903064e-284	4
Itpr2	7.45610958605081e-288	0.52972714715312	0.368	0.048	1.50695430843673e-283	4
Psd2	2.1747539466413e-284	0.432260964501395	0.299	0.032	4.39539520155673e-280	4
Msi2	2.58395608729731e-273	1.52671082504516	0.853	0.414	5.22243364803658e-269	4
Wdr171	4.45442159622569e-267	1.13228897175476	0.571	0.136	9.00283148813173e-263	4
Glud1	3.28706706476175e-262	0.877523766048083	0.526	0.117	6.64349124458997e-258	4
Ghr	2.78091392989959e-261	0.721902590647838	0.403	0.066	5.62050514372006e-257	4
Cdh201	1.23442122688645e-256	1.07044483043478	0.608	0.153	2.49488874166021e-252	4
Camk2g	2.51905709021505e-254	0.991288231859842	0.574	0.147	5.09126628503363e-250	4
Ntm	2.7420913920867e-254	1.38960928746209	0.992	0.859	5.54204091254643e-250	4
Cep85l	1.47851950997547e-250	0.887365530827336	0.54	0.128	2.98823578161142e-246	4
Prdx6	5.43052488150583e-247	0.368899874673349	0.272	0.03	1.09756338380114e-242	4
Dtna	3.93511820397411e-242	1.31021876683746	0.832	0.409	7.95326740205208e-238	4
Asrgl1	1.64223287405356e-239	0.611561269603724	0.435	0.082	3.31911686174965e-235	4
Rgma	1.55563478946513e-237	0.366116238583226	0.259	0.029	3.14409347298797e-233	4
Lsamp1	8.16804066657514e-234	1.45909093468973	1	0.948	1.6508426991215e-229	4
Frmpd1	7.80273329565872e-233	0.388976126312648	0.256	0.029	1.57701042638558e-228	4
Eps151	7.81694294632705e-232	0.846652029959647	0.535	0.132	1.57988233888216e-227	4
Rmst1	1.25159186643012e-230	0.888130426574606	0.511	0.111	2.52959232124193e-226	4
Gpld1	2.79684191844638e-229	0.437256047822717	0.294	0.039	5.65269720137197e-225	4
Cables1	8.32098288404972e-229	0.596673104247619	0.353	0.057	1.68175385069529e-224	4
Cst3	1.25084180759654e-225	1.01493033947139	0.503	0.12	2.52807637733337e-221	4
Paqr8	7.19260319253295e-225	0.591941557142988	0.404	0.075	1.45369703124283e-220	4
Macf1	7.47943752709924e-224	1.22989225816691	0.951	0.739	1.51166911860203e-219	4
Sox51	5.24964371408173e-220	0.916756802715996	0.597	0.157	1.06100549105306e-215	4
Mapk41	6.11947838470355e-218	0.781822600051649	0.503	0.119	1.23680777633244e-213	4
Arhgef4	4.62375817078283e-216	0.687592596087296	0.368	0.066	9.34507763896919e-212	4
Hdac8	5.26573144037119e-214	1.09963456667067	0.705	0.272	1.06425698141342e-209	4
Nfia	4.08811872514047e-213	1.23838835111571	0.889	0.488	8.26249675538141e-209	4
Slc27a1	8.18057044036687e-211	0.367091469916509	0.292	0.041	1.65337509170255e-206	4
Clu	9.57251779245717e-207	0.50239778793654	0.314	0.049	1.93470157103352e-202	4
Arap22	3.01849022841726e-205	0.723066188959341	0.492	0.118	6.10067060065412e-201	4
Farp1	4.72188694154635e-202	1.06676801279196	0.647	0.236	9.54340569755932e-198	4
Slc6a1	1.36505564739065e-200	0.712113789976611	0.477	0.114	2.75891396894125e-196	4
Stox2	1.5454521618186e-199	1.01532752217893	0.687	0.268	3.12351336425157e-195	4
Nim1k	1.88871275433221e-198	0.3429189047117	0.256	0.033	3.81727734778083e-194	4
Abr2	6.672219728555e-198	0.885346616894804	0.569	0.176	1.34852232933825e-193	4
Pdlim5	4.9894641906542e-196	0.349656876580488	0.264	0.036	1.00842060757312e-191	4
Zbtb201	5.78372615949635e-196	1.10947584973307	0.978	0.737	1.16894889409581e-191	4
Myo61	5.45806936429837e-194	0.851844672044274	0.596	0.188	1.10313039921834e-189	4
Ptn1	3.86353483778814e-191	0.806284646991624	0.474	0.119	7.8085902606536e-187	4
Utrn	1.02426539338171e-187	0.796567387446377	0.558	0.163	2.07014278656377e-183	4
Nebl1	3.10431514867036e-187	1.12620725089631	0.66	0.251	6.27413134697766e-183	4
Itgb8	3.89006702990342e-183	0.379557211567024	0.261	0.038	7.8622144741378e-179	4
Pnpla7	8.12279583238872e-182	0.379883398762851	0.272	0.041	1.64169826568408e-177	4
Srgap11	1.00833816220133e-180	0.737219960247194	0.454	0.114	2.0379522596251e-176	4
Maml2	6.2581935150036e-179	0.955368694518488	0.677	0.256	1.26484349131738e-174	4
Pygb	4.12059222271217e-178	0.509176808612186	0.344	0.067	8.32812894132356e-174	4
Vegfa	2.08213923075247e-175	0.446180318519329	0.325	0.06	4.20821159927382e-171	4
Ctnnd2	3.90600850514046e-173	1.07555599095385	0.964	0.8	7.89443378973939e-169	4
Mgat4c1	7.18103406627686e-171	1.0247841268045	0.646	0.222	1.45135879513522e-166	4
Fry1	1.13589006694872e-168	1.24339171940576	0.752	0.417	2.29574741431005e-164	4
Trpm3	7.93111089378879e-167	1.39212846730051	0.927	0.693	1.60295682274365e-162	4
4930402H24Rik	5.67232730368824e-165	1.03396684186119	0.705	0.327	1.14643407134843e-160	4
Ptch1	3.15788436415875e-164	0.798997275540657	0.476	0.136	6.38240008840126e-160	4
Vcl	5.27116298775442e-164	0.6222402418557	0.388	0.092	1.06535475145505e-159	4
Plcb11	5.17476231142254e-163	1.33557059288133	0.865	0.49	1.04587121076161e-158	4
Adk	4.15166085079069e-162	0.921121863900408	0.589	0.219	8.39092174553306e-158	4
Mir100hg2	7.73615528695433e-161	0.907625969006789	0.647	0.253	1.56355434504634e-156	4
Ugp2	5.36715404983411e-156	0.484996257265342	0.321	0.065	1.08475550501197e-151	4
Adcy21	1.35082257938764e-155	0.816220149383935	0.504	0.151	2.73014751520036e-151	4
Tnik	8.61193636824796e-155	1.05800253869741	0.829	0.541	1.74055845938659e-150	4
Atp1b2	2.75356971873885e-154	0.455989122598854	0.36	0.081	5.5652397585431e-150	4
Stard131	2.14709723049848e-153	0.497284732142068	0.356	0.077	4.33949821256047e-149	4
Gpm6b2	8.89090828612844e-153	0.8994031570474	0.664	0.274	1.79694147370942e-148	4
Sorcs2	3.54105356145909e-152	0.453408790108993	0.294	0.056	7.15682335306497e-148	4
Grm32	2.87352185896435e-151	1.02354145205077	0.544	0.183	5.80767502915284e-147	4
Wwc1	1.1130542133135e-150	0.569353855240642	0.371	0.089	2.24959387052791e-146	4
Xist1	2.79476947978198e-149	0.940109883670356	0.902	0.632	5.64850859558736e-145	4
Phlpp11	4.21054843989049e-149	0.74509892688668	0.701	0.293	8.50993945186267e-145	4
Nnat	8.29082763607382e-149	1.16489485172285	0.315	0.067	1.67565917352688e-144	4
Arhgap5	2.14241514203308e-148	0.890058191084033	0.609	0.243	4.33003524356306e-144	4
Pcdh72	2.4901809143493e-148	0.918182597932426	0.795	0.373	5.03290464599138e-144	4
Cachd1	8.37830422806535e-147	0.510053499126477	0.309	0.064	1.69333906753429e-142	4
B3galt12	2.43820007115696e-146	1.09344958265771	0.814	0.474	4.92784616381532e-142	4
Igsf111	3.32041440252511e-146	0.447150224625774	0.311	0.064	6.7108895489435e-142	4
Megf101	9.5173238375754e-146	0.398639870262692	0.299	0.058	1.92354632081236e-141	4
Cdh102	1.01637213642673e-145	0.868465269541067	0.621	0.237	2.05418972493207e-141	4
Mdga22	2.20143811160901e-145	1.0786855255329	0.895	0.528	4.44932656737297e-141	4
Cyp7b1	3.4093331714288e-142	0.479621432302755	0.288	0.058	6.89060327277476e-138	4
2610035D17Rik1	7.97521762832719e-142	0.630729112414402	0.41	0.112	1.61187123486121e-137	4
Son	3.76427413201292e-141	0.964405644267373	0.783	0.468	7.60797444821131e-137	4
Tox1	2.36323641882467e-138	0.667012264743783	0.438	0.123	4.77633712608654e-134	4
Trim91	5.52331887180306e-137	0.916285683872682	0.582	0.238	1.11631797718012e-132	4
Plekhg11	7.14183921992482e-136	0.401144373791767	0.295	0.06	1.443437124739e-131	4
Frmd4a2	5.87528886676674e-131	1.04532363402375	0.841	0.464	1.18745463286223e-126	4
Fat32	7.34346370081422e-129	0.769643891487082	0.577	0.219	1.48418744857156e-124	4
Pbx11	2.92624408687892e-126	0.950963182348593	0.827	0.521	5.91423192399099e-122	4
Neat11	5.54931835431737e-125	0.400405448064105	0.336	0.079	1.12157273259108e-120	4
Sema6d2	5.78991548283931e-121	1.08600807446803	0.608	0.265	1.17019981823665e-116	4
Znrf3	2.87617085547626e-120	0.592196455473134	0.392	0.117	5.81302891600307e-116	4
Clmn1	8.80135243209473e-120	0.447526190372071	0.279	0.062	1.77884134005067e-115	4
Fmn21	1.69921925564562e-119	0.822202287953645	0.64	0.31	3.43429203758536e-115	4
Gna13	2.27833090433576e-118	0.377478509491515	0.287	0.065	4.604734590753e-114	4
Abca1	3.56553634903032e-118	0.335698226868652	0.257	0.053	7.20630551502518e-114	4
Gpc62	6.08894546458892e-118	0.590743503792303	0.547	0.191	1.23063676784807e-113	4
Agl	1.51403780729447e-117	0.423197416297341	0.276	0.062	3.06002181232285e-113	4
Arhgef12	3.40379402722065e-117	0.807137692495402	0.654	0.334	6.87940810841565e-113	4
Bcl2	6.48899573102462e-117	0.570161695480837	0.346	0.095	1.31149092719739e-112	4
Cpe	7.36063490536396e-117	1.04527083521047	0.65	0.353	1.48765792072311e-112	4
Hacd2	1.8288904210333e-114	0.519355976357906	0.336	0.091	3.69637042995039e-110	4
Phyhipl	3.04357439118892e-112	0.513784891480266	0.35	0.099	6.15136820203192e-108	4
Usp53	3.53826144679482e-112	0.58954307324198	0.33	0.091	7.151180210117e-108	4
Rora	4.44962398096113e-112	0.566961652946784	0.98	0.837	8.99313502792054e-108	4
Rhoq	4.30843235495064e-111	0.377955890247503	0.252	0.055	8.70777263259074e-107	4
Pik3r11	3.08308712508632e-110	0.566546221045491	0.402	0.129	6.23122738851196e-106	4
Vav3	2.2249970718117e-109	0.421680795507895	0.282	0.066	4.49694158183863e-105	4
Pde7b1	2.15941095011323e-108	0.538692379263696	0.396	0.121	4.36438547127384e-104	4
Tle4	1.07378171353383e-107	0.602384723291718	0.487	0.18	2.17022022122322e-103	4
Atl2	1.06280797858605e-106	0.526574060838009	0.368	0.114	2.14804120552026e-102	4
Xylt11	2.54668731793729e-104	0.485448751212989	0.388	0.121	5.14710973828305e-100	4
Carmil1	4.11268974573218e-99	0.613285982665997	0.47	0.188	8.31215724509931e-95	4
Gpd2	5.32327687650286e-99	0.462836219434747	0.303	0.084	1.07588748950999e-94	4
Dmd2	1.48832886198374e-98	0.786524587366271	0.869	0.559	3.00806146295534e-94	4
Tmcc31	4.60974914108255e-98	0.522903947709181	0.35	0.106	9.31676398904194e-94	4
Ppp2r5a	5.95311697255396e-98	0.364993067876949	0.267	0.066	1.20318447132288e-93	4
Rreb1	9.32502405620501e-96	0.354775773845251	0.256	0.061	1.88468061199959e-91	4
Alcam2	3.59315336373611e-94	0.552855976758898	0.527	0.213	7.26212226344704e-90	4
Nrxn11	3.32242864100024e-91	0.795017514796068	0.951	0.931	6.71496052632559e-87	4
Eps8	7.34420455748402e-91	0.562270450236405	0.418	0.153	1.4843371831131e-86	4
Ptprm1	1.24357670833189e-89	0.436842603129784	0.454	0.164	2.51339288520958e-85	4
Ahcyl1	8.42941173372873e-89	0.557926301179434	0.442	0.178	1.70366840550391e-84	4
Npas21	6.38583367589832e-87	0.397863168232462	0.278	0.077	1.29064084423581e-82	4
Tead1	1.1567301148572e-86	0.395161688179496	0.321	0.098	2.33786723513789e-82	4
Erbb42	1.35105982860039e-85	0.674978095085725	0.695	0.407	2.73062701958424e-81	4
Fhit	3.36772294254617e-83	0.579186278144387	0.365	0.129	6.80650483918006e-79	4
Enah1	1.11025590327992e-82	0.636730108163153	0.539	0.263	2.24393820611904e-78	4
Grk3	1.76698497051485e-80	0.444166647215882	0.377	0.139	3.57125332390756e-76	4
Meis21	2.49306176538067e-80	0.375806046899494	0.317	0.097	5.03872713401087e-76	4
Cd811	2.52271295303888e-80	0.457849358713988	0.354	0.125	5.09865514938688e-76	4
Adgrl32	4.47562562498708e-80	0.650927993479119	0.916	0.679	9.04568695066139e-76	4
Kcnn21	6.83118601715572e-80	0.675520575999015	0.503	0.234	1.38065100592734e-75	4
Zeb1	7.24178725152708e-80	0.654789843160328	0.606	0.332	1.46363762140614e-75	4
Acsl6	4.23348408782989e-79	0.399680786198228	0.323	0.107	8.55629468991298e-75	4
Tmem164	5.29764844896092e-79	0.537620360446529	0.387	0.149	1.07070772801949e-74	4
Lrmda1	7.34654654560316e-79	0.423589734711053	0.275	0.079	1.48481052233186e-74	4
Daam21	1.43315097274295e-77	0.433353319608497	0.418	0.161	2.89654143101078e-73	4
Cspg5	3.81082014519661e-77	0.468085756451936	0.296	0.096	7.70204859545687e-73	4
Ppp2r2b2	2.29215234051974e-76	0.751298907494706	0.646	0.373	4.63266909542444e-72	4
Nrcam1	6.41546505595975e-75	0.676341279972352	0.733	0.484	1.29662964246003e-70	4
Wasf3	9.25916008553032e-74	0.407331410418919	0.33	0.115	1.87136884488653e-69	4
Phkb	1.58587566161681e-69	0.538927475058982	0.442	0.201	3.20521329969374e-65	4
Klf121	8.91682406046434e-69	0.622678673109175	0.584	0.318	1.80217931086045e-64	4
Gk	1.29635359345053e-68	0.362632654260166	0.274	0.088	2.62006024772286e-64	4
Adgrb31	5.74789295435111e-68	0.549071045854221	0.989	0.929	1.1617066450039e-63	4
Appl21	8.7838952250546e-68	0.545435015511419	0.574	0.31	1.77531306393579e-63	4
Ppargc1a	7.56703478898174e-67	0.408618187117984	0.309	0.11	1.5293734012011e-62	4
Gm35188	3.92218053819907e-66	0.479681159457375	0.368	0.149	7.92711908575415e-62	4
Ntrk21	6.59255660227271e-65	0.638511004538819	0.695	0.481	1.33242161488534e-60	4
Ccdc85a2	3.43160932037492e-64	0.502478596006134	0.391	0.165	6.93562559740975e-60	4
Fermt2	1.06694111169973e-63	0.423053186951613	0.325	0.125	2.15639468085632e-59	4
Asap11	1.56920017110216e-63	0.509867751448639	0.499	0.248	3.17151046581457e-59	4
Scd21	1.63409818740599e-63	0.402916968446443	0.371	0.148	3.30267584656625e-59	4
Mir9-3hg	2.88541030306917e-62	0.430376186749194	0.309	0.115	5.83170276353311e-58	4
Fam184a	2.89439885882597e-60	0.473393709348979	0.377	0.165	5.84986953357316e-56	4
Add3	1.09465321943935e-59	0.482016515768739	0.399	0.183	2.21240362180887e-55	4
Washc2	1.93898496404035e-59	0.376699891305643	0.257	0.087	3.91888251082195e-55	4
Fars2	3.67641922596145e-59	0.706747825737245	0.442	0.227	7.4304108975907e-55	4
Map2k6	1.44370929965926e-58	0.329914213014165	0.256	0.086	2.91788086554133e-54	4
Tspan7	2.28829029175213e-58	0.863580647760292	0.567	0.369	4.62486350866024e-54	4
Abat	1.68476371677366e-57	0.314461638581315	0.259	0.089	3.40507594797124e-53	4
Chpt1	7.69739450653845e-56	0.371410004367004	0.301	0.116	1.55572040371649e-51	4
Ncam11	1.03021376045406e-54	0.551491209589061	0.775	0.62	2.0821650312537e-50	4
Grid21	2.21245872496293e-54	0.548588497983511	0.922	0.759	4.47160032902257e-50	4
Gabra22	1.81888044637522e-53	0.495247503543778	0.327	0.136	3.67613927016896e-49	4
Rfx31	1.07140429552872e-52	0.506565318403856	0.555	0.325	2.1654152216931e-48	4
Spire1	7.08426017921761e-52	0.511780796656887	0.473	0.264	1.43179982482167e-47	4
Garem1	1.21724356952179e-49	0.369768719255834	0.264	0.102	2.4601709783605e-45	4
Thrb1	3.87404038368978e-49	0.433172044868443	0.43	0.211	7.82982301947542e-45	4
Zfp608	2.20254076816708e-48	0.468421417898485	0.445	0.234	4.45155514654249e-44	4
Mboat21	3.79907486609409e-48	0.383524325864872	0.287	0.117	7.67831021186276e-44	4
Ccdc88a3	4.00858983767839e-48	0.554495355500961	0.539	0.322	8.10176092093179e-44	4
Chst11	5.21819520754665e-48	0.352899624121596	0.291	0.118	1.05464943339725e-43	4
Mfn1	1.9901681079719e-47	0.435157664840275	0.418	0.219	4.022328763022e-43	4
Mpp6	4.84220108998561e-47	0.436818032608024	0.346	0.159	9.78657262296991e-43	4
Lgi1	6.57643951317156e-47	0.437890663105328	0.353	0.168	1.3291641900071e-42	4
Rab311	1.49353099417656e-46	0.377034104797159	0.31	0.132	3.01857549233024e-42	4
Mcc	2.10649162939027e-46	0.444379616313396	0.442	0.234	4.25743023216067e-42	4
Ncoa1	2.15963358395909e-46	0.473821700687384	0.53	0.323	4.36483543653972e-42	4
Nlgn12	1.03346954542732e-45	0.431213849736786	0.96	0.788	2.08874529826316e-41	4
Nfib1	7.04049728393204e-45	0.496579300757338	0.745	0.535	1.42295490605551e-40	4
Chd9	1.61347354214567e-41	0.504578137602572	0.631	0.45	3.26099137603061e-37	4
Cadm21	4.38457328492041e-41	0.447993389589301	0.992	0.957	8.86166106615263e-37	4
Abi1	1.51678724498677e-39	0.386482803406917	0.369	0.193	3.06557870084277e-35	4
C130071C03Rik1	2.08811801474466e-38	0.491247300022973	0.503	0.319	4.22029531960042e-34	4
Spon1	3.50022255000199e-38	0.348298530672601	0.282	0.126	7.07429979580902e-34	4
Scg3	4.86401683100789e-38	0.299873837715687	0.256	0.109	9.83066441715004e-34	4
Cdh2	7.14129908836982e-38	0.468959674959603	0.534	0.351	1.44332795875042e-33	4
Ncam23	1.00361404822605e-35	0.300901080987935	0.73	0.48	2.02840435286967e-31	4
Hnrnpa2b1	4.32145744432714e-34	0.403828041447699	0.528	0.358	8.73409764072959e-30	4
Zswim61	6.39144056025981e-34	0.371323957350279	0.381	0.211	1.29177405163411e-29	4
Xpr1	7.86844144397164e-34	0.346349368488634	0.364	0.196	1.59029070024111e-29	4
Nr3c21	2.61098174951641e-33	0.402015993441027	0.456	0.277	5.27705521394761e-29	4
Hipk21	3.01039817267234e-31	0.317894123109413	0.354	0.191	6.08431574678806e-27	4
Ddx171	5.65908303827568e-31	0.400179182264132	0.526	0.365	1.1437572728659e-26	4
Prkca2	6.99754515442936e-31	0.424814351505324	0.434	0.262	1.41427385116172e-26	4
Bmpr1a	1.27635072192576e-30	0.366785213603559	0.333	0.182	2.57963244408416e-26	4
Ank2	7.90582047611489e-30	0.256789424138527	0.978	0.915	1.59784537642758e-25	4
Dclk11	4.64314956538581e-29	0.485690494823076	0.69	0.519	9.38426958660126e-25	4
Kmt2c	5.00530509059072e-29	0.426525547992726	0.592	0.451	1.01162221185929e-24	4
Tsix	7.19029692383943e-29	0.331065358843539	0.291	0.151	1.45323091127719e-24	4
Cadm12	7.55879685248211e-29	0.516193180554982	0.778	0.634	1.52770843185516e-24	4
Mical21	1.08974014645829e-28	0.354205586592893	0.423	0.263	2.20247381000685e-24	4
Nxn1	1.47116713572285e-28	0.328529802742879	0.33	0.176	2.97337589800945e-24	4
Gria11	4.06972701820673e-28	0.366115229471997	0.431	0.263	8.22532527649763e-24	4
Cyfip1	1.57303727231207e-27	0.260662517166436	0.251	0.122	3.17926563106993e-23	4
Fgfr21	1.6313260573722e-26	0.395023328501295	0.534	0.389	3.29707309455495e-22	4
Ckb	1.7656951951067e-26	0.341491029877797	0.357	0.21	3.56864655883014e-22	4
Peli2	2.30318282126265e-26	0.272981219393725	0.271	0.139	4.65496280005395e-22	4
Sorbs1	8.01167088377396e-26	0.412854300226814	0.52	0.379	1.61923880231956e-21	4
Neo11	1.7451118555876e-25	0.357626148634701	0.387	0.241	3.52704557132809e-21	4
Zhx3	3.49167357891043e-25	0.282963209437648	0.272	0.144	7.05702147033587e-21	4
Ptprt2	7.26500765571494e-25	0.438209569558855	0.516	0.356	1.46833069729655e-20	4
Gphn	8.14345743238552e-25	0.390496621910051	0.873	0.797	1.64587418165944e-20	4
Ssbp22	9.44029723021424e-25	0.349075647963166	0.507	0.348	1.9079784731986e-20	4
Nfat5	1.2523104068336e-24	0.384332237666302	0.484	0.34	2.53104456325139e-20	4
Map4k41	1.85498733462395e-24	0.331611909241716	0.354	0.214	3.74911490200847e-20	4
Ptpn4	2.33251041804898e-24	0.39895993538133	0.46	0.32	4.71423680591879e-20	4
Kif1b1	2.62168612405704e-24	0.372522528321052	0.697	0.594	5.29868982533168e-20	4
Mgll	1.47808470765011e-23	0.314338395446702	0.283	0.157	2.98735700263163e-19	4
Pde8b2	2.82373278372686e-23	0.288434815763176	0.294	0.163	5.70704632919036e-19	4
Spag9	9.59175729322014e-23	0.414221171230901	0.565	0.448	1.93859006653272e-18	4
Lrp1	2.77365392867102e-22	0.312551075483615	0.437	0.295	5.605831955237e-18	4
Ocrl	1.4221605706119e-21	0.250700944423826	0.282	0.159	2.87432872926372e-17	4
Dock41	2.05089327729468e-21	0.304241020989764	0.776	0.67	4.14506040274027e-17	4
Prkn2	7.29928935475644e-21	0.303464699593579	0.664	0.509	1.47525937148982e-16	4
Vps13d	1.04533422870991e-20	0.267314327711946	0.341	0.212	2.1127250096456e-16	4
Fut9	1.43884297925033e-20	0.367272613744274	0.569	0.443	2.90804554536283e-16	4
Hip1	1.58907345300206e-20	0.25809194324744	0.255	0.14	3.21167635586246e-16	4
Astn12	1.76926948098074e-20	0.2782578031456	0.364	0.231	3.57587054801018e-16	4
Limch11	6.66894641081311e-20	0.294053832578794	0.513	0.373	1.34786075908944e-15	4
Cpeb41	7.07884679708945e-20	0.433132905922326	0.406	0.291	1.43070572615975e-15	4
Pnisr	7.45344336311359e-20	0.368801905244969	0.558	0.449	1.50641543811889e-15	4
Rab30	1.71876771310485e-19	0.258013177242439	0.311	0.19	3.47380142495621e-15	4
Pacrg1	2.6094912896735e-19	0.272820149055883	0.257	0.146	5.2740428455591e-15	4
Ttc28	4.78473047232364e-19	0.2551917983969	0.334	0.208	9.67041875761331e-15	4
Itsn1	8.33886190523821e-19	0.306400190616529	0.387	0.265	1.6853673796677e-14	4
Desi2	8.45681787259497e-19	0.277264522361915	0.305	0.186	1.70920746023017e-14	4
Ogt	1.51345249990242e-18	0.353593174632287	0.563	0.455	3.05883884755278e-14	4
Ptpra1	1.82724295051975e-18	0.27394642009229	0.344	0.224	3.69304072729547e-14	4
Tcf25	2.70443712368497e-18	0.279066248095624	0.38	0.258	5.46593787067968e-14	4
Pid1	3.96775943453831e-18	0.271433049818482	0.314	0.195	8.01923859314538e-14	4
Phf21a	1.48787393911473e-17	0.322904346196708	0.538	0.42	3.00714201834477e-13	4
Gm26917	1.36397016673769e-15	0.269705325268507	0.303	0.198	2.75672010399355e-11	4
Rb1	1.96544288461947e-15	0.266549026108195	0.338	0.228	3.97235661410441e-11	4
Rasa2	9.42424823540722e-15	0.257243381426437	0.278	0.178	1.90473481085815e-10	4
Apc1	1.00738539695714e-14	0.339909455807424	0.601	0.517	2.03602662579007e-10	4
Gnao11	1.25227702389091e-14	0.483570063095573	0.457	0.382	2.53097709298591e-10	4
Gria22	7.79229028422275e-14	0.457453676220547	0.856	0.811	1.57489978934426e-09	4
Ubr5	2.18825091220858e-13	0.28716442079714	0.439	0.344	4.42267391866476e-09	4
Arglu12	4.79321706279845e-13	0.281129991471917	0.418	0.319	9.68757100562195e-09	4
Nedd4	1.74435470349278e-11	0.250765964023698	0.415	0.328	3.52551529122925e-07	4
Tjp12	2.04797869629193e-11	0.31969767715121	0.439	0.348	4.13916974307563e-07	4
Ptk22	4.96118252326028e-11	0.252470860543543	0.396	0.306	1.00270459977614e-06	4
Rabep1	1.53578205631214e-10	0.261811583370885	0.364	0.281	3.10396911401246e-06	4
Vti1a	1.21560673398612e-09	0.25571851504399	0.411	0.337	2.45686277005935e-05	4
Ehbp1	1.93844167479241e-09	0.255820880464564	0.461	0.391	3.91778446892294e-05	4
Nol41	3.72062490704897e-08	0.270232138648111	0.392	0.321	0.000751975499963667	4
Gpm6a	1.27573734301698e-07	0.282536344963215	0.632	0.592	0.00257839274397161	4
Dennd1a	5.3832953871458e-07	0.260892871572293	0.532	0.495	0.0108801783069604	4
Cntn1	3.19070608432187e-06	0.291727843700736	0.619	0.605	0.0644873606702294	4
Nxph11	0	2.80730643880223	0.921	0.099	0	5
Kcnc21	0	2.75564550682237	0.883	0.149	0	5
Grip11	0	2.60875174275596	0.938	0.267	0	5
Galntl61	0	2.36370147537146	0.913	0.328	0	5
Dlgap21	0	2.00992045806755	0.921	0.283	0	5
Etl42	0	1.99627366369541	0.874	0.262	0	5
Col19a1	0	1.92623382212473	0.712	0.051	0	5
Grik12	0	1.8368763341848	0.697	0.123	0	5
Sox61	0	1.67062173228439	0.777	0.072	0	5
Ptprm2	0	1.62227071591609	0.814	0.155	0	5
Gria12	0	1.54442173067956	0.889	0.251	0	5
Rbms31	0	1.49845602930377	0.816	0.17	0	5
Elavl21	0	1.49135013664866	0.812	0.136	0	5
Kcnmb2	0	1.47780679055839	0.702	0.045	0	5
Sst	0	1.35426665778206	0.402	0.013	0	5
Pam2	0	1.29983993804932	0.831	0.216	0	5
Satb11	0	0.99855531665521	0.611	0.091	0	5
Eya4	0	0.859921695325369	0.4	0.017	0	5
Iqgap2	0	0.824934070581257	0.459	0.061	0	5
Kcnip11	0	0.808838819369451	0.549	0.081	0	5
Alk1	0	0.781771953052017	0.489	0.06	0	5
Gm1604a	0	0.629702809350826	0.444	0.049	0	5
Rab3b	0	0.609599377453956	0.382	0.018	0	5
Cntnap3	0	0.600471091972847	0.369	0.013	0	5
Dlx6os1	0	0.59214820566651	0.409	0.021	0	5
Gad2	0	0.572211371433775	0.467	0.056	0	5
Rnf144b	0	0.523086590641758	0.37	0.028	0	5
Moxd1	0	0.517929050623211	0.251	0.003	0	5
Tmem44	0	0.462631982362166	0.33	0.029	0	5
Fndc1	0	0.452429365929684	0.31	0.02	0	5
E430024P14Rik	0	0.412469081357301	0.296	0.022	0	5
Thrb2	3.37793119657329e-299	1.36943533182277	0.769	0.203	6.82713674139429e-295	5
Gad1	3.77820811335649e-290	0.582965715398813	0.42	0.053	7.6361364179048e-286	5
Lypd6b	2.89777409212923e-284	0.453791382139433	0.276	0.023	5.85669121760239e-280	5
Maf	4.44844952364457e-279	1.1095313941549	0.616	0.125	8.99076133223805e-275	5
Slc6a12	3.01555947833105e-270	0.709402312389776	0.6	0.113	6.09474726165488e-266	5
Cntnap5c	3.7670350372214e-268	0.844982053417108	0.43	0.061	7.61355451372817e-264	5
Afap1	2.27682366623882e-266	0.474003107681171	0.345	0.039	4.60168831183529e-262	5
Cdh131	6.76407074806259e-261	1.42570525641555	0.611	0.132	1.36708633889093e-256	5
Xkr42	2.09939539654797e-256	1.66790467201582	0.94	0.548	4.24308803596311e-252	5
Sh3rf31	9.0783713928726e-253	0.849677632800632	0.554	0.109	1.83482964221348e-248	5
Cntnap5a2	2.30389651667302e-247	1.20611852342312	0.695	0.168	4.65640524984783e-243	5
Vwc2	2.03580033779949e-246	0.548283630667549	0.365	0.047	4.11455606272654e-242	5
Vstm2a	3.39442243230233e-243	0.478982372965928	0.345	0.042	6.86046717792623e-239	5
Gpr176	3.63414757836881e-243	0.417841700453301	0.3	0.032	7.34497567064121e-239	5
Cdh9	1.64081774814614e-240	1.03174809076528	0.407	0.061	3.31625675077817e-236	5
Neto11	2.20966790570545e-239	1.00120518913422	0.501	0.094	4.46595980422129e-235	5
Gabrg32	5.06756399638193e-239	1.61083755243179	0.698	0.197	1.02420535930875e-234	5
Epha62	6.91041876329906e-239	1.20854716066166	0.75	0.195	1.39666473625037e-234	5
Snhg112	7.42045723133444e-236	1.49708741100901	0.982	0.519	1.499748611025e-231	5
Trpc4	1.01537116243795e-235	0.578785175617723	0.35	0.045	2.05216665640334e-231	5
St8sia4	2.33891872520264e-233	0.3782254837016	0.27	0.027	4.72718863550706e-229	5
Meg32	1.57749332530571e-231	1.46739451396831	0.997	0.813	3.18827175977538e-227	5
Rasgrf22	5.90820059223058e-230	0.656691645417072	0.509	0.095	1.19410642169572e-225	5
Robo22	8.54691185514325e-226	1.05191806890983	0.755	0.216	1.727416355043e-221	5
6330411D24Rik1	3.86339228556313e-221	0.955691903248953	0.382	0.057	7.80830214835164e-217	5
Mkx	3.99295600386087e-218	0.546347043885924	0.402	0.064	8.0701633794032e-214	5
Mpped11	1.39556319090676e-213	0.467682105672962	0.389	0.06	2.82057276514165e-209	5
Sntg12	3.48227766987361e-211	1.38582343479975	0.864	0.357	7.03803139858154e-207	5
Sox2ot1	2.02277078875452e-206	1.24857451320468	0.581	0.132	4.08822204115176e-202	5
Nhs1	5.28394219151441e-205	0.617166737914718	0.526	0.11	1.06793755632698e-200	5
Dlx1as	7.10102461940992e-203	0.352075653630256	0.253	0.027	1.43518808582894e-198	5
Mef2c1	7.19562182552945e-199	1.13685064775571	0.693	0.208	1.45430712715776e-194	5
Klf122	6.23241608470564e-197	1.17010973134735	0.809	0.313	1.25963361487986e-192	5
Myo16	1.31570672991754e-194	0.669331895196854	0.553	0.125	2.65917487183634e-190	5
Utrn1	1.40870734618836e-192	0.87175917569212	0.616	0.164	2.8471384173813e-188	5
Zeb22	1.46452177773183e-191	0.836465359904562	0.764	0.227	2.9599449649738e-187	5
Tafa22	1.07425592442288e-190	1.30467485925136	0.59	0.158	2.17117864885108e-186	5
Cacna2d21	6.56745637836305e-187	0.587269293449048	0.491	0.107	1.32734860863096e-182	5
Ptchd4	3.59875953773165e-186	0.856229860647268	0.63	0.177	7.27345290170944e-182	5
Gria32	3.61327790983526e-184	0.911253366874648	0.759	0.24	7.30279598356803e-180	5
Tox3	1.15371510992671e-183	0.483184723827197	0.357	0.058	2.33177360867287e-179	5
Cntnap21	8.32769584424424e-183	1.82916003228347	0.985	0.835	1.6831106070802e-178	5
Spock32	1.14349741719383e-179	0.830668632521954	0.678	0.197	2.31112262989045e-175	5
Tm6sf1	1.49108341183974e-178	0.344021366572778	0.27	0.035	3.01362868366931e-174	5
Grin2b2	1.63860820016346e-178	1.00570713056216	0.894	0.388	3.31179103335037e-174	5
Pvt1	8.601630685857e-177	0.542863002183037	0.439	0.09	1.73847557791856e-172	5
Nrxn3	2.34156722016197e-176	1.24367082623955	0.997	0.907	4.73254150866936e-172	5
Grm52	4.01930961261422e-176	1.24151218178285	0.881	0.393	8.12342665805459e-172	5
Tcf4	7.0242796873187e-176	1.11822690592841	0.965	0.826	1.41967716760398e-171	5
9630014M24Rik	2.23889427593579e-174	0.516002075381466	0.412	0.08	4.52502922109383e-170	5
Runx21	6.41751778865113e-174	0.679537094880725	0.385	0.073	1.29704452026428e-169	5
Klhl321	1.02711291902046e-173	0.673957497281952	0.556	0.144	2.07589792063226e-169	5
Samd51	5.69087062073614e-173	0.505915928730392	0.399	0.075	1.15018186115698e-168	5
Nek7	1.03690261991821e-172	0.491020776241165	0.323	0.051	2.09568388511669e-168	5
Arnt21	1.52645506296822e-172	0.641517336869268	0.529	0.132	3.08511832776507e-168	5
Btbd111	2.81413850070353e-172	0.680830951093686	0.43	0.09	5.68765532377191e-168	5
Dlg22	8.97082187630176e-171	1.29325361564618	0.98	0.829	1.81309280941935e-166	5
Coro6	1.46124000881644e-168	0.350072383214001	0.288	0.042	2.95331218181891e-164	5
Erbb43	1.20880536649883e-166	2.83707967853226	0.791	0.406	2.44311652623079e-162	5
Cit2	3.88409873766036e-161	0.81175069238862	0.66	0.22	7.85015195868536e-157	5
Fgf121	7.29027486712891e-157	1.18691416177465	0.973	0.829	1.47343745339542e-152	5
Nebl2	1.8362430658637e-155	0.7631336308836	0.72	0.252	3.71123086041713e-151	5
Gm19938	2.03346094186789e-155	0.335138384688814	0.285	0.044	4.1098279096092e-151	5
Hcn1	1.10146164997867e-151	1.02584940721394	0.774	0.329	2.2261641407719e-147	5
Cemip	4.44557266216342e-151	0.607944024267207	0.308	0.054	8.9849469074985e-147	5
Dlgap12	4.38927681044532e-150	1.07693613350171	0.988	0.875	8.87116736159105e-146	5
Dlc1	2.59046198149469e-149	0.616821881455182	0.596	0.176	5.23558271079891e-145	5
Npas32	1.21911418431485e-148	1.16129502456416	0.677	0.226	2.46395167791874e-144	5
Limch12	1.12604085797039e-147	0.902076028238465	0.804	0.365	2.27584117804396e-143	5
Adra1a	3.14223327323525e-146	0.374726155092745	0.25	0.036	6.35076766853576e-142	5
Dcx	8.87636063399378e-146	0.378175493799255	0.332	0.062	1.79400124773648e-141	5
Gm136291	2.07000687185005e-145	0.563753061440935	0.425	0.099	4.18369088869613e-141	5
Frmd51	8.87125385852185e-144	0.897876020094658	0.886	0.471	1.79296911734585e-139	5
Kcnab11	2.48118910988208e-143	0.849280561922003	0.61	0.203	5.01473130998266e-139	5
Robo13	3.25871483020941e-142	1.1832221866436	0.819	0.401	6.58618854333624e-138	5
Grin3a1	3.84220178975408e-141	1.08265402926772	0.39	0.093	7.76547403727196e-137	5
Epha52	3.02691215265668e-140	1.00028699086747	0.749	0.31	6.11769215173441e-136	5
Il1rapl21	3.64342115541312e-139	1.80414204122994	0.347	0.073	7.36371849720545e-135	5
Chrm32	5.9796785327671e-139	0.974966099288923	0.554	0.162	1.20855282825756e-134	5
Csmd12	1.77782714454199e-136	1.16302043865875	0.946	0.587	3.59316644183381e-132	5
Thsd7a1	1.82907697711207e-133	1.12776619085051	0.464	0.131	3.69674747844121e-129	5
Zmat42	1.46069937303171e-132	0.578907604896243	0.457	0.116	2.95221950283439e-128	5
Arhgap181	6.64660201097223e-132	0.398382784896851	0.332	0.066	1.3433447324376e-127	5
Slc44a5	4.06384419259535e-131	0.562139643122472	0.404	0.097	8.21343549765446e-127	5
Hunk	7.93177278705012e-131	0.353279355253214	0.266	0.045	1.6030905979907e-126	5
Gm1992	1.18233157292874e-130	0.315090185209945	0.263	0.044	2.38961034204627e-126	5
Dner1	7.10955596696605e-130	0.493252276949897	0.484	0.13	1.43691235648351e-125	5
Nrg32	1.80677261720534e-129	1.07748766281655	0.98	0.747	3.65166813663371e-125	5
Plppr5	2.01793973996309e-128	0.396123985248186	0.342	0.072	4.07845800843941e-124	5
Rian2	5.17418412188365e-128	0.81674383118083	0.925	0.577	1.0457543528739e-123	5
Osbpl3	1.83381444668539e-126	0.521061402730273	0.42	0.108	3.70632237819584e-122	5
4930517O19Rik	8.0393080579317e-125	0.378604292271924	0.31	0.061	1.62482455158858e-120	5
Prkn3	5.72694287482851e-123	0.97232343134188	0.866	0.504	1.15747242443159e-118	5
C530008M17Rik1	1.15614467392948e-121	0.441040523971559	0.461	0.125	2.33668400047886e-117	5
Esrrg1	4.97813895155614e-121	0.706845725464707	0.563	0.185	1.00613166349901e-116	5
Kctd161	7.46301570108269e-121	0.762501814094475	0.69	0.261	1.50835010334582e-116	5
Plcb12	2.26896717302662e-120	0.918031001861501	0.881	0.493	4.58580955340411e-116	5
Ppargc1a1	1.17400349186773e-119	0.485065492520856	0.415	0.108	2.37277845741386e-115	5
Mgat4c2	3.64861777913787e-119	1.34031111252755	0.621	0.226	7.37422139341555e-115	5
Kcnma12	2.13439927837762e-117	0.695105972178949	0.868	0.419	4.313834381529e-113	5
Pcdh152	2.45228739909453e-116	0.899702183082047	0.662	0.256	4.95631806230996e-112	5
Fmn11	2.82080708698918e-116	0.603660487345973	0.459	0.134	5.70113320351383e-112	5
A230006K03Rik2	5.98384557660823e-116	0.73393958527585	0.578	0.199	1.20939502948829e-111	5
Pak32	1.92865367027125e-115	0.546388459836448	0.528	0.167	3.89800193298523e-111	5
Adamts17	2.28850258296278e-115	0.416233245477283	0.303	0.064	4.62529257042608e-111	5
Las1l1	3.1474487694496e-115	0.494091682349771	0.489	0.149	6.36130870793459e-111	5
Slit22	1.53762601698433e-114	0.872316735029743	0.404	0.11	3.10769594292703e-110	5
Ano41	1.63465752099876e-114	0.541400611802672	0.526	0.161	3.3038063156906e-110	5
St6galnac51	6.03744702958636e-114	0.5496235669108	0.384	0.097	1.2202284191497e-109	5
Lrrtm42	3.66431656383382e-113	1.1707201783482	0.796	0.419	7.40595020716454e-109	5
Frmpd3	4.13356705521967e-112	0.322421603480528	0.258	0.048	8.35435237530449e-108	5
Ppp2r2b3	2.33650117034062e-111	0.801172224621502	0.772	0.371	4.72230251537543e-107	5
Spats2l	2.41608153438259e-111	0.382682046260483	0.31	0.067	4.88314238914065e-107	5
Cntn52	5.28004632137765e-111	1.45685487223067	0.635	0.267	1.06715016201364e-106	5
Flt3	1.33241849863122e-110	0.323924732283538	0.261	0.049	2.69295102758355e-106	5
Sox52	1.41195243814819e-110	0.874158611344421	0.499	0.163	2.85369707274131e-106	5
Scn9a1	1.41267977694529e-110	0.362089983497276	0.33	0.074	2.85516709718413e-106	5
Tmem132b1	2.63520970876004e-110	0.580955194592054	0.486	0.151	5.32602234237492e-106	5
Atrnl12	5.09021573392494e-110	0.81787678390866	0.583	0.217	1.02878350198357e-105	5
Ctnnd21	1.99564240967584e-107	0.822163991907627	0.946	0.802	4.03339287419585e-103	5
Tenm42	1.46775442840332e-105	0.57579528887944	0.66	0.241	2.96647847524594e-101	5
Zfp804a1	1.53251121153197e-105	0.877410194756036	0.523	0.184	3.09735840962726e-101	5
Agbl42	4.86930511559785e-105	0.604370185548849	0.735	0.31	9.84135256913481e-101	5
Mdga23	5.75920491326169e-105	0.81841317501673	0.916	0.53	1.16399290501932e-100	5
Plxna42	2.39774031431863e-104	0.676002189086301	0.601	0.234	4.84607294926938e-100	5
Plekhh2	3.64042863033935e-104	0.306513779590578	0.263	0.052	7.35767030477886e-100	5
Frmd4a3	1.45194129658785e-102	0.592262243294432	0.893	0.465	2.93451855453371e-98	5
A330015K06Rik	1.4635874309554e-102	0.40211995385753	0.37	0.096	2.95805655670396e-98	5
Far2	2.18288688576175e-102	0.328740275244454	0.275	0.058	4.41183268481307e-98	5
Csrnp32	8.07547870963682e-102	0.593031887554693	0.618	0.241	1.6321350020047e-97	5
Cadps3	1.63697779581969e-101	0.727370036432599	0.876	0.564	3.30849582313117e-97	5
Atp1b11	1.85572698297849e-101	0.596972194570948	0.652	0.274	3.75060980529782e-97	5
Lrrfip12	2.00409506842578e-99	0.441929827565991	0.436	0.133	4.05047654279533e-95	5
Stxbp62	2.84239560832065e-98	0.506633385623803	0.385	0.107	5.74476576397687e-94	5
Cers6	7.68416324457571e-98	0.636170741218039	0.704	0.323	1.5530462333612e-93	5
Nav11	5.23540408074419e-97	0.440267298670591	0.504	0.168	1.05812751875921e-92	5
Ntrk22	1.15025458277247e-95	0.692326813315796	0.834	0.478	2.32477953724143e-91	5
Opcml2	9.68781554887369e-95	1.12815276102733	0.915	0.734	1.95800440058286e-90	5
Gm326471	1.46541732583075e-94	0.611940302974139	0.283	0.064	2.96175495723652e-90	5
Lancl1	2.32932829424379e-94	0.367742302805774	0.313	0.078	4.70780541549613e-90	5
Bcl11b	3.14515185072645e-94	0.316692201361663	0.273	0.06	6.35666640550323e-90	5
Plppr11	1.86873432453912e-93	0.360031871860121	0.305	0.074	3.77689894332602e-89	5
Tenm22	7.2334495513689e-93	0.942590241551324	0.901	0.626	1.46195248882717e-88	5
Ripor2	3.26120410380904e-90	0.362907357575169	0.31	0.078	6.59121961420844e-86	5
Trerf12	4.21803700596417e-90	0.42781578788225	0.481	0.162	8.52507459275417e-86	5
[truncated: 4,903 more rows]
