# Supplementary material for: Spatially resolved multiomics on the neuronal effects induced by spaceflight
Source: Research Square preprint supplement (doi:10.21203/rs.3.rs-2865086/v1), 2023-05-31
Supplement: Supplementary file 10 [file feaaff89069b87fe960b55fa.xlsx]

## Sheet: Sheet4
Supplementary Table 3: Differentially expressed genes (DEGs) for multiomics clusters. DEGs identified for the 18 multiomics clusters in the spaceflight samples of RR3 brain data.
Gene	logFC	P-value	FDR	cluster	organ
Kcnc2	0.2989	3.80E-05	3.60E-02	2	brain
Aplp1	-0.3889	1.70E-04	4.30E-02	3	brain
Plp1	-0.3694	1.20E-04	4.30E-02	3	brain
Atp1a2	0.0679	6.60E-04	2.70E-02	4	brain
Auts2	0.2447	2.20E-03	4.40E-02	4	brain
B3galt1	0.4571	2.30E-04	1.20E-02	4	brain
Cadm1	0.534	4.70E-05	6.20E-03	4	brain
Cpe	0.4528	1.20E-04	9.20E-03	4	brain
Ctnnd2	0.42	2.20E-04	1.20E-02	4	brain
Dclk1	0.4234	1.10E-04	9.20E-03	4	brain
Dtna	0.4649	2.60E-03	4.90E-02	4	brain
Fars2	0.4525	1.80E-03	4.00E-02	4	brain
Frmd4a	0.647	4.80E-06	1.30E-03	4	brain
Gm20713	0.1798	1.10E-03	3.30E-02	4	brain
Gpc5	1.0156	1.60E-04	1.10E-02	4	brain
Gria2	0.6461	7.20E-04	2.70E-02	4	brain
Grm3	0.4634	1.90E-03	4.00E-02	4	brain
Lrrtm4	-0.0254	8.30E-04	3.00E-02	4	brain
Luc7l2	0.2907	7.20E-04	2.70E-02	4	brain
Luzp2	0.381	2.40E-03	4.50E-02	4	brain
Macf1	0.4739	1.10E-03	3.30E-02	4	brain
Mir99ahg	0.647	3.50E-05	6.20E-03	4	brain
Msi2	0.6659	1.40E-03	3.40E-02	4	brain
Ntm	0.565	2.80E-03	4.90E-02	4	brain
Pbx1	0.4533	1.70E-03	3.90E-02	4	brain
Prex2	0.5192	3.70E-04	1.80E-02	4	brain
Prkn	0.2893	1.20E-03	3.30E-02	4	brain
Ptprt	0.4433	1.30E-03	3.40E-02	4	brain
Ptprz1	0.5102	1.20E-03	3.30E-02	4	brain
Rian	0.0064	1.20E-03	3.30E-02	4	brain
Slc1a2	0.7564	8.30E-05	8.80E-03	4	brain
Slc1a3	0.648	1.50E-06	8.30E-04	4	brain
Trps1	0.4265	2.00E-03	4.00E-02	4	brain
2022-03-01	0.4517	2.30E-04	1.10E-02	5	brain
2210408F21Rik	0.238	8.30E-03	3.50E-02	5	brain
5330434G04Rik	0.3582	6.90E-04	1.40E-02	5	brain
9330182L06Rik	0.1926	3.30E-03	2.30E-02	5	brain
9630014M24Rik	0.2791	1.20E-03	1.70E-02	5	brain
A230006K03Rik	0.5833	1.90E-04	1.10E-02	5	brain
A230057D06Rik	0.5109	1.10E-03	1.70E-02	5	brain
A330076H08Rik	0.4325	4.10E-03	2.50E-02	5	brain
A830018L16Rik	0.2504	1.50E-02	4.60E-02	5	brain
Ablim1	0.0056	3.50E-03	2.40E-02	5	brain
Abr	0.275	8.00E-03	3.40E-02	5	brain
AC149090.1	0.556	3.20E-03	2.30E-02	5	brain
Acbd6	0.2161	1.40E-02	4.50E-02	5	brain
Adam22	0.2123	1.50E-02	4.70E-02	5	brain
Adcy8	0.2108	1.40E-02	4.60E-02	5	brain
Adgrl3	0.6429	4.10E-04	1.20E-02	5	brain
Afap1	0.2609	3.00E-03	2.20E-02	5	brain
Aff2	0.2309	8.80E-03	3.70E-02	5	brain
Agbl4	0.6332	2.60E-04	1.20E-02	5	brain
Ahi1	0.5962	1.30E-03	1.70E-02	5	brain
Akap8l	0.1174	7.90E-03	3.40E-02	5	brain
Alk	0.3573	6.00E-03	3.10E-02	5	brain
Ank	0.2149	1.20E-02	4.20E-02	5	brain
Ankrd17	0.3071	6.30E-03	3.10E-02	5	brain
Anks1b	0.4028	1.20E-02	4.20E-02	5	brain
Apc	0.3928	3.00E-03	2.20E-02	5	brain
Arfgef3	0.2094	7.10E-03	3.20E-02	5	brain
Arhgap32	0.2773	6.60E-03	3.10E-02	5	brain
Arhgef12	0.2782	7.50E-03	3.30E-02	5	brain
Arih1	0.277	1.80E-03	1.90E-02	5	brain
Arl15	0.2551	1.20E-02	4.20E-02	5	brain
Arnt2	0.4445	7.90E-04	1.50E-02	5	brain
Arpp21	-0.3479	4.40E-03	2.50E-02	5	brain
Asb3	0.188	1.40E-03	1.70E-02	5	brain
Ash1l	0.1927	1.50E-03	1.70E-02	5	brain
Asic2	0.4707	1.70E-03	1.80E-02	5	brain
Astn1	0.406	2.90E-04	1.20E-02	5	brain
Atp11b	0.4313	1.30E-03	1.70E-02	5	brain
Atp1a3	0.2976	6.70E-03	3.10E-02	5	brain
Atp1b1	0.2914	2.50E-03	2.10E-02	5	brain
Atp6v0a1	0.1679	3.30E-03	2.30E-02	5	brain
Atp6v0b	0.2094	1.50E-02	4.70E-02	5	brain
Atrnl1	0.5611	1.10E-02	4.00E-02	5	brain
Atxn1	0.3613	9.60E-03	3.80E-02	5	brain
B3galt1	0.3851	2.20E-03	1.90E-02	5	brain
B830012L14Rik	0.3395	6.80E-03	3.10E-02	5	brain
Bach2	0.3289	1.20E-02	4.20E-02	5	brain
Bcl11a	0.3394	2.00E-03	1.90E-02	5	brain
Braf	0.272	3.50E-03	2.30E-02	5	brain
Brinp2	0.2322	1.60E-02	4.90E-02	5	brain
Brinp3	-0.0141	1.50E-02	4.60E-02	5	brain
Brwd1	0.2367	6.70E-03	3.10E-02	5	brain
Btbd11	0.3677	6.40E-03	3.10E-02	5	brain
Btbd9	-0.0099	5.10E-03	2.80E-02	5	brain
C130071C03Rik	0.4496	4.20E-03	2.50E-02	5	brain
C530008M17Rik	0.2682	1.00E-02	3.90E-02	5	brain
Cacna1b	0.3378	1.00E-03	1.70E-02	5	brain
Cacna1d	0.355	1.20E-03	1.70E-02	5	brain
Cacna2d1	-0.4395	3.80E-03	2.40E-02	5	brain
Cacna2d3	0.5269	3.20E-03	2.30E-02	5	brain
Cadps	0.7966	2.30E-04	1.10E-02	5	brain
Cadps2	-0.5756	3.90E-03	2.40E-02	5	brain
Caln1	-0.2715	2.20E-03	1.90E-02	5	brain
Camk2a	0.2278	1.60E-03	1.70E-02	5	brain
Camk4	-0.3539	5.40E-05	7.50E-03	5	brain
Camta1	0.449	1.50E-03	1.70E-02	5	brain
Car10	-0.788	4.00E-04	1.20E-02	5	brain
Casc4	0.2486	6.40E-03	3.10E-02	5	brain
Ccdc136	0.2541	2.20E-03	1.90E-02	5	brain
Ccdc85a	0.2538	8.10E-03	3.40E-02	5	brain
Ccser1	0.5358	9.90E-03	3.90E-02	5	brain
Cdc42bpa	0.0485	9.80E-03	3.90E-02	5	brain
Cdh13	0.5197	4.10E-03	2.50E-02	5	brain
Cdh9	0.4232	9.70E-03	3.90E-02	5	brain
Cdr1os	0.3497	1.50E-02	4.60E-02	5	brain
Celf1	0.0654	9.40E-04	1.60E-02	5	brain
Celf2	0.5545	1.50E-03	1.70E-02	5	brain
Celf4	0.2717	3.20E-03	2.30E-02	5	brain
Chd6	0.297	8.60E-03	3.60E-02	5	brain
Chn1	0.1914	3.20E-03	2.30E-02	5	brain
Chn2	-0.4708	3.50E-04	1.20E-02	5	brain
Chrm3	0.6175	3.40E-04	1.20E-02	5	brain
Cit	0.4917	1.10E-03	1.70E-02	5	brain
Cntn3	0.4138	1.10E-03	1.70E-02	5	brain
Cntn4	0.4838	7.30E-04	1.50E-02	5	brain
Cntnap2	0.9464	3.70E-03	2.40E-02	5	brain
Cntnap5a	0.8758	1.80E-05	7.50E-03	5	brain
Cntnap5c	0.4441	6.30E-03	3.10E-02	5	brain
Col19a1	0.9328	2.20E-04	1.10E-02	5	brain
Cplane1	0.4778	4.50E-04	1.20E-02	5	brain
Csmd1	1.0383	1.70E-04	1.10E-02	5	brain
Csmd3	0.3045	2.20E-03	1.90E-02	5	brain
Csrnp3	0.4494	8.50E-04	1.60E-02	5	brain
Ctnna2	0.4994	2.10E-03	1.90E-02	5	brain
Ctnnd2	0.6467	2.00E-03	1.90E-02	5	brain
Cttnbp2	0.4138	1.20E-02	4.20E-02	5	brain
Dclk1	0.496	1.50E-03	1.70E-02	5	brain
Ddx5	-0.2559	3.60E-03	2.40E-02	5	brain
Ddx50	0.1557	9.30E-03	3.80E-02	5	brain
Dennd1a	0.3172	2.60E-03	2.10E-02	5	brain
Dennd5b	0.2889	1.20E-02	4.20E-02	5	brain
Dgkg	0.3295	1.50E-02	4.60E-02	5	brain
Dgki	0.4773	1.80E-03	1.80E-02	5	brain
Dlc1	0.3715	1.50E-03	1.70E-02	5	brain
Dlg2	1.2309	2.00E-04	1.10E-02	5	brain
Dlgap1	0.6764	3.00E-03	2.20E-02	5	brain
Dlgap2	1.2876	4.60E-03	2.60E-02	5	brain
Dlx6os1	0.338	3.60E-03	2.40E-02	5	brain
Dmd	0.6049	4.50E-03	2.60E-02	5	brain
Dnajc1	0.0578	6.10E-04	1.40E-02	5	brain
Dner	0.2562	1.70E-02	4.90E-02	5	brain
Dnm3	0.2983	5.20E-03	2.80E-02	5	brain
Dock3	0.4069	4.60E-03	2.60E-02	5	brain
Dpp10	0.4243	6.60E-03	3.10E-02	5	brain
Edil3	0.3504	1.60E-03	1.70E-02	5	brain
Efna5	0.29	4.30E-03	2.50E-02	5	brain
Efr3a	0.2518	3.40E-03	2.30E-02	5	brain
Ehbp1	0.3716	2.70E-03	2.10E-02	5	brain
Elavl2	0.763	1.50E-04	1.10E-02	5	brain
Elavl3	0.283	1.20E-02	4.20E-02	5	brain
Enox1	0.638	1.80E-03	1.90E-02	5	brain
Epb41l3	0.2266	1.40E-02	4.50E-02	5	brain
Epha6	0.6963	2.10E-03	1.90E-02	5	brain
Erbin	0.2574	1.40E-02	4.60E-02	5	brain
Erc2	0.6914	4.60E-03	2.60E-02	5	brain
Etl4	1.1267	6.50E-03	3.10E-02	5	brain
Evi5	0.2134	9.80E-03	3.90E-02	5	brain
Fam13c	0.2831	1.30E-03	1.70E-02	5	brain
Fam155a	0.5637	1.70E-03	1.80E-02	5	brain
Fam189a1	0.2916	9.00E-03	3.70E-02	5	brain
Far1	0.1309	1.20E-02	4.20E-02	5	brain
Farp1	0.229	8.90E-03	3.70E-02	5	brain
Fbxl17	0.5538	1.50E-02	4.60E-02	5	brain
Fchsd2	0.2934	1.20E-02	4.20E-02	5	brain
Fgf12	0.7866	1.60E-03	1.70E-02	5	brain
Fmnl2	0.0988	2.30E-03	2.00E-02	5	brain
Frmd4a	0.7863	3.40E-04	1.20E-02	5	brain
Frmd4b	0.2678	5.30E-03	2.90E-02	5	brain
Frmd5	0.769	2.00E-03	1.90E-02	5	brain
Frmpd4	0.5183	1.10E-03	1.70E-02	5	brain
Fstl5	0.3428	2.00E-03	1.90E-02	5	brain
Fus	0.1636	7.80E-03	3.40E-02	5	brain
Fyn	0.1908	1.60E-02	4.90E-02	5	brain
Gab2	0.2187	7.90E-03	3.40E-02	5	brain
Gabrg3	0.9894	6.70E-04	1.40E-02	5	brain
Gad1	0.2988	1.00E-02	3.90E-02	5	brain
Gad2	0.3562	3.20E-03	2.30E-02	5	brain
Galntl6	1.5837	4.70E-05	7.50E-03	5	brain
Garnl3	0.367	6.80E-04	1.40E-02	5	brain
Gm13629	0.3651	1.00E-02	4.00E-02	5	brain
Gm1604a	0.335	1.20E-03	1.70E-02	5	brain
Gm9801	0.1931	7.60E-03	3.30E-02	5	brain
Gmds	0.2555	6.50E-03	3.10E-02	5	brain
Gprasp1	0.2071	4.80E-03	2.70E-02	5	brain
Gria1	0.9134	1.70E-02	4.90E-02	5	brain
Gria2	0.6719	1.10E-02	4.10E-02	5	brain
Gria3	0.6724	2.60E-03	2.10E-02	5	brain
Grid1	0.2788	5.60E-03	2.90E-02	5	brain
Grid2	-0.5325	1.90E-03	1.90E-02	5	brain
Grik1	0.8992	3.60E-05	7.50E-03	5	brain
Grik3	0.2333	4.00E-03	2.40E-02	5	brain
Grin2b	0.9389	1.70E-03	1.80E-02	5	brain
Grin3a	0.4571	2.10E-03	1.90E-02	5	brain
Grk3	0.1602	1.30E-02	4.30E-02	5	brain
Grm1	0.075	1.10E-02	4.00E-02	5	brain
Grm5	0.7544	2.00E-03	1.90E-02	5	brain
Gsk3b	0.2222	1.10E-03	1.70E-02	5	brain
Gtdc1	0.2764	1.20E-03	1.70E-02	5	brain
Hdac4	0.2536	2.10E-03	1.90E-02	5	brain
Hdac9	0.245	6.80E-03	3.10E-02	5	brain
Hectd4	0.0399	7.10E-03	3.20E-02	5	brain
Hecw1	0.2036	1.20E-02	4.20E-02	5	brain
Htt	0.2193	8.70E-03	3.60E-02	5	brain
Ica1	0.2181	9.50E-03	3.80E-02	5	brain
Il1rapl2	0.6642	2.00E-04	1.10E-02	5	brain
Iqgap2	0.4662	6.20E-03	3.10E-02	5	brain
Jazf1	0.2169	1.30E-02	4.30E-02	5	brain
Kalrn	0.4929	6.70E-05	7.50E-03	5	brain
Kcnab1	0.5721	3.90E-04	1.20E-02	5	brain
Kcnc2	1.2281	1.20E-02	4.20E-02	5	brain
Kcnh7	0.5423	1.60E-02	4.90E-02	5	brain
Kcnip1	0.473	3.70E-04	1.20E-02	5	brain
Kcnip4	-0.9396	3.10E-03	2.30E-02	5	brain
Kcnma1	0.7653	4.90E-04	1.30E-02	5	brain
Kcnq3	0.4902	8.10E-04	1.50E-02	5	brain
Kcnq5	0.2447	1.00E-02	3.90E-02	5	brain
Kctd16	0.728	5.50E-05	7.50E-03	5	brain
Kif1a	0.2129	5.60E-03	2.90E-02	5	brain
Kirrel3	-0.1154	3.80E-03	2.40E-02	5	brain
Klf12	0.7899	2.50E-03	2.10E-02	5	brain
Klhl29	0.3471	1.10E-02	4.10E-02	5	brain
Klhl32	0.291	8.40E-03	3.60E-02	5	brain
Kmt2a	0.2758	4.10E-03	2.50E-02	5	brain
Large1	0.5837	1.00E-02	3.90E-02	5	brain
Las1l	0.3259	1.40E-02	4.50E-02	5	brain
Lhfp	-0.2576	4.20E-03	2.50E-02	5	brain
Limch1	0.6293	1.40E-02	4.60E-02	5	brain
Lncpint	0.4127	3.60E-03	2.40E-02	5	brain
Lrfn5	0.7428	7.20E-04	1.50E-02	5	brain
Lrp1	0.0252	1.00E-02	3.90E-02	5	brain
Lrrc7	0.7551	4.90E-04	1.30E-02	5	brain
Lrrtm4	0.944	7.00E-03	3.20E-02	5	brain
Lsamp	0.7619	1.50E-02	4.70E-02	5	brain
Luzp2	0.4501	3.30E-03	2.30E-02	5	brain
Maf	0.653	6.60E-03	3.10E-02	5	brain
Magi1	0.5298	1.60E-02	4.70E-02	5	brain
Map7	0.204	1.50E-02	4.60E-02	5	brain
Mapk10	0.5311	4.50E-04	1.20E-02	5	brain
Mast4	0.148	4.90E-03	2.70E-02	5	brain
Mdga2	1.0525	9.40E-03	3.80E-02	5	brain
Med13	0.2337	9.30E-04	1.60E-02	5	brain
Mgat4c	0.7503	9.20E-05	9.30E-03	5	brain
Mir100hg	0.2803	9.80E-03	3.90E-02	5	brain
Mkln1	0.233	3.30E-03	2.30E-02	5	brain
Mmp16	0.4551	3.10E-04	1.20E-02	5	brain
Mpped1	0.3171	4.40E-03	2.60E-02	5	brain
Mtss1	0.1976	5.50E-03	2.90E-02	5	brain
Myef2	0.2262	1.20E-02	4.20E-02	5	brain
Myo16	0.3552	4.80E-03	2.70E-02	5	brain
Myo5a	0.3519	6.80E-03	3.10E-02	5	brain
Myo9a	0.3173	1.30E-02	4.30E-02	5	brain
Nav1	0.3208	1.20E-02	4.20E-02	5	brain
Nav2	0.367	2.90E-03	2.20E-02	5	brain
Nav3	0.6184	1.80E-03	1.90E-02	5	brain
Ncoa1	0.4155	6.90E-03	3.10E-02	5	brain
Ncoa2	0.224	7.40E-03	3.30E-02	5	brain
Ndfip1	0.1716	1.50E-02	4.70E-02	5	brain
Negr1	-0.3408	1.30E-02	4.30E-02	5	brain
Nek1	0.2152	1.20E-02	4.20E-02	5	brain
Nek7	0.2743	1.50E-02	4.70E-02	5	brain
Nell1	0.3058	2.60E-03	2.10E-02	5	brain
Neto1	0.508	3.80E-04	1.20E-02	5	brain
Nfia	-0.3071	2.10E-03	1.90E-02	5	brain
Nfib	-0.2991	1.00E-02	4.00E-02	5	brain
Nipbl	0.197	1.30E-02	4.30E-02	5	brain
Nktr	0.328	1.10E-02	4.00E-02	5	brain
Nlk	0.2612	1.20E-02	4.20E-02	5	brain
Nmt2	0.2472	2.50E-03	2.10E-02	5	brain
Npas3	0.6448	4.10E-03	2.50E-02	5	brain
Nrg3	0.7535	5.10E-03	2.80E-02	5	brain
Nrxn3	0.8351	1.20E-02	4.20E-02	5	brain
Ntrk2	0.4914	7.80E-03	3.40E-02	5	brain
Osbpl6	0.3186	3.70E-03	2.40E-02	5	brain
Pak3	0.427	6.60E-04	1.40E-02	5	brain
Pakap	0.277	4.40E-03	2.50E-02	5	brain
Pam	0.9555	1.20E-04	1.10E-02	5	brain
Pan3	-0.1704	1.10E-02	4.20E-02	5	brain
Parp8	0.189	7.40E-04	1.50E-02	5	brain
Pcca	0.0618	1.20E-02	4.20E-02	5	brain
Pcdh15	0.6858	4.20E-04	1.20E-02	5	brain
Pcdh7	0.4972	2.90E-03	2.20E-02	5	brain
Pcsk2	-0.2451	9.70E-03	3.90E-02	5	brain
Pde4b	-0.4432	2.40E-03	2.00E-02	5	brain
Pigk	0.2555	5.60E-03	2.90E-02	5	brain
Pitpnc1	0.3497	1.10E-03	1.70E-02	5	brain
Pknox2	0.2727	6.50E-03	3.10E-02	5	brain
Plcb1	1.0639	4.30E-05	7.50E-03	5	brain
Plppr5	0.2789	2.60E-03	2.10E-02	5	brain
Plxna4	0.3851	1.40E-02	4.50E-02	5	brain
Polb	0.3611	6.20E-04	1.40E-02	5	brain
Ppip5k2	0.2976	1.50E-02	4.60E-02	5	brain
Ppp2r2b	0.7398	5.20E-04	1.30E-02	5	brain
Ppp3ca	0.1455	7.80E-03	3.40E-02	5	brain
Prickle2	0.3221	5.80E-03	3.00E-02	5	brain
Prkce	0.291	1.30E-02	4.30E-02	5	brain
Prkn	0.6955	8.00E-03	3.40E-02	5	brain
Prpf40a	0.0964	5.80E-03	3.00E-02	5	brain
Pspc1	0.1366	2.00E-03	1.90E-02	5	brain
Ptchd4	0.4392	6.40E-03	3.10E-02	5	brain
Ptk2	0.2039	1.40E-02	4.50E-02	5	brain
Ptprm	0.9537	6.80E-04	1.40E-02	5	brain
Pvt1	0.2673	6.60E-03	3.10E-02	5	brain
Qk	0.3615	3.00E-03	2.20E-02	5	brain
Rab3b	0.3107	1.20E-03	1.70E-02	5	brain
Rab3c	0.3136	3.70E-03	2.40E-02	5	brain
Ralgapa1	0.4198	7.50E-03	3.30E-02	5	brain
Ralyl	-0.3078	2.40E-03	2.00E-02	5	brain
Rapgef6	0.2602	1.20E-03	1.70E-02	5	brain
Rasal2	0.4792	1.10E-02	4.10E-02	5	brain
Rasgrf2	0.3703	1.40E-02	4.50E-02	5	brain
Rbm6	0.2404	7.20E-03	3.20E-02	5	brain
Rbms3	0.9195	9.30E-04	1.60E-02	5	brain
Rc3h2	0.189	6.90E-03	3.10E-02	5	brain
Relch	0.1027	1.20E-02	4.20E-02	5	brain
Reln	0.0842	1.40E-02	4.50E-02	5	brain
Reps2	0.3678	1.90E-04	1.10E-02	5	brain
Rev3l	0.3981	1.50E-03	1.70E-02	5	brain
Rian	0.57	1.50E-03	1.70E-02	5	brain
Rictor	0.1316	1.30E-02	4.40E-02	5	brain
Rimbp2	0.2847	1.30E-03	1.70E-02	5	brain
Robo1	0.9247	1.60E-04	1.10E-02	5	brain
Robo2	0.7482	1.50E-02	4.60E-02	5	brain
Rtn3	0.2957	1.00E-02	3.90E-02	5	brain
Rufy3	0.2838	1.60E-02	4.70E-02	5	brain
Runx1t1	0.2775	3.90E-03	2.40E-02	5	brain
Samd5	0.3333	1.40E-03	1.70E-02	5	brain
Satb1	0.5505	1.50E-03	1.70E-02	5	brain
Scai	0.2313	2.00E-03	1.90E-02	5	brain
Schip1	-0.053	1.50E-02	4.60E-02	5	brain
Scn8a	0.2357	1.70E-02	4.90E-02	5	brain
Sec24b	0.1605	1.30E-02	4.30E-02	5	brain
Sema6d	0.3011	2.00E-03	1.90E-02	5	brain
Sgcz	0.5767	9.10E-03	3.70E-02	5	brain
Sgip1	0.4836	4.20E-03	2.50E-02	5	brain
Sh3kbp1	0.2535	3.80E-04	1.20E-02	5	brain
Sh3rf3	0.4746	1.50E-03	1.70E-02	5	brain
Sipa1l1	0.3625	1.60E-03	1.70E-02	5	brain
Slc24a2	0.543	8.80E-04	1.60E-02	5	brain
Slc24a3	0.3251	9.30E-03	3.80E-02	5	brain
Slc25a12	0.2696	1.50E-03	1.70E-02	5	brain
Slc2a13	0.264	1.30E-02	4.40E-02	5	brain
Slc35f1	0.3409	1.10E-03	1.70E-02	5	brain
Slc38a2	0.1437	6.50E-03	3.10E-02	5	brain
Slc6a1	0.4216	6.30E-04	1.40E-02	5	brain
Slc8a1	0.345	1.50E-03	1.70E-02	5	brain
Smarca2	0.2285	1.50E-02	4.60E-02	5	brain
Smg1	-0.013	7.60E-03	3.30E-02	5	brain
Snap91	0.4449	2.70E-03	2.10E-02	5	brain
Snhg11	1.0414	2.80E-04	1.20E-02	5	brain
Snhg14	0.549	2.60E-03	2.10E-02	5	brain
Snrpn	0.1959	1.10E-02	4.00E-02	5	brain
Sntg1	1.0058	1.70E-04	1.10E-02	5	brain
Snx29	0.0866	1.20E-02	4.20E-02	5	brain
Sorbs2	0.5586	6.10E-03	3.10E-02	5	brain
Sox2ot	0.6539	3.10E-04	1.20E-02	5	brain
Sox5	0.5321	1.00E-02	3.90E-02	5	brain
Sox6	1.0033	1.10E-03	1.70E-02	5	brain
Sphkap	-0.1896	5.40E-03	2.90E-02	5	brain
Spock1	0.2854	4.10E-03	2.50E-02	5	brain
Spock3	0.5497	5.80E-03	3.00E-02	5	brain
Srcin1	0.1744	1.60E-02	4.90E-02	5	brain
Srpk2	0.2831	1.20E-02	4.20E-02	5	brain
Ssbp2	0.3894	3.10E-03	2.30E-02	5	brain
Sst	0.4979	3.80E-04	1.20E-02	5	brain
St7	0.2065	3.40E-03	2.30E-02	5	brain
Stox2	0.2405	3.80E-03	2.40E-02	5	brain
Strn3	0.2959	1.30E-02	4.30E-02	5	brain
Stxbp5	0.2676	1.00E-02	3.90E-02	5	brain
Synj1	0.1846	2.00E-05	7.50E-03	5	brain
Syt11	0.1675	1.50E-02	4.60E-02	5	brain
Tafa2	0.639	1.40E-03	1.70E-02	5	brain
Tanc2	0.4892	7.70E-04	1.50E-02	5	brain
Tcf20	0.2756	2.90E-03	2.20E-02	5	brain
Tcf4	0.8516	1.50E-02	4.60E-02	5	brain
Tenm4	0.4379	5.00E-03	2.70E-02	5	brain
Tet2	0.2301	1.00E-02	3.90E-02	5	brain
Thrb	0.8341	6.20E-05	7.50E-03	5	brain
Thsd7a	0.5333	6.60E-04	1.40E-02	5	brain
Tmem132b	0.3922	1.20E-02	4.20E-02	5	brain
Tmem178b	0.3491	1.50E-02	4.60E-02	5	brain
Tnrc6a	0.3499	6.80E-03	3.10E-02	5	brain
Tom1l2	0.1402	1.00E-02	3.90E-02	5	brain
Tox3	0.2837	6.20E-03	3.10E-02	5	brain
Trim2	0.4711	2.70E-03	2.10E-02	5	brain
Trim9	0.2776	3.40E-03	2.30E-02	5	brain
Trip12	0.3304	2.20E-03	1.90E-02	5	brain
Trpm3	-0.7601	7.60E-03	3.30E-02	5	brain
Trps1	0.2618	1.40E-02	4.50E-02	5	brain
Tshz3	0.2741	7.20E-03	3.20E-02	5	brain
Ttc19	0.2693	1.50E-02	4.60E-02	5	brain
Ube2e2	0.2997	5.20E-03	2.80E-02	5	brain
Ube2g1	0.1606	1.30E-02	4.30E-02	5	brain
Ubr3	0.5291	1.70E-02	4.90E-02	5	brain
Ubr5	0.2543	5.90E-03	3.00E-02	5	brain
Ulk2	0.2344	9.60E-03	3.90E-02	5	brain
Usp29	0.3972	1.00E-03	1.70E-02	5	brain
Utrn	0.5431	4.50E-03	2.60E-02	5	brain
Vps13b	0.4071	1.30E-02	4.40E-02	5	brain
Vps13d	0.1227	1.10E-02	4.00E-02	5	brain
Vstm2a	0.2469	3.60E-03	2.40E-02	5	brain
Vwc2	0.2938	6.00E-03	3.10E-02	5	brain
Zbtb20	-0.731	4.60E-04	1.20E-02	5	brain
Zeb2	0.6592	1.20E-05	7.50E-03	5	brain
Zfp207	0.107	1.70E-02	4.90E-02	5	brain
Zfp804a	0.4519	5.50E-03	2.90E-02	5	brain
Zfp804b	0.4516	2.20E-03	1.90E-02	5	brain
Zmat4	0.3649	1.20E-03	1.70E-02	5	brain
Zmynd11	0.2109	1.30E-02	4.40E-02	5	brain
Zmynd8	0.2484	6.00E-03	3.10E-02	5	brain
Zswim6	0.3519	4.10E-03	2.50E-02	5	brain
Zzef1	0.2746	9.10E-03	3.70E-02	5	brain
Sparc	-0.3808	2.00E-06	1.30E-03	7	brain
Arhgap24	0.3357	1.70E-04	3.30E-02	9	brain
Csmd1	1.034	4.50E-04	3.30E-02	9	brain
Csmd3	0.7802	5.60E-04	3.30E-02	9	brain
Dscam	0.9201	6.30E-04	3.30E-02	9	brain
Epn2	0.7013	2.90E-04	3.30E-02	9	brain
Gria2	0.7389	4.40E-04	3.30E-02	9	brain
Lhfpl3	0.9694	5.30E-04	3.30E-02	9	brain
Lrp1b	0.8432	7.00E-04	3.30E-02	9	brain
Luzp2	0.6908	6.60E-04	3.30E-02	9	brain
Plcb1	0.6056	3.20E-04	3.30E-02	9	brain
Ptprz1	0.8991	3.50E-04	3.30E-02	9	brain
Samd12	0.2841	1.00E-03	4.10E-02	9	brain
Sorbs2	0.2814	9.20E-04	4.10E-02	9	brain
4930402H24Rik	0.3732	1.20E-02	4.80E-02	11	brain
5330434G04Rik	0.4779	4.30E-03	3.20E-02	11	brain
5730522E02Rik	0.4963	4.30E-05	6.90E-03	11	brain
A830018L16Rik	0.8025	1.30E-03	1.90E-02	11	brain
AC149090.1	0.4869	2.20E-03	2.40E-02	11	brain
Acap2	0.2365	5.10E-03	3.30E-02	11	brain
Adamts17	0.4731	2.90E-03	2.70E-02	11	brain
Adarb2	1.8366	5.00E-04	1.30E-02	11	brain
Adra1a	0.3425	1.40E-03	1.90E-02	11	brain
Akap9	0.2308	4.80E-03	3.20E-02	11	brain
Alcam	0.4249	4.20E-04	1.20E-02	11	brain
Alk	0.5421	1.60E-04	8.90E-03	11	brain
App	0.3047	2.40E-03	2.50E-02	11	brain
Appl2	-0.2509	4.60E-03	3.20E-02	11	brain
Arglu1	0.2951	1.00E-02	4.50E-02	11	brain
Arhgap26	-0.2116	3.70E-03	3.00E-02	11	brain
Asap1	0.3601	3.80E-03	3.10E-02	11	brain
Astn1	0.315	6.50E-03	3.60E-02	11	brain
Atp11b	0.3724	4.90E-03	3.20E-02	11	brain
Atp11c	0.2185	5.50E-03	3.40E-02	11	brain
Atp1a3	0.2406	1.20E-02	4.90E-02	11	brain
Atp6v0a1	0.2594	7.20E-03	3.90E-02	11	brain
Atp6v1b2	0.2324	3.70E-03	3.00E-02	11	brain
Atp8a2	0.2253	4.80E-03	3.20E-02	11	brain
Atrnl1	0.4617	4.20E-04	1.20E-02	11	brain
Babam2	0.1986	1.20E-02	4.80E-02	11	brain
Bach2	0.5135	5.20E-03	3.30E-02	11	brain
Bcl11a	0.2251	5.60E-03	3.40E-02	11	brain
Brinp3	0.2905	8.30E-03	4.10E-02	11	brain
C130071C03Rik	0.5914	9.00E-03	4.20E-02	11	brain
C530008M17Rik	0.3767	6.40E-03	3.60E-02	11	brain
Cacna2d1	0.4057	1.10E-02	4.60E-02	11	brain
Cacna2d3	0.4656	4.90E-03	3.20E-02	11	brain
Cacnb2	0.6191	9.90E-03	4.50E-02	11	brain
Cadps	0.798	4.80E-04	1.30E-02	11	brain
Cadps2	-0.2903	9.20E-03	4.20E-02	11	brain
Camk2a	0.2246	8.50E-03	4.10E-02	11	brain
Car10	-0.5464	1.50E-03	2.00E-02	11	brain
Carmil1	0.2597	1.10E-04	8.50E-03	11	brain
Ccdc88a	0.4425	2.90E-03	2.70E-02	11	brain
Ccser1	0.5621	1.20E-02	5.00E-02	11	brain
Cdh10	0.4303	2.20E-03	2.40E-02	11	brain
Cdh18	-0.9246	7.00E-04	1.50E-02	11	brain
Cdh20	0.3438	3.30E-03	2.80E-02	11	brain
Cdk14	0.3577	1.40E-03	1.90E-02	11	brain
Cdk17	0.1962	1.20E-02	5.00E-02	11	brain
Cdkl5	0.3087	8.30E-03	4.10E-02	11	brain
Chd6	0.3256	2.40E-03	2.50E-02	11	brain
Chd7	-0.3101	1.10E-02	4.80E-02	11	brain
Chn2	-0.3926	2.80E-03	2.70E-02	11	brain
Chsy3	0.4579	3.60E-03	3.00E-02	11	brain
Cit	0.4603	2.80E-03	2.70E-02	11	brain
Clstn2	0.4341	1.80E-03	2.20E-02	11	brain
Cnr1	0.2884	1.10E-02	4.60E-02	11	brain
Cntn5	1.1032	5.60E-03	3.40E-02	11	brain
Csmd3	0.8926	4.30E-03	3.20E-02	11	brain
Cttnbp2	0.4638	6.00E-03	3.50E-02	11	brain
Daam1	0.2485	6.20E-03	3.60E-02	11	brain
Ddx50	0.2523	6.20E-03	3.60E-02	11	brain
Dlc1	0.4262	5.70E-04	1.50E-02	11	brain
Dlgap2	0.8297	3.70E-04	1.20E-02	11	brain
Dner	0.5402	7.10E-04	1.50E-02	11	brain
Dnm3	0.3424	5.90E-03	3.50E-02	11	brain
Dscaml1	0.4955	3.50E-04	1.20E-02	11	brain
Edil3	0.6416	1.20E-03	1.90E-02	11	brain
Egfem1	0.9596	1.90E-04	9.10E-03	11	brain
Egfr	0.5036	1.70E-03	2.10E-02	11	brain
Elavl2	0.3827	4.30E-03	3.20E-02	11	brain
Elmod1	0.3836	9.70E-03	4.40E-02	11	brain
Eml6	0.3923	1.00E-02	4.50E-02	11	brain
Enox1	0.2526	1.20E-02	5.00E-02	11	brain
Epha5	0.5169	9.10E-03	4.20E-02	11	brain
Erbb4	1.7291	7.00E-03	3.80E-02	11	brain
Erc2	0.6234	2.60E-03	2.60E-02	11	brain
Ewsr1	0.2049	4.10E-03	3.20E-02	11	brain
Fam172a	0.3798	4.40E-03	3.20E-02	11	brain
Farp1	0.2752	6.80E-03	3.70E-02	11	brain
Fgf13	0.9329	6.60E-04	1.50E-02	11	brain
Fmn1	0.2711	5.90E-03	3.50E-02	11	brain
Fnbp1	-0.1323	1.10E-02	4.60E-02	11	brain
Fnbp1l	0.4014	4.00E-04	1.20E-02	11	brain
Frmd4a	0.4015	4.60E-03	3.20E-02	11	brain
Frmd5	0.464	1.70E-03	2.10E-02	11	brain
Frmpd4	1.1375	3.90E-03	3.10E-02	11	brain
Fryl	0.3137	3.00E-03	2.70E-02	11	brain
Fstl4	0.3694	1.10E-03	1.70E-02	11	brain
Gabbr2	0.3392	8.00E-03	4.00E-02	11	brain
Gabra1	0.2979	3.40E-03	2.90E-02	11	brain
Gabra6	-0.2707	2.20E-03	2.40E-02	11	brain
Gabrg3	0.9307	1.70E-03	2.10E-02	11	brain
Gad1	0.6606	3.50E-05	6.90E-03	11	brain
Gad2	0.5666	5.30E-06	4.10E-03	11	brain
Galnt13	-0.4829	2.90E-03	2.70E-02	11	brain
Gm20275	0.276	2.10E-03	2.40E-02	11	brain
Gm38505	0.3217	1.50E-03	2.00E-02	11	brain
Gm9801	0.2367	4.80E-03	3.20E-02	11	brain
Gnas	0.1259	1.80E-03	2.10E-02	11	brain
Gng2	0.3942	9.90E-03	4.50E-02	11	brain
Gria2	0.4941	8.60E-03	4.10E-02	11	brain
Grid1	0.4258	1.10E-02	4.70E-02	11	brain
Grid2	-0.9786	6.80E-03	3.70E-02	11	brain
Grik1	0.8071	1.90E-03	2.30E-02	11	brain
Grin2a	0.6793	6.10E-04	1.50E-02	11	brain
Grin2b	0.9916	1.70E-03	2.10E-02	11	brain
Grm1	-0.2906	7.30E-03	3.90E-02	11	brain
Grm5	0.9564	1.10E-03	1.80E-02	11	brain
Hcn1	0.5734	5.00E-04	1.30E-02	11	brain
Hdac9	0.5863	9.60E-04	1.70E-02	11	brain
Igsf11	0.3433	7.90E-04	1.50E-02	11	brain
Il1rap	0.2995	3.90E-03	3.10E-02	11	brain
Itsn1	0.208	8.60E-03	4.10E-02	11	brain
Jazf1	0.2622	5.30E-03	3.30E-02	11	brain
Kalrn	0.423	1.00E-03	1.70E-02	11	brain
Kcnc1	0.224	1.20E-02	5.00E-02	11	brain
Kcnd2	-0.8007	9.30E-05	8.50E-03	11	brain
Kcnh7	0.7154	1.20E-04	8.50E-03	11	brain
Kcnip1	0.4821	5.20E-03	3.30E-02	11	brain
Kcnip4	-0.1876	7.60E-03	3.90E-02	11	brain
Kcnn2	0.6515	1.60E-04	8.90E-03	11	brain
Kcnq1ot1	0.3488	6.40E-03	3.60E-02	11	brain
Kcnq5	1.4291	4.20E-03	3.20E-02	11	brain
Kctd16	1.2289	1.20E-04	8.50E-03	11	brain
Kctd8	-0.4094	2.80E-03	2.70E-02	11	brain
Kdm4c	0.2755	7.60E-03	3.90E-02	11	brain
Kif1a	0.1763	1.20E-04	8.50E-03	11	brain
Kif5c	0.2903	4.70E-03	3.20E-02	11	brain
Kit	0.3808	1.00E-03	1.70E-02	11	brain
Ksr2	0.1083	5.60E-03	3.40E-02	11	brain
Large1	0.4026	4.30E-03	3.20E-02	11	brain
Las1l	0.2421	1.00E-02	4.60E-02	11	brain
Lcor	0.1377	1.30E-02	5.00E-02	11	brain
Lhfp	-0.3985	6.50E-04	1.50E-02	11	brain
Limch1	0.5718	9.20E-03	4.20E-02	11	brain
Lrfn5	0.6077	3.20E-03	2.80E-02	11	brain
Lrrc7	0.6137	2.90E-03	2.70E-02	11	brain
Lrrc8b	0.31	3.20E-03	2.80E-02	11	brain
Lrrfip1	0.2411	7.90E-03	4.00E-02	11	brain
Lrrtm4	1.0787	2.70E-03	2.70E-02	11	brain
Luzp2	0.6188	3.20E-04	1.20E-02	11	brain
Mef2a	0.2352	9.70E-03	4.40E-02	11	brain
Mef2c	0.5849	7.30E-03	3.90E-02	11	brain
Metap1d	0.2969	9.80E-04	1.70E-02	11	brain
Mgll	0.3044	9.00E-03	4.20E-02	11	brain
Mir100hg	0.3191	2.80E-03	2.70E-02	11	brain
Mir99ahg	0.8849	1.40E-04	8.90E-03	11	brain
Mpdz	0.3631	5.00E-03	3.30E-02	11	brain
Msra	0.3767	3.10E-03	2.80E-02	11	brain
Nav2	0.6823	1.10E-02	4.70E-02	11	brain
Nav3	0.8488	7.40E-05	7.90E-03	11	brain
Nbeal1	0.2758	2.20E-03	2.40E-02	11	brain
Ncald	0.4319	1.00E-03	1.70E-02	11	brain
Ncam2	0.4605	1.10E-02	4.80E-02	11	brain
Ndst3	-0.2228	1.30E-03	1.90E-02	11	brain
Nebl	0.3599	2.20E-03	2.40E-02	11	brain
Necab1	0.3079	2.20E-03	2.40E-02	11	brain
Nkain2	0.7541	7.10E-03	3.80E-02	11	brain
Nkain3	0.455	1.00E-03	1.70E-02	11	brain
Nr3c2	0.4689	2.60E-03	2.60E-02	11	brain
Nrxn2	0.1866	3.20E-04	1.20E-02	11	brain
Nsf	0.2914	2.30E-03	2.40E-02	11	brain
Ntm	-0.2622	4.30E-03	3.20E-02	11	brain
Ntrk3	-0.2774	5.20E-03	3.30E-02	11	brain
Nxph1	0.8749	7.40E-05	7.90E-03	11	brain
Nyap2	0.6444	4.00E-05	6.90E-03	11	brain
Ogt	0.5242	8.10E-04	1.60E-02	11	brain
Olfm3	-0.3559	5.40E-03	3.30E-02	11	brain
Osbpl8	0.4121	4.20E-03	3.20E-02	11	brain
Pam	0.6747	1.40E-03	2.00E-02	11	brain
Pcdh9	-0.1418	3.20E-03	2.80E-02	11	brain
Phactr1	0.7172	1.60E-04	8.90E-03	11	brain
Pja2	0.2446	3.90E-03	3.10E-02	11	brain
Plcb1	0.7693	1.30E-03	1.90E-02	11	brain
Pou2f1	0.1148	1.00E-02	4.50E-02	11	brain
Ppm1h	0.3694	6.30E-03	3.60E-02	11	brain
Prickle1	0.3229	7.60E-03	3.90E-02	11	brain
Prkca	0.4003	1.70E-03	2.10E-02	11	brain
Prkce	0.4048	3.60E-03	3.00E-02	11	brain
Prkg1	-0.6748	2.00E-04	9.30E-03	11	brain
Ptchd4	0.4227	9.70E-04	1.70E-02	11	brain
Ptprg	0.4856	1.10E-03	1.70E-02	11	brain
Ptprm	0.709	3.20E-04	1.20E-02	11	brain
Pvt1	0.4145	7.70E-04	1.50E-02	11	brain
Rab6a	0.2596	4.90E-03	3.20E-02	11	brain
Rasal2	0.4745	1.60E-03	2.10E-02	11	brain
Rasgrf2	0.4654	9.90E-03	4.50E-02	11	brain
Rbms3	0.7877	3.40E-05	6.90E-03	11	brain
Rere	0.3233	7.40E-03	3.90E-02	11	brain
Rgs6	0.4658	2.90E-04	1.20E-02	11	brain
Rgs7bp	0.3326	4.70E-03	3.20E-02	11	brain
Rian	0.6415	8.40E-03	4.10E-02	11	brain
Rimbp2	0.4804	3.60E-04	1.20E-02	11	brain
Rnpc3	0.2331	1.10E-02	4.80E-02	11	brain
Robo2	0.9676	5.20E-03	3.30E-02	11	brain
Rtn3	0.3428	9.00E-03	4.20E-02	11	brain
Sema5a	0.4064	8.00E-03	4.00E-02	11	brain
Sema6d	0.3349	1.10E-02	4.70E-02	11	brain
Sgcz	0.8603	1.30E-03	1.90E-02	11	brain
Sh3gl2	-0.2035	3.00E-03	2.70E-02	11	brain
Sipa1l1	0.4749	4.70E-04	1.30E-02	11	brain
Slc24a3	0.6061	9.10E-04	1.70E-02	11	brain
Slc25a12	0.166	8.60E-03	4.10E-02	11	brain
Slc35f1	0.3218	1.20E-02	5.00E-02	11	brain
Slc35f4	0.4115	4.10E-03	3.20E-02	11	brain
Slc44a5	0.4682	1.00E-02	4.50E-02	11	brain
Slc6a1	0.4007	4.60E-03	3.20E-02	11	brain
Sntg1	1.1939	1.80E-04	9.10E-03	11	brain
Sorbs1	0.4197	5.90E-03	3.50E-02	11	brain
Sox2ot	1.0545	8.50E-06	4.10E-03	11	brain
Spock3	0.4833	6.20E-03	3.60E-02	11	brain
Ssbp2	0.4505	6.80E-03	3.70E-02	11	brain
Stxbp5	0.2078	8.90E-03	4.20E-02	11	brain
Sybu	0.1471	1.20E-02	4.90E-02	11	brain
Tcf12	0.3091	8.00E-03	4.00E-02	11	brain
Tcf4	0.9786	8.20E-03	4.10E-02	11	brain
Tenm4	0.261	1.00E-02	4.50E-02	11	brain
Thrb	0.6618	1.40E-03	1.90E-02	11	brain
Tial1	0.1607	8.10E-03	4.00E-02	11	brain
Tiam1	0.1747	9.60E-03	4.40E-02	11	brain
Tmem132b	0.4486	4.70E-03	3.20E-02	11	brain
Tmem135	0.1726	7.70E-03	3.90E-02	11	brain
Tox3	0.3769	2.20E-04	9.70E-03	11	brain
Trim2	0.3058	2.00E-03	2.30E-02	11	brain
Trpc5	0.3	6.50E-03	3.60E-02	11	brain
Trpm3	-0.5821	3.20E-04	1.20E-02	11	brain
Ubash3b	0.3769	2.80E-03	2.70E-02	11	brain
Ube3a	0.3315	1.20E-02	4.90E-02	11	brain
Ube3c	0.1385	1.20E-02	5.00E-02	11	brain
Ubr3	0.4287	1.80E-03	2.20E-02	11	brain
Ubr5	0.3067	4.70E-03	3.20E-02	11	brain
Unc13c	-0.4903	5.40E-03	3.30E-02	11	brain
Unc5d	0.4166	5.10E-03	3.30E-02	11	brain
Usp32	0.2097	5.10E-03	3.30E-02	11	brain
Vstm2a	0.3182	6.10E-04	1.50E-02	11	brain
Wdr33	0.2687	7.20E-03	3.90E-02	11	brain
Xkr4	0.8056	4.40E-03	3.20E-02	11	brain
Zbtb16	0.5409	3.80E-03	3.10E-02	11	brain
Zeb2	0.9281	7.10E-05	7.90E-03	11	brain
Zfp521	-0.2568	7.50E-03	3.90E-02	11	brain
Zfp536	0.9319	6.50E-04	1.50E-02	11	brain
Zfp608	0.4804	7.50E-04	1.50E-02	11	brain
Zfp804b	0.5639	6.30E-04	1.50E-02	11	brain
Zmat4	0.826	1.10E-03	1.70E-02	11	brain
5330417C22Rik	0.4056	4.30E-03	3.10E-02	14	brain
5730522E02Rik	0.7793	5.40E-04	1.30E-02	14	brain
9530059O14Rik	0.6212	1.00E-03	1.50E-02	14	brain
Adamts3	0.6052	7.60E-04	1.40E-02	14	brain
Adcy5	0.6303	6.50E-03	3.80E-02	14	brain
Adgrl3	1.1277	1.60E-03	1.90E-02	14	brain
Ahi1	0.8563	1.60E-03	1.90E-02	14	brain
Alcam	0.8876	1.50E-03	1.90E-02	14	brain
Ano3	0.4953	1.10E-03	1.50E-02	14	brain
Arhgap32	0.3917	3.00E-03	2.60E-02	14	brain
Arhgap44	0.113	2.40E-03	2.30E-02	14	brain
Arpp21	0.5685	3.00E-03	2.60E-02	14	brain
Astn2	-1.0235	6.80E-03	4.00E-02	14	brain
Atp2b1	0.5328	9.50E-03	5.00E-02	14	brain
Atrnl1	0.5808	7.50E-04	1.40E-02	14	brain
Atxn1	0.7913	1.70E-04	1.00E-02	14	brain
B3galt1	0.8955	2.40E-04	1.00E-02	14	brain
Bcas3	0.3272	3.80E-03	2.90E-02	14	brain
Bcl11b	0.5011	9.80E-04	1.50E-02	14	brain
Cacna1a	-0.3643	9.40E-03	5.00E-02	14	brain
Cacna1e	0.7427	4.90E-04	1.20E-02	14	brain
Cacna2d3	1.3097	4.10E-06	3.60E-03	14	brain
Cacnb2	1.0065	5.80E-04	1.30E-02	14	brain
Camk2a	0.4243	3.10E-03	2.60E-02	14	brain
Camk2b	0.4614	6.10E-03	3.70E-02	14	brain
Car10	-1.3915	2.50E-04	1.00E-02	14	brain
Cdk17	0.4676	2.80E-03	2.50E-02	14	brain
Celf2	1.7637	1.60E-04	1.00E-02	14	brain
Celf4	0.4591	9.00E-03	4.80E-02	14	brain
Chsy3	0.6217	1.80E-03	1.90E-02	14	brain
Cntn3	0.4689	5.20E-03	3.40E-02	14	brain
Cntn5	0.9785	1.00E-03	1.50E-02	14	brain
Csmd1	1.341	1.00E-04	9.80E-03	14	brain
Csmd3	1.2233	7.00E-05	9.80E-03	14	brain
Csrnp3	0.4935	2.90E-03	2.60E-02	14	brain
Cttnbp2	0.6844	1.50E-03	1.90E-02	14	brain
Dab1	0.7134	8.30E-03	4.60E-02	14	brain
Dach1	0.3787	9.50E-03	5.00E-02	14	brain
Dcc	1.2153	3.40E-04	1.10E-02	14	brain
Dclk1	0.7445	1.60E-04	1.00E-02	14	brain
Dgkb	1.474	3.60E-04	1.10E-02	14	brain
Dgkh	0.4355	8.80E-03	4.80E-02	14	brain
Dgki	0.6806	1.20E-03	1.70E-02	14	brain
Dlg2	1.6066	7.10E-05	9.80E-03	14	brain
Dlgap2	1.1947	8.20E-05	9.80E-03	14	brain
Dok6	0.7259	5.80E-04	1.30E-02	14	brain
Dtnb	0.4869	5.30E-03	3.50E-02	14	brain
Elmo1	0.5047	4.20E-03	3.10E-02	14	brain
Elmod1	0.524	7.90E-03	4.40E-02	14	brain
Epha5	0.5748	3.20E-03	2.60E-02	14	brain
Epha6	1.018	8.40E-04	1.50E-02	14	brain
Erc2	0.8903	1.70E-04	1.00E-02	14	brain
Foxp1	0.9385	1.10E-03	1.60E-02	14	brain
Fras1	0.425	1.50E-03	1.90E-02	14	brain
Frmpd4	0.9589	6.00E-03	3.70E-02	14	brain
Gabra2	0.4349	4.90E-03	3.30E-02	14	brain
Gabrb3	0.9091	3.60E-05	9.80E-03	14	brain
Gabrg3	1.1367	3.50E-04	1.10E-02	14	brain
Gm1604a	0.3566	2.40E-03	2.30E-02	14	brain
Gm20275	0.1635	6.70E-03	3.90E-02	14	brain
Gm26871	0.7007	2.20E-03	2.20E-02	14	brain
Gnal	0.7452	7.00E-04	1.40E-02	14	brain
Gng7	0.4486	2.20E-03	2.20E-02	14	brain
Gria1	1.3961	1.50E-03	1.90E-02	14	brain
Gria2	0.7394	2.70E-03	2.40E-02	14	brain
Gria3	0.6265	3.10E-03	2.60E-02	14	brain
Grid1	0.8675	4.80E-04	1.20E-02	14	brain
Grin2b	1.2926	2.20E-04	1.00E-02	14	brain
Grip1	0.8356	4.90E-03	3.30E-02	14	brain
Grm5	1.9204	1.90E-04	1.00E-02	14	brain
Grm7	1.678	5.00E-04	1.20E-02	14	brain
Gsk3b	0.3565	9.90E-04	1.50E-02	14	brain
Hnrnpu	-0.205	3.90E-03	2.90E-02	14	brain
Homer1	0.4319	7.70E-03	4.40E-02	14	brain
Hs6st3	0.3894	7.80E-03	4.40E-02	14	brain
Immp2l	0.4401	4.60E-03	3.20E-02	14	brain
Itpr1	0.6951	5.00E-04	1.20E-02	14	brain
Kalrn	0.9069	9.50E-04	1.50E-02	14	brain
Kcnq3	0.5278	5.60E-03	3.50E-02	14	brain
Kcnq5	1.6977	2.40E-04	1.00E-02	14	brain
Kctd16	1.1029	2.90E-04	1.10E-02	14	brain
Klhl29	0.5639	8.30E-04	1.50E-02	14	brain
Kmt2a	0.1026	1.30E-03	1.70E-02	14	brain
Lhfpl3	0.5997	8.50E-04	1.50E-02	14	brain
Lingo2	0.974	5.70E-03	3.60E-02	14	brain
Lncpint	0.5944	2.00E-03	2.20E-02	14	brain
Lrfn5	0.8462	2.50E-03	2.30E-02	14	brain
Lrp1b	1.2594	2.50E-03	2.30E-02	14	brain
Lrrc7	1.4697	9.50E-05	9.80E-03	14	brain
Mbd5	0.528	5.50E-03	3.50E-02	14	brain
Meis2	1.3824	2.60E-04	1.00E-02	14	brain
Mgat4c	0.5451	4.80E-03	3.30E-02	14	brain
Mical3	0.2552	6.30E-03	3.80E-02	14	brain
Mrtfb	0.4669	3.00E-03	2.60E-02	14	brain
Myt1l	0.9505	8.00E-05	9.80E-03	14	brain
Nebl	0.468	4.00E-03	3.00E-02	14	brain
Neto1	0.5782	1.40E-03	1.80E-02	14	brain
Nkain2	1.882	1.70E-03	1.90E-02	14	brain
Npas2	0.4522	4.20E-03	3.10E-02	14	brain
Nr3c2	0.4547	3.90E-03	2.90E-02	14	brain
Nrg1	1.2215	2.70E-03	2.40E-02	14	brain
Ogt	0.532	1.90E-03	2.00E-02	14	brain
Osbpl8	0.576	1.70E-03	1.90E-02	14	brain
Pak3	0.3772	4.50E-03	3.20E-02	14	brain
Pan3	-0.0221	4.70E-03	3.30E-02	14	brain
Pard3	0.541	1.00E-03	1.50E-02	14	brain
Pcsk2	0.6893	2.60E-03	2.40E-02	14	brain
Pde7b	0.8337	7.10E-04	1.40E-02	14	brain
Pde8b	0.6648	6.30E-03	3.80E-02	14	brain
Pdzd2	0.6879	1.60E-03	1.90E-02	14	brain
Phactr1	1.8208	1.60E-05	6.80E-03	14	brain
Plcb1	1.6346	5.90E-04	1.30E-02	14	brain
Plcl2	0.474	4.90E-03	3.30E-02	14	brain
Ppp1r9a	0.4934	6.00E-03	3.70E-02	14	brain
Ppp2r2b	0.5771	2.10E-03	2.20E-02	14	brain
Prkcb	0.6123	5.90E-03	3.60E-02	14	brain
Prkg1	0.8117	1.40E-03	1.80E-02	14	brain
Prkn	0.7103	2.10E-03	2.20E-02	14	brain
Ptprn2	0.9941	2.40E-04	1.00E-02	14	brain
R3hdm1	0.7123	1.60E-03	1.90E-02	14	brain
Rarb	1.0003	1.20E-03	1.70E-02	14	brain
Rasal2	0.3963	3.70E-03	2.90E-02	14	brain
Rasgef1a	0.3881	3.70E-03	2.90E-02	14	brain
Rbms3	0.5414	6.10E-03	3.70E-02	14	brain
Rfx3	0.4864	7.80E-03	4.40E-02	14	brain
Rgs9	0.4781	5.60E-03	3.50E-02	14	brain
Robo1	1.1641	1.80E-04	1.00E-02	14	brain
Runx1t1	0.4247	4.20E-03	3.10E-02	14	brain
Ryr3	0.9924	9.90E-04	1.50E-02	14	brain
Samd12	0.5911	2.30E-03	2.30E-02	14	brain
Scn3a	0.332	3.30E-03	2.60E-02	14	brain
Sgcd	0.719	8.30E-03	4.60E-02	14	brain
Shisa9	0.6351	3.50E-03	2.80E-02	14	brain
Slc35f1	0.6209	4.60E-03	3.20E-02	14	brain
Snhg14	0.1457	4.50E-04	1.20E-02	14	brain
Sntg1	0.7458	4.90E-03	3.30E-02	14	brain
Sorbs2	0.9503	3.80E-04	1.10E-02	14	brain
Sox2ot	0.6465	7.20E-03	4.20E-02	14	brain
Spock3	0.8888	3.10E-04	1.10E-02	14	brain
Stox2	0.7859	7.60E-04	1.40E-02	14	brain
Tanc2	0.7966	1.20E-03	1.70E-02	14	brain
Tenm2	1.1408	9.40E-03	5.00E-02	14	brain
Tenm4	0.9408	3.50E-04	1.10E-02	14	brain
Thsd7a	0.5337	1.90E-03	2.00E-02	14	brain
Tia1	0.3222	3.80E-04	1.10E-02	14	brain
Tjp1	0.3544	1.90E-03	2.00E-02	14	brain
Tle4	0.3784	7.60E-03	4.30E-02	14	brain
Tmem132b	0.3869	6.40E-03	3.80E-02	14	brain
Tmem135	0.1449	2.80E-03	2.50E-02	14	brain
Trank1	0.6043	6.30E-04	1.30E-02	14	brain
Trerf1	0.4322	3.70E-03	2.90E-02	14	brain
Trim46	0.1942	9.30E-04	1.50E-02	14	brain
Trps1	0.4333	3.80E-03	2.90E-02	14	brain
Unc79	0.5828	2.30E-03	2.30E-02	14	brain
Zdhhc14	0.4218	4.50E-03	3.20E-02	14	brain

## Sheet: cluster18
	p_val	avg_logFC	pct.1	pct.2	p_val_adj	cluster	gene
Myl31	3.23842447584157e-55	0.480352975130248	1	0.995	5.92404989365698e-51	18	Myl3
Tnni3	1.73564030622304e-49	0.500010369580627	1	0.998	3.1750068121738e-45	18	Tnni3
Tpm1	2.23402077354064e-41	0.322629772831747	1	0.999	4.08669420103789e-37	18	Tpm1
Mb	5.84252728557353e-41	0.318385875609622	1	0.999	1.06877351634997e-36	18	Mb
Slc25a4	1.89239734585786e-39	0.31355614548069	1	0.997	3.46176246477778e-35	18	Slc25a4
Mgst3	1.28374006282405e-38	0.598380419076097	1	0.891	2.34834569692404e-34	18	Mgst3
Myl21	4.38232005010609e-36	0.323760468932483	1	0.994	8.01657806765907e-32	18	Myl2
Cox4i1	1.14361219585465e-35	0.273236394705188	1	0.996	2.09200978987691e-31	18	Cox4i1
Tnnc1	1.32514497663687e-34	0.337773079560942	1	0.994	2.42408770576182e-30	18	Tnnc1
Etfb	3.60837432036825e-33	0.447017726645456	1	0.953	6.60079914424963e-29	18	Etfb
Tnnt2	1.07617106117324e-31	0.288417069283737	1	0.997	1.9686397222042e-27	18	Tnnt2
S100a1	5.36321124573777e-29	0.385722944479913	1	0.964	9.81092233182811e-25	18	S100a1
Atp5h	1.54446553305316e-28	0.346400005479262	1	0.983	2.82529079961414e-24	18	Atp5h
Chchd10	3.40909199871162e-28	0.276887378053206	1	0.983	6.23625199324316e-24	18	Chchd10
Ech11	3.78494160810147e-27	0.359909966540391	1	0.974	6.92379368370003e-23	18	Ech1
Atp5o.1	4.18607672234633e-27	0.280780405815678	1	0.982	7.65759014818815e-23	18	Atp5o.1
Myh6	5.02605777972971e-26	0.340961589030918	1	1	9.19416749645955e-22	18	Myh6
Cox5b	1.57915482688909e-25	0.26170011557479	1	0.988	2.88874792482822e-21	18	Cox5b
Atp5d	3.59876860243654e-25	0.3021153410449	1	0.97	6.58322740443717e-21	18	Atp5d
Ndufb9	9.52069467718591e-24	0.27164245450299	1	0.978	1.74162067729762e-19	18	Ndufb9
Pgam2	1.13248718576705e-23	0.339918229914462	1	0.945	2.07165880892366e-19	18	Pgam2
Ndufs7	2.12006160009145e-23	0.40687437709351	1	0.942	3.8782286850473e-19	18	Ndufs7
Eno3	3.89772153025916e-23	0.312017801165628	1	0.962	7.13010199530308e-19	18	Eno3
Sdhb	5.63803218586374e-23	0.358552924627883	1	0.965	1.03136522776005e-18	18	Sdhb
Ttll1	8.00165988991873e-23	0.528191733796082	1	0.694	1.46374364366283e-18	18	Ttll1
Csrp3	8.72949913263075e-23	0.324713691099376	1	0.977	1.59688727633214e-18	18	Csrp3
Ndufb8	9.26642642208211e-23	0.262484340608807	1	0.973	1.69510738539148e-18	18	Ndufb8
Uqcrq	1.19747342627078e-22	0.267994505441281	1	0.99	2.19053813867714e-18	18	Uqcrq
Mpc2	3.57337184560994e-22	0.370733108095771	1	0.94	6.53676911717426e-18	18	Mpc2
Mpc11	6.76305602650886e-22	0.346088894657634	1	0.931	1.23716583892927e-17	18	Mpc1
Lrtm12	7.36485559735862e-22	0.372236764341594	0.962	0.515	1.34725303442481e-17	18	Lrtm1
Ndufb11	3.0274283214887e-21	0.302402990563077	1	0.958	5.53807462849929e-17	18	Ndufb11
Fabp31	7.37491904228569e-21	0.26600481560927	1	0.998	1.34909394040532e-16	18	Fabp3
Hspb1	3.20224780521111e-20	0.309153191471436	1	0.88	5.85787191007269e-16	18	Hspb1
Ldhb	4.03407072043831e-20	0.276411951455309	1	0.97	7.37952556889779e-16	18	Ldhb
Cox7b	2.34385995689195e-19	0.260908403643741	1	0.985	4.28762301914244e-15	18	Cox7b
Ndufab1	2.67703031008857e-19	0.264455919229409	1	0.96	4.89709154624503e-15	18	Ndufab1
Cox5a	3.41878028164328e-19	0.302274164437779	1	0.979	6.25397476921006e-15	18	Cox5a
Chchd2	1.14549740047952e-18	0.282247917438173	1	0.966	2.09545839469718e-14	18	Chchd2
Ndufv2	1.68902644030897e-18	0.323905551003034	1	0.94	3.0897360672572e-14	18	Ndufv2
Eci1	5.38593470975249e-18	0.36975716323767	1	0.832	9.85249036455023e-14	18	Eci1
Ndufb2	3.05429295139101e-17	0.294711818785436	1	0.95	5.58721809597958e-13	18	Ndufb2
Ndufs8	4.5073502632718e-17	0.271132435097641	1	0.886	8.2452958366031e-13	18	Ndufs8
Idh2	7.08830782603905e-17	0.255236634877781	1	0.947	1.29666415061732e-12	18	Idh2
Ndufc2	9.65459893099183e-17	0.350036488491813	1	0.874	1.76611578244634e-12	18	Ndufc2
Ndufa12	1.14132539672626e-16	0.32178589207554	1	0.928	2.08782654823135e-12	18	Ndufa12
Ndufs3	5.98190439329252e-16	0.385049400299815	1	0.906	1.094269770665e-11	18	Ndufs3
Fbxl22	2.87545400070749e-15	0.347467589748243	0.951	0.626	5.26006800349421e-11	18	Fbxl22
Prdx5	7.18375434081239e-15	0.343787668076008	1	0.907	1.31412418156481e-10	18	Prdx5
Ndufb6	1.24553206080618e-14	0.290780574844779	1	0.91	2.27845179883274e-10	18	Ndufb6
Map1lc3a	2.05326786506687e-14	0.324940346277341	1	0.928	3.75604290556682e-10	18	Map1lc3a
Ano10	8.36385995473658e-14	0.407415219975213	0.973	0.69	1.53000090151996e-09	18	Ano10
Lars24	9.49478605132076e-14	0.278786521798548	0.902	0.524	1.73688121236811e-09	18	Lars2
Mrpl12	1.05575016914389e-13	0.345434679851938	1	0.835	1.93128378441492e-09	18	Mrpl12
Kcnip2	2.82940017554548e-13	0.252007930065893	0.984	0.682	5.17582174112534e-09	18	Kcnip2
Psmb6	1.42020446213118e-12	0.328860450488649	0.995	0.757	2.59798002257656e-08	18	Psmb6
Swi5	5.80834678017199e-12	0.280392432952784	0.995	0.791	1.06252087649686e-07	18	Swi5
Ndufs4	2.35905432833754e-11	0.303384118130739	1	0.88	4.31541808282786e-07	18	Ndufs4
Idh3b	4.36419393897359e-11	0.251730868237172	1	0.895	7.98341997256439e-07	18	Idh3b
Scand1	8.35478638611467e-11	0.274198829602137	0.929	0.661	1.52834107361196e-06	18	Scand1
Acot13	1.04052324531812e-10	0.26760355331801	1	0.912	1.90342917266044e-06	18	Acot13
Hsd17b10	1.89097772598194e-10	0.286232618025829	0.962	0.717	3.45916555413876e-06	18	Hsd17b10
